# Supplementary material for: Mitsunobu-initiated cascade cyclization ofp-quinamines and 2-furanylmethanols: highly regio- and diastereoselective synthesis of functionalized hydrobenzo[c,d]indoles
Source: Royal Society of Chemistry journal article supplement (doi:10.1039/c9ob00585d), 2019-01-01
Supplement: c9ob00585d1.pdf [file c9ob00585d1.pdf]

## Supporting Information

### Mitsunobu-initiated cascade cyclization of *p*-quinamines and 2-furanylmethanols: highly regio- and diastereoselective synthesis of functionalized hydrobenzo[*c,d*]indoles

*Bo Cao,<sup>b</sup> Yin Wei,<sup>a\*</sup> and Min Shi<sup>a,b\*</sup>*

<sup>a</sup>State Key Laboratory of Organometallic Chemistry, Center for Excellence in Molecular Synthesis, Shanghai Institute of Organic Chemistry, Chinese Academy of Sciences, 345 Lingling Road, Shanghai 200032 China.

<sup>b</sup>Key Laboratory for Advanced Materials and Institute of Fine Chemicals, School of Chemistry & Molecular Engineering, East China University of Science and Technology, 130 Mei Long Road, Shanghai 200237, China.

[weiyin@mail.sioc.ac.cn](mailto:weiyin@mail.sioc.ac.cn), [Mshi@mail.sioc.ac.cn](mailto:Mshi@mail.sioc.ac.cn). Fax 86-21-64166128

#### CONTENTS

|                                                                                                                  |         |
|------------------------------------------------------------------------------------------------------------------|---------|
| 1. General remarks.....                                                                                          | S2      |
| 2. General procedure for synthesis of <b>1</b> .....                                                             | S3      |
| 3. Characterization and spectra charts for <b>1</b> .....                                                        | S4-S17  |
| 4. General procedure for the Mitsunobu-initiated cascade polycyclization.....                                    | S18     |
| 5. Characterization and spectra charts for <b>3</b> .....                                                        | S19-S51 |
| 6. General procedure for the synthesis of <b>4</b> , <b>5</b> and their characterization and spectra charts..... | S52-S55 |
| 7. X-ray crystallographic information of product <b>3a</b> .....                                                 | S56     |
| 8. References.....                                                                                               | S57     |

## 1. General remarks.

Melting point (MP) was obtained with a Yanagimoto micro melting point apparatus and is uncorrected. Infrared spectra were measured on a spectrometer.  $^1\text{H}$  NMR spectra were recorded on a Agilent DD2 400-MR spectrometer for solution in  $\text{CDCl}_3$  with tetramethylsilane (TMS) as internal standard;  $J$ -values are in Hz.  $^{13}\text{C}$  NMR spectra were recorded at 100 MHz.  $^{19}\text{F}$  NMR spectra were recorded at 376 MHz. Data for  $^1\text{H}$ ,  $^{13}\text{C}$ ,  $^{19}\text{F}$  NMR were recorded as follows: chemical shift ( $\delta$ , ppm), multiplicity (s = singlet, d = doublet, t = triplet, m = multiplet, q = quartet, br = broad). Mass spectra were recorded with a HP-5989 instrument and HRMS was measured by a Finnigan MA+ mass spectrometer. Organic solvents used were dried by standard methods when necessary. Commercially available reagents were used without further purification. All reactions were monitored by TLC with Huanghai GF<sub>254</sub> silica gel coated plates. Flash column chromatography was carried out using 300-400 mesh silica gel at increased pressure. All reactions were performed under argon using standard Schlenk techniques.

Compounds **1a**, **1b**, **1d**, and **1i-1o** were prepared according to the previously reported procedures.<sup>[1]</sup>

## 2. General procedure for synthesis of **1**.

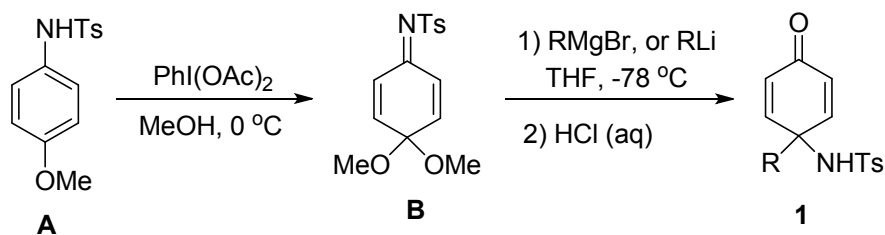

To a solution of **A** (10.0 mmol, 1.0 equiv), in  $\text{MeOH}$  (50 mL),  $\text{PhI}(\text{OAc})_2$  (10.0 mmol, 1.0 equiv) was added dropwise at  $0\text{ }^\circ\text{C}$  under Ar. The resulting mixture was stirred for 3 hours at  $0\text{ }^\circ\text{C}$ . Then, an aqueous solution of saturated  $\text{NaHCO}_3$  was carefully added to quench the reaction. Next, the solution was extracted by DCM for 3 times, dried over anhydrous  $\text{Na}_2\text{SO}_4$ , and concentrated in vacuum. Finally, the residue was purified by a silica gel flash chromatography (eluent: petroleum ether / ethyl acetate = 8 / 1~4 / 1) to give intermediate **B** as a white solid.

To a solution of **B** (8.0 mmol, 1.0 equiv) in anhydrous  $\text{THF}$  (25 mL),  $\text{RMgBr}$  or  $\text{RLi}$  (13.0 mmol, 1.3 equiv) was carefully added dropwise at  $-78\text{ }^\circ\text{C}$  under argon atmosphere. After the reaction completed, the reaction was quenched by  $\text{HCl}$  (2.0 M aq). The reaction mixture was extracted by EA for 3 times and the combined organic layers were washed with brine and dried over sodium sulfate. Then, the solution was concentrated in vacuo to yield the crude product, which was purified by a flash chromatography on silica gel (eluent: PE/EtOAc = 8/1 ~ 6/1) to furnish the desired product **1**.

### 3. Characterization and spectra charts for 1.

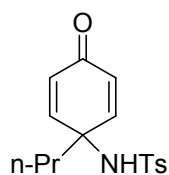

#### Compound 1c:

8.0 mmol scale, a white solid, 28% yield (678.7 mg). M.p.: 165-168 °C.  $^1\text{H}$  NMR ( $\text{CDCl}_3$ , TMS, 400 MHz)  $\delta$  0.82 (t,  $J = 7.6$  Hz, 3H), 1.14-1.24 (m, 2H), 1.66-1.71 (m, 2H), 2.42 (s, 3H), 6.06 (d,  $J = 10.0$  Hz, 2H), 6.07 (s, 1H), 6.60 (d,  $J = 10.0$  Hz, 2H), 7.26 (d,  $J = 8.0$  Hz, 2H), 7.69 (d,  $J = 8.0$  Hz, 2H).  $^{13}\text{C}$  NMR ( $\text{CDCl}_3$ , TMS, 100 MHz)  $\delta$  13.7, 16.4, 21.5, 42.2, 57.7, 127.7, 129.0, 129.5, 137.4, 144.1, 149.8, 185.2. IR (neat)  $\nu$  3246, 3125, 3044, 2964, 2932, 2898, 2875, 1663, 1614, 1494, 1455, 1382, 1340, 1178, 1157, 1128, 1093, 1024, 980, 941, 924, 855, 813, 776, 735, 723, 706, 672  $\text{cm}^{-1}$ . HRMS (ESI) Calcd. for  $\text{C}_{16}\text{H}_{19}\text{NO}_3\text{SNa}^{+1}(\text{M}+\text{Na})^{+}$  requires: 328.0978, Found: 328.0976.

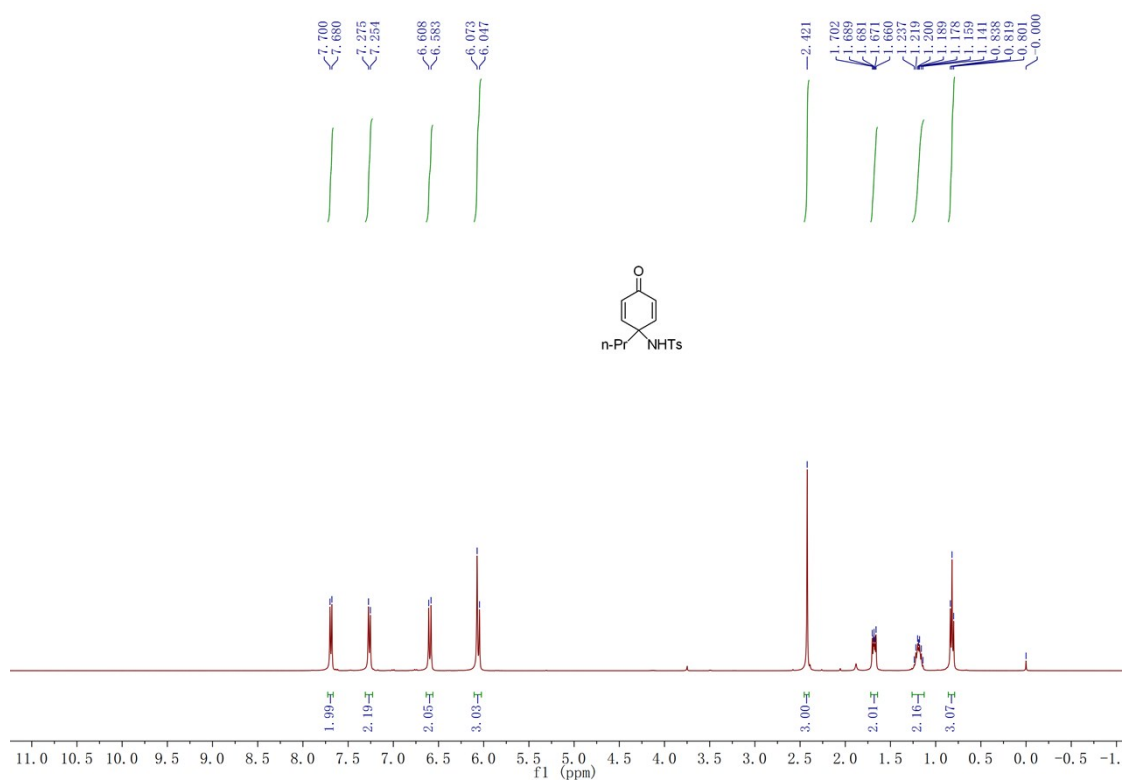

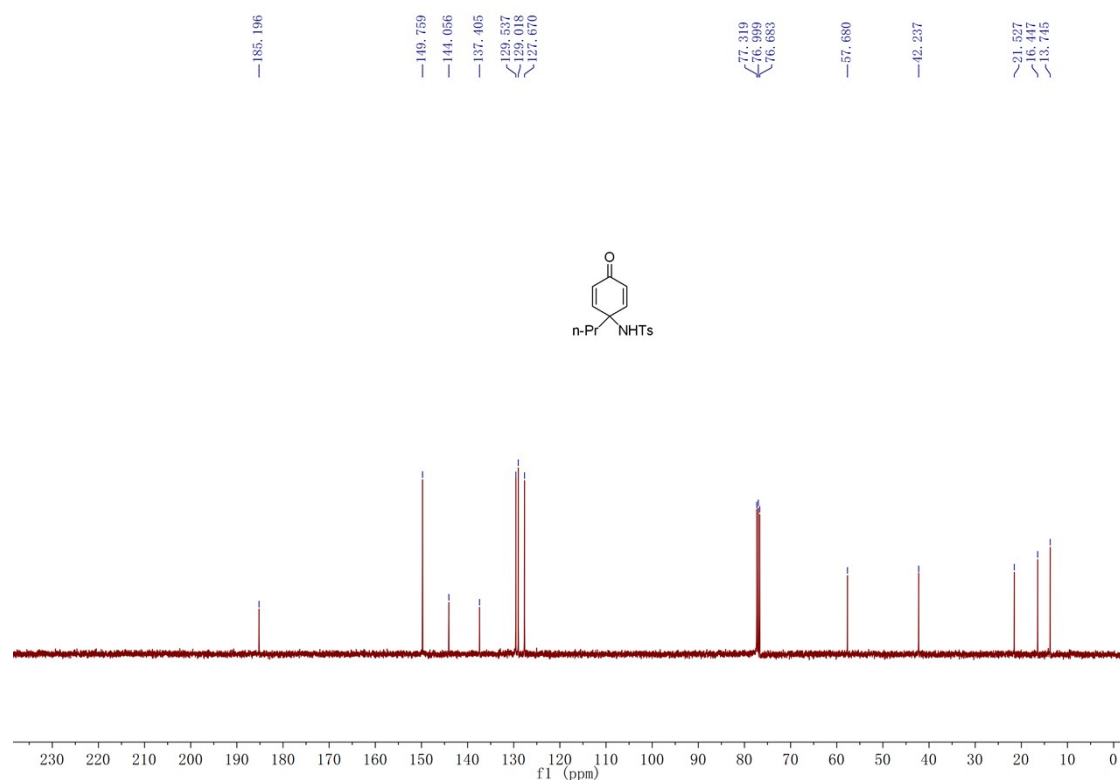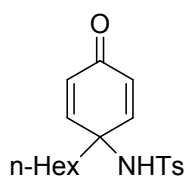

### Compound 1e:

8.0 mmol scale, a light yellow solid, 50% yield (1.3961 g). M.p.: 88-90 °C.  $^1\text{H}$  NMR ( $\text{CDCl}_3$ , TMS, 400 MHz)  $\delta$  0.82 (t,  $J = 7.2$  Hz, 3H), 1.10-1.23 (m, 8H), 1.66-1.71 (m, 2H), 2.42 (s, 3H), 5.83 (s, 1H), 6.06 (d,  $J = 10.0$  Hz, 2H), 6.58 (d,  $J = 10.0$  Hz, 2H), 7.26 (d,  $J = 8.0$  Hz, 2H), 7.68 (d,  $J = 8.0$  Hz, 2H).  $^{13}\text{C}$  NMR ( $\text{CDCl}_3$ , TMS, 100 MHz)  $\delta$  13.9, 21.5, 22.4, 23.0, 28.9, 31.4, 40.3, 57.7, 127.7, 129.1, 129.6, 137.4, 144.1, 149.7, 185.1. IR (neat)  $\nu$  3247, 3063, 3044, 2950, 2927, 2858, 1663, 1621, 1598, 1509, 1495, 1455, 1397, 1381, 1336, 1304, 1157, 1091, 1021, 938, 907, 858, 814, 734, 705, 663  $\text{cm}^{-1}$ . HRMS (ESI) Calcd. for  $\text{C}_{19}\text{H}_{29}\text{N}_2\text{O}_3\text{S}^{+1}(\text{M}+\text{NH}_4)^+$  requires: 365.1893, Found: 365.1888.

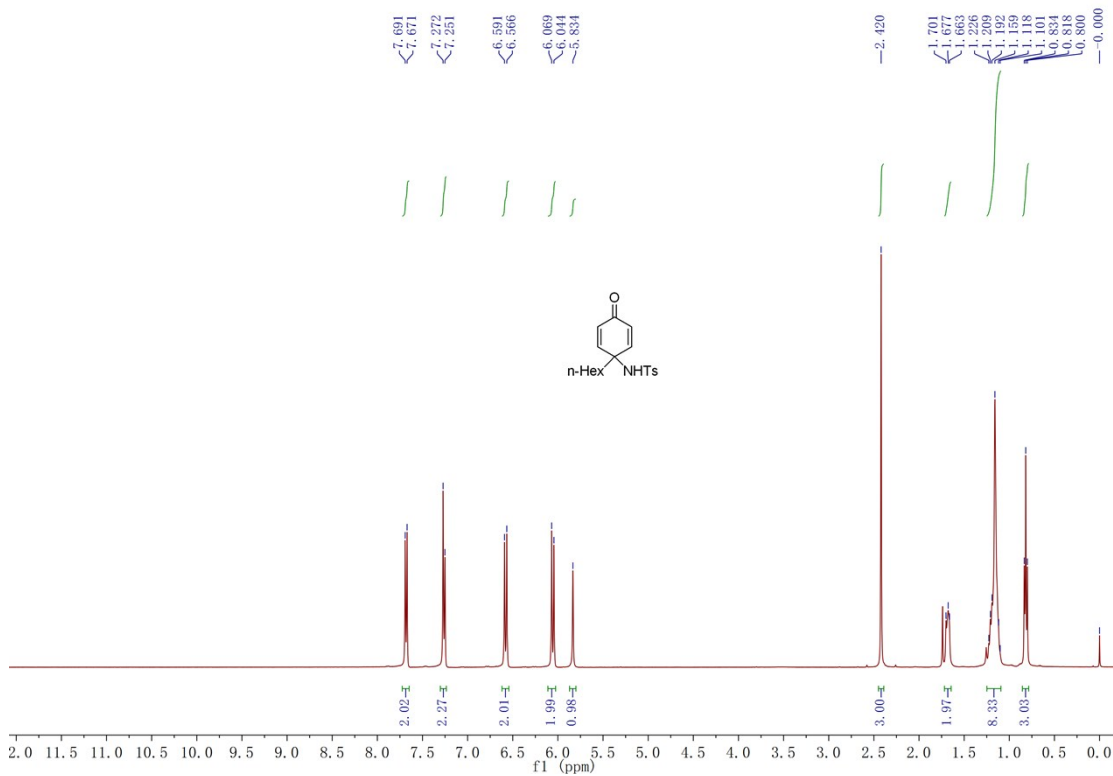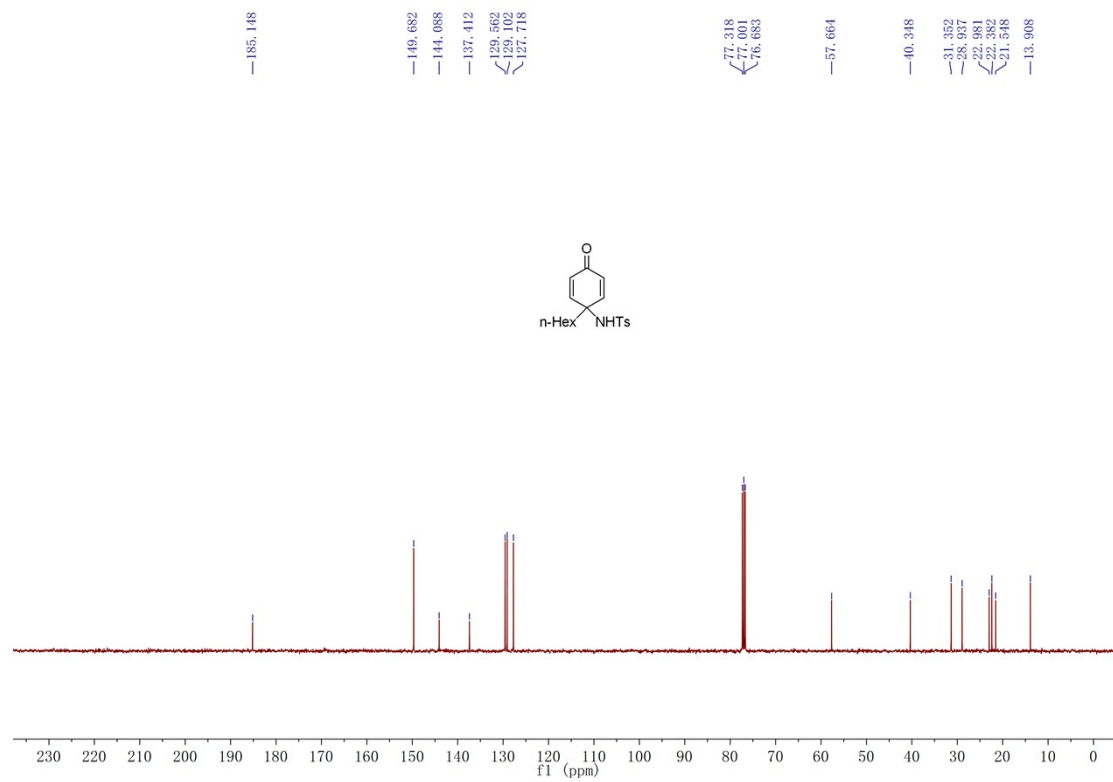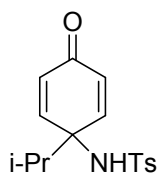

Compound 1f:

8.0 mmol scale, a white solid, 38% yield (926.2 mg). M.p.: 180-183 °C. <sup>1</sup>H NMR (CDCl<sub>3</sub>, TMS, 400 MHz) δ 0.92 (d, *J* = 7.2 Hz, 6H), 1.89-2.00 (m, 1H), 2.42 (s, 3H), 6.04 (s, 1H), 6.08 (q, *J* = 10.0 Hz, 2H), 6.58 (d, *J* = 10.0 Hz, 2H), 7.25 (d, *J* = 8.0 Hz, 2H), 7.68 (d, *J* = 8.0 Hz, 2H). <sup>13</sup>C NMR (CDCl<sub>3</sub>, TMS, 100 MHz) δ 16.8, 21.5, 37.7, 60.4, 127.7, 129.5, 129.9, 137.4, 144.0, 148.3, 185.2. IR (neat) ν 3249, 3099, 2972, 2934, 2911, 2874, 2783, 1663, 1616, 1463, 1386, 1341, 1323, 1230, 1183, 1159, 1140, 1117, 1092, 1063, 1042, 997, 975, 936, 906, 848, 815, 707, 664 cm<sup>-1</sup>. HRMS (ESI) Calcd. for C<sub>16</sub>H<sub>19</sub>NO<sub>3</sub>SNa<sup>+</sup>(M+Na)<sup>+</sup> requires: 328.0978, Found: 328.0977.

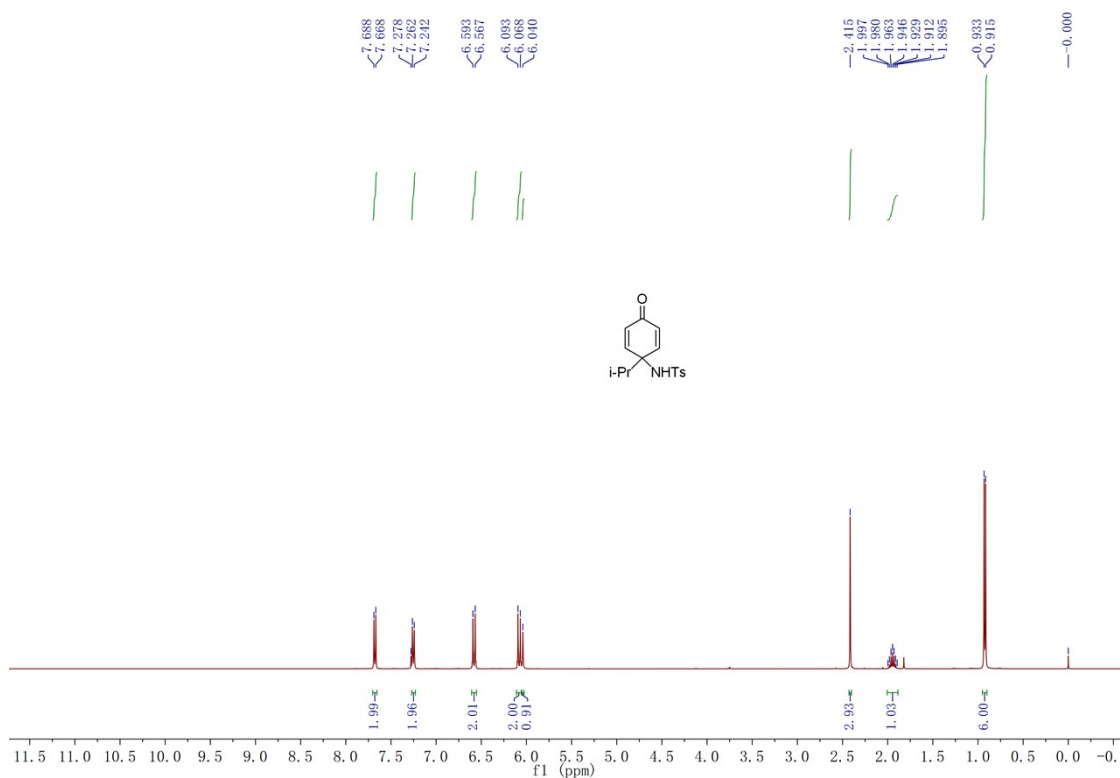

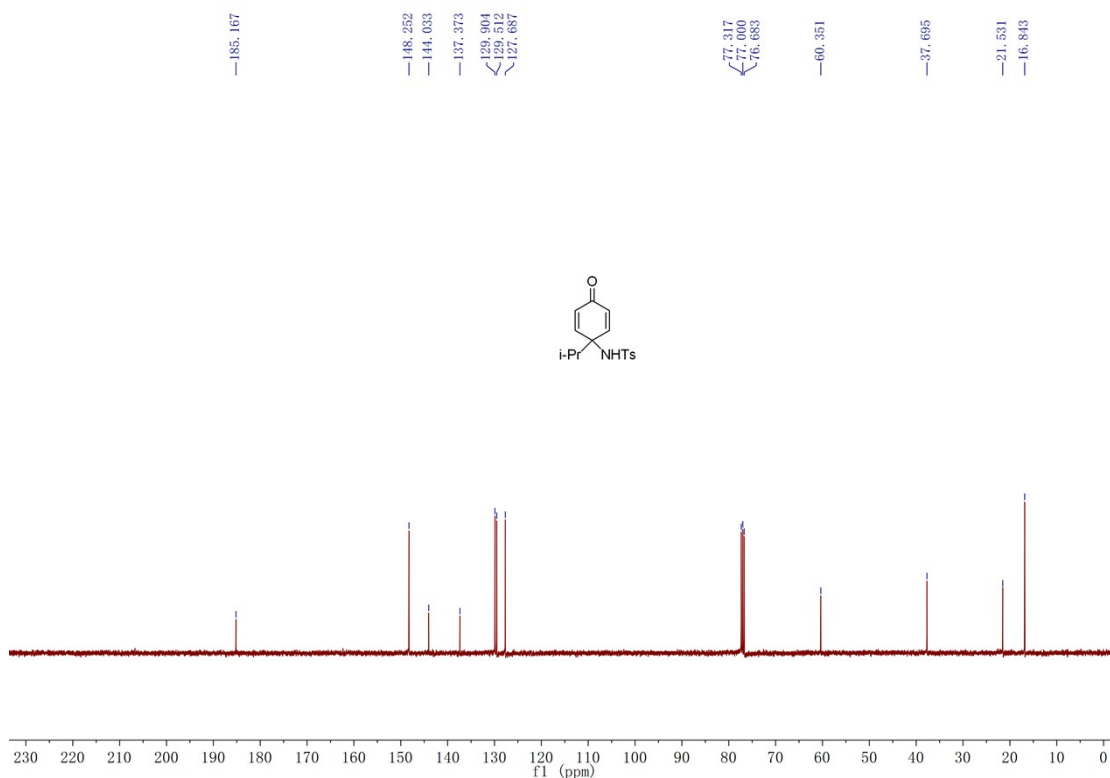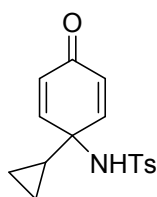

### Compound 1g:

8.0 mmol scale, a yellow solid, 71% yield (1.7095 g). M.p.: 160-162 °C. <sup>1</sup>H NMR (CDCl<sub>3</sub>, TMS, 400 MHz) δ 0.31-0.36 (m, 2H), 0.45-0.51 (m, 2H), 1.15-1.22 (m, 1H), 2.42 (s, 3H), 6.03 (d, *J* = 10.4 Hz, 2H), 6.16 (s, 1H), 6.55 (d, *J* = 10.4 Hz, 2H), 7.26 (d, *J* = 8.0 Hz, 2H), 7.71 (d, *J* = 8.0 Hz, 2H). <sup>13</sup>C NMR (CDCl<sub>3</sub>, TMS, 100 MHz) δ 1.6, 20.8, 21.5, 56.9, 127.6, 128.8, 129.5, 137.5, 144.0, 148.1, 184.9. IR (neat) ν 3244, 3060, 3008, 2921, 2864, 1663, 1621, 1494, 1431, 1383, 1327, 1239, 1181, 1157, 1090, 1038, 1001, 945, 894, 842, 814, 734, 705, 663 cm<sup>-1</sup>. HRMS (ESI) Calcd. for C<sub>16</sub>H<sub>17</sub>NO<sub>3</sub>SNa<sup>+1</sup>(M+Na)<sup>+</sup> requires: 326.0821, Found: 326.0821.



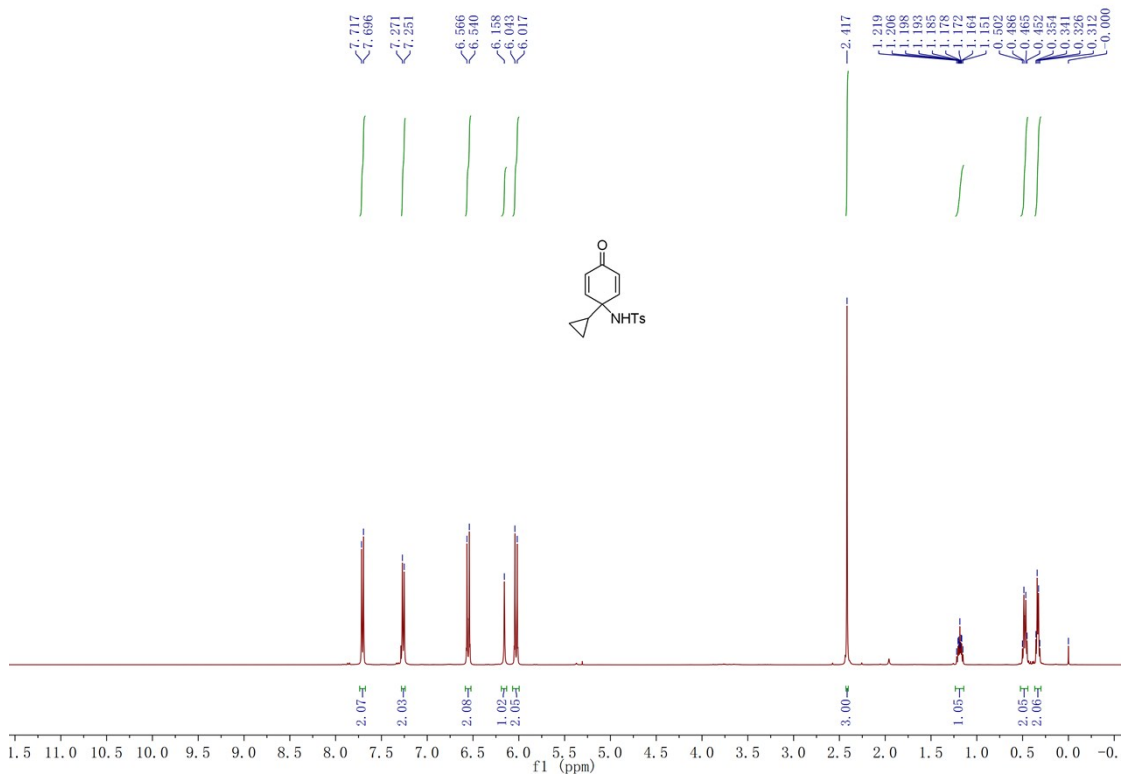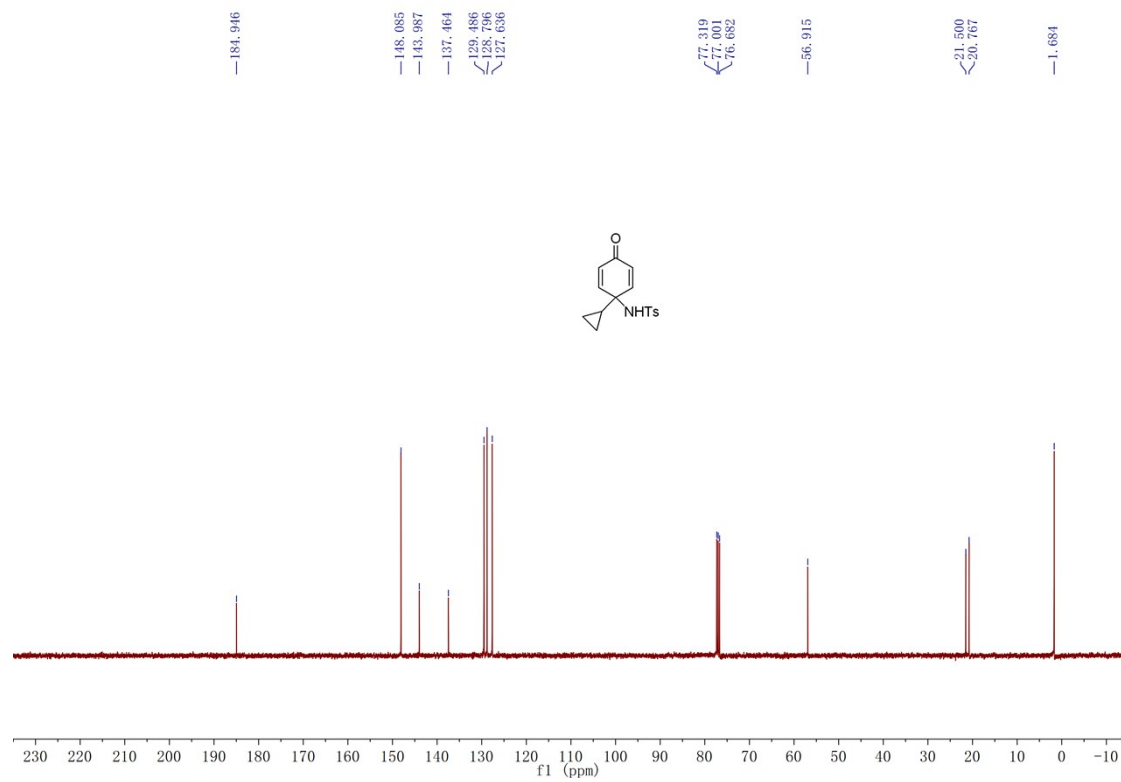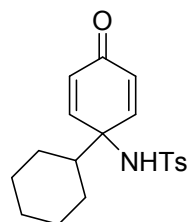

### Compound 1h:

8.0 mmol scale, a white solid, 28% yield (766.7 mg). M.p.: 190-193 °C.  $^1\text{H}$  NMR ( $\text{CDCl}_3$ , TMS, 400 MHz)  $\delta$  0.85-0.97 (m, 2H), 0.99-1.19 (m, 3H), 1.53-1.64 (m, 2H), 1.71-1.76 (m, 2H), 1.82-1.86 (m, 2H), 2.41 (s, 3H), 5.95 (s, 1H), 6.06 (d,  $J = 10.0$  Hz, 2H), 6.58 (d,  $J = 10.0$  Hz, 2H), 7.25 (d,  $J = 8.0$  Hz, 2H), 7.67 (d,  $J = 8.0$  Hz, 2H).  $^{13}\text{C}$  NMR ( $\text{CDCl}_3$ , TMS, 100 MHz)  $\delta$  21.5, 25.9, 26.2, 27.0, 47.5, 60.3, 127.6, 129.5, 129.6, 137.5, 144.0, 148.7, 185.3. IR (neat)  $\nu$  3241, 3069, 2930, 2908, 2851, 1775, 1663, 1620, 1455, 1405, 1390, 1364, 1337, 1216, 1179, 1155, 1090, 1064, 1045, 1028, 979, 937, 893, 865, 845, 811, 713, 653  $\text{cm}^{-1}$ . HRMS (ESI) Calcd. for  $\text{C}_{19}\text{H}_{27}\text{N}_2\text{O}_3\text{S}^+(\text{M}+\text{NH}_4)^+$  requires: 363.1737, Found: 363.1733.

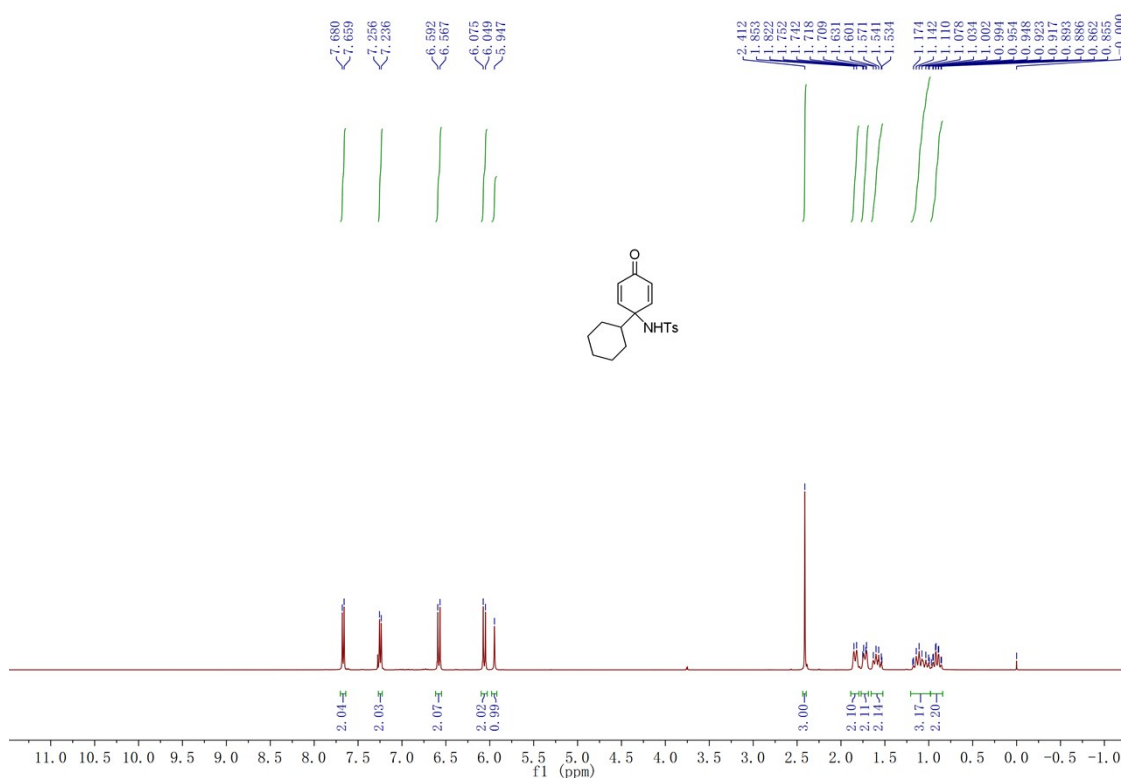

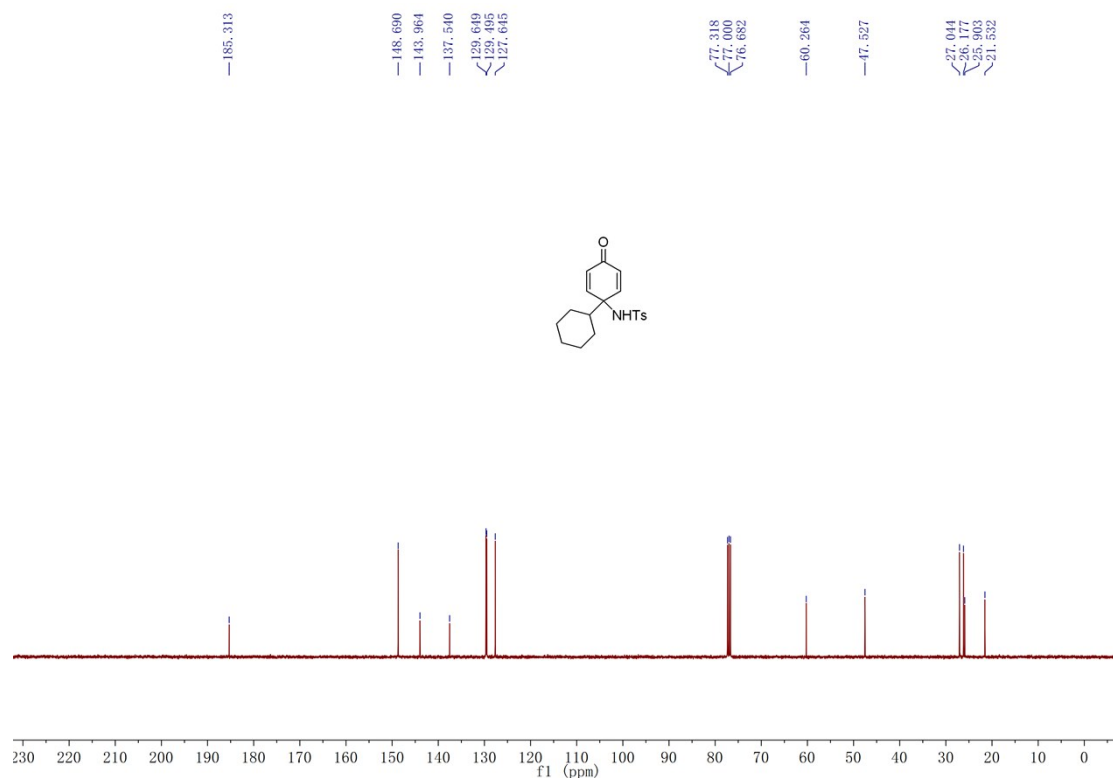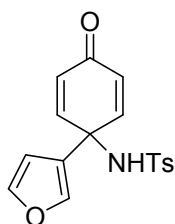

### Compound 1p:

10.0 mmol scale, a brown solid, 79% yield (2.5991 g). M.p.: 165-168 °C. <sup>1</sup>H NMR (CDCl<sub>3</sub>, TMS, 400 MHz) δ 2.43 (s, 3H), 5.76 (s, 1H), 6.06 (d, *J* = 10.0 Hz, 2H), 6.31 (s, 1H), 6.79 (d, *J* = 10.0 Hz, 2H), 7.26 (d, *J* = 8.0 Hz, 2H), 7.37 (d, *J* = 6.4 Hz, 2H), 7.67 (d, *J* = 8.0 Hz, 2H). <sup>13</sup>C NMR (CDCl<sub>3</sub>, TMS, 100 MHz) δ 21.6, 54.7, 108.2, 124.1, 127.8, 127.9, 129.6, 137.2, 139.6, 144.25, 144.33, 147.9, 184.5. IR (neat) ν 3237, 3144, 3063, 2961, 1924, 2866, 1667, 1625, 1598, 1497, 1396, 1380, 1331, 1159, 1089, 1027, 1005, 938, 913, 873, 836, 814, 774, 734, 705, 665 cm<sup>-1</sup>. HRMS (ESI) Calcd. for C<sub>17</sub>H<sub>15</sub>NO<sub>4</sub>SNa<sup>+1</sup>(M+Na)<sup>+</sup> requires: 352.0614, Found: 352.0612.

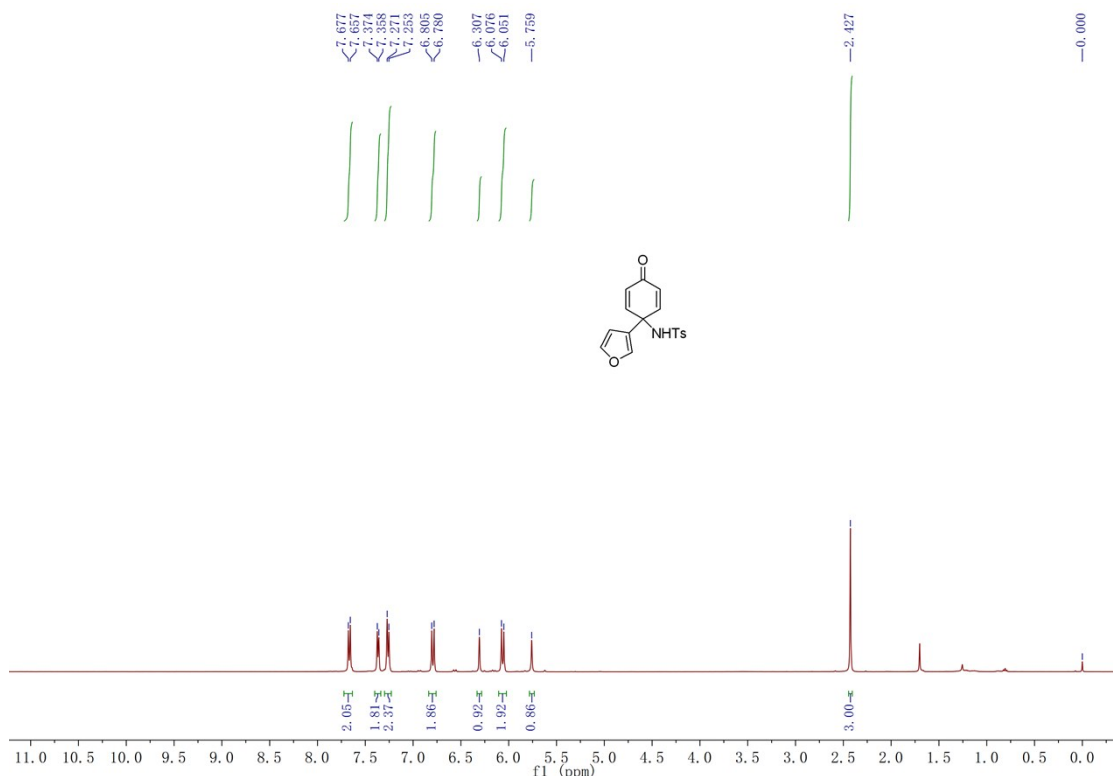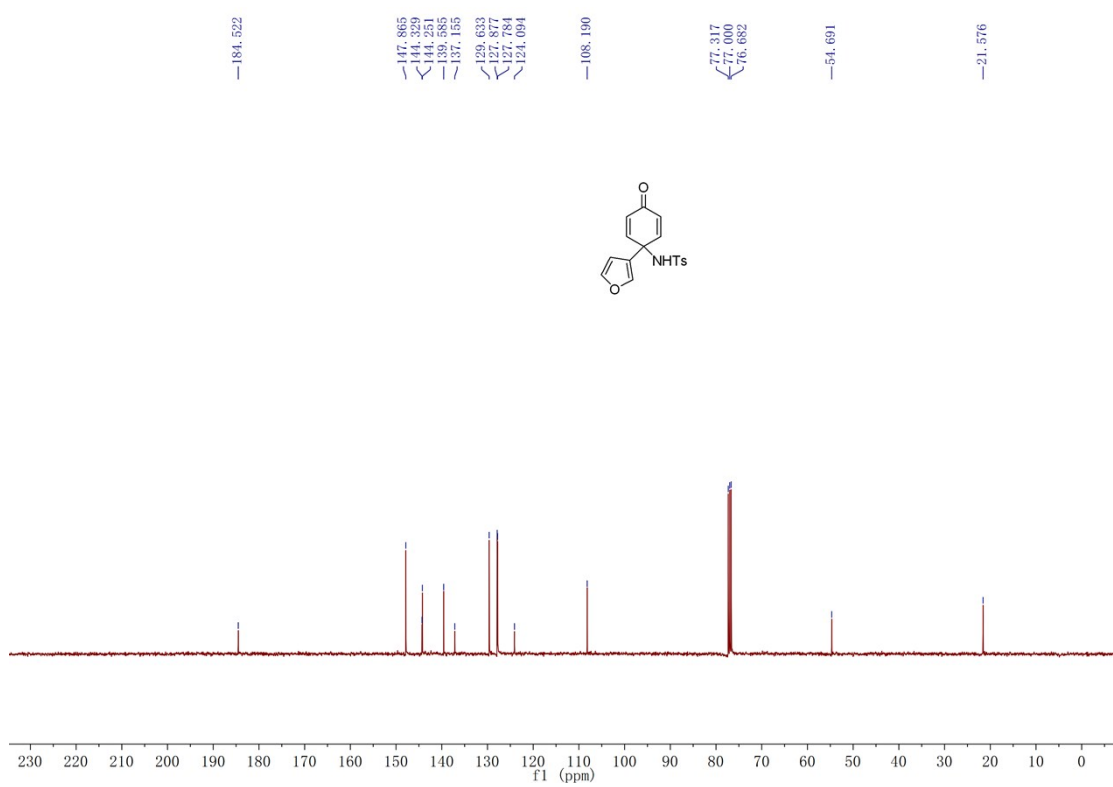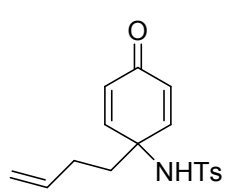

Compound 1q:

8.0 mmol scale, a white solid, 36% yield (904.6 mg). M.p.: 148-150 °C. <sup>1</sup>H NMR (CDCl<sub>3</sub>, TMS, 400 MHz) δ 1.78-1.84 (m, 2H), 1.90-1.97 (m, 2H), 2.42 (s, 3H), 4.91-4.93 (m, 1H), 4.95-4.97 (m, 1H), 5.58-5.69 (m, 1H), 6.08 (d, *J* = 10.0 Hz, 2H), 6.09 (s, 1H), 6.61 (d, *J* = 10.0 Hz, 2H), 7.27 (d, *J* = 8.0 Hz, 2H), 7.69 (d, *J* = 8.0 Hz, 2H). <sup>13</sup>C NMR (CDCl<sub>3</sub>, TMS, 100 MHz) δ 21.5, 27.3, 39.1, 57.5, 116.0, 127.7, 129.3, 129.6, 136.1, 137.3, 144.2, 149.3, 185.0. IR (neat) ν 3105, 3073, 3002, 2981, 2902, 2919, 2853, 1660, 1614, 1493, 1472, 1444, 1402, 1388, 1341, 1310, 1295, 1253, 1180, 1157, 1123, 1090, 1045, 1022, 999, 966, 921, 869, 843, 811, 711, 652 cm<sup>-1</sup>. HRMS (ESI) Calcd. for C<sub>17</sub>H<sub>19</sub>NO<sub>3</sub>SNa<sup>+</sup>(M+Na)<sup>+</sup> requires: 340.0978, Found: 340.0977.

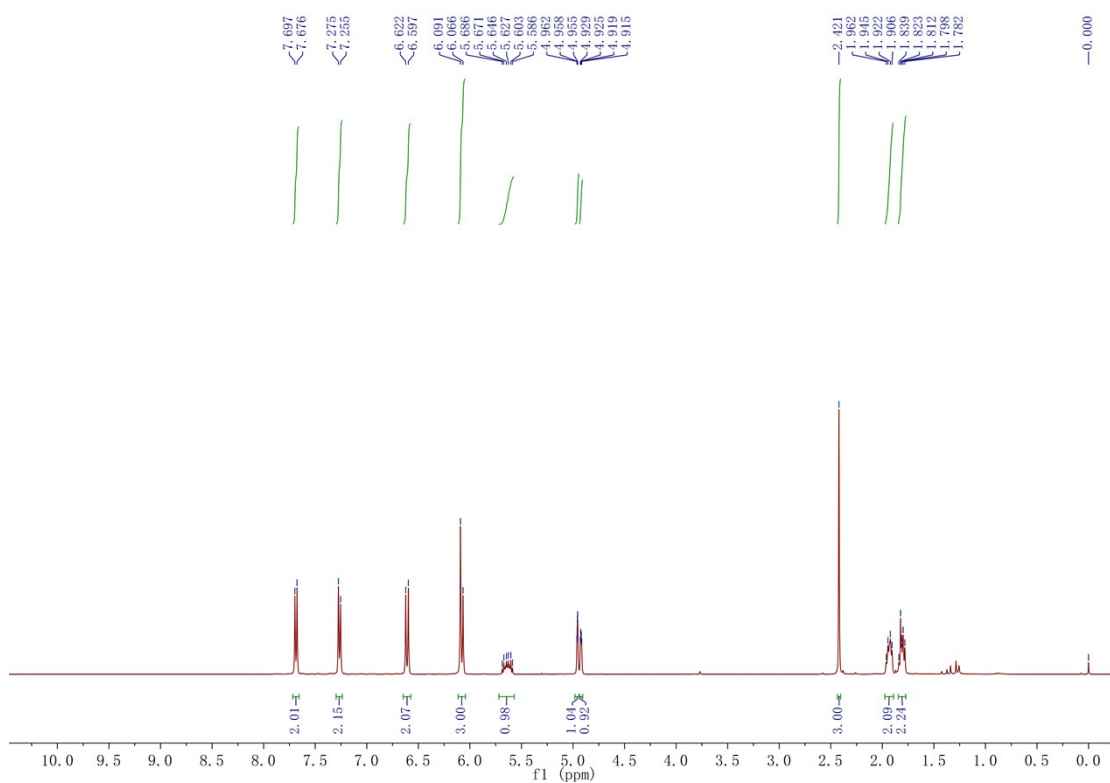

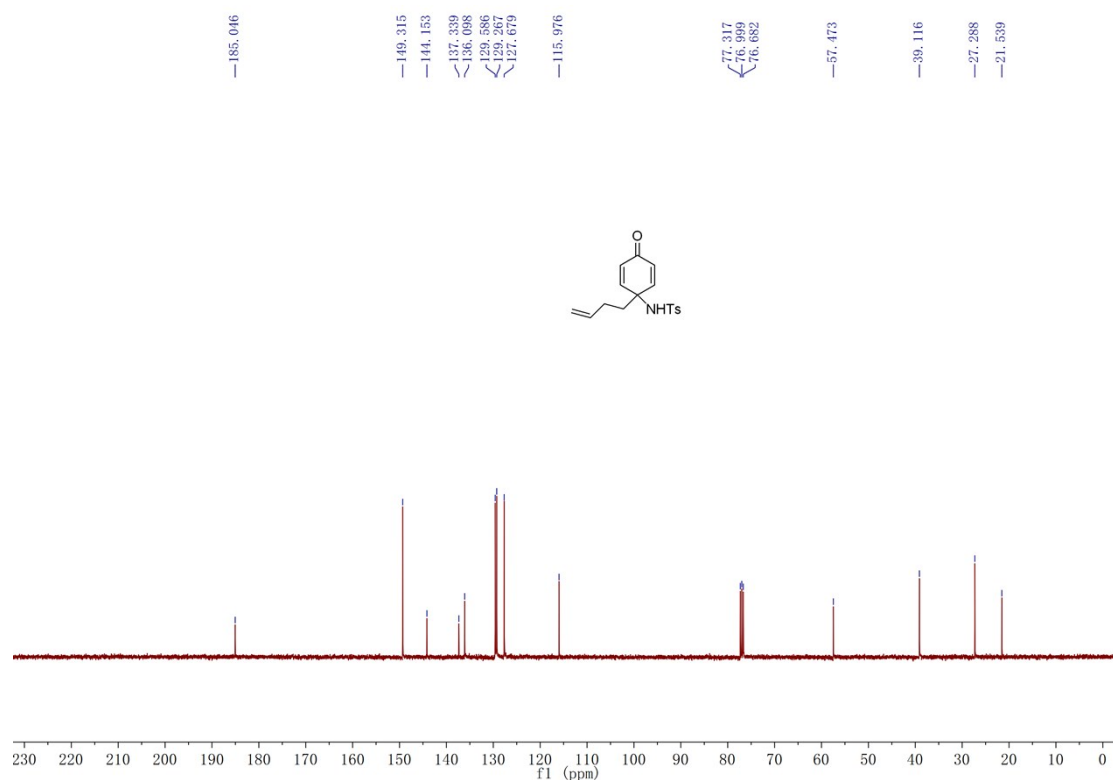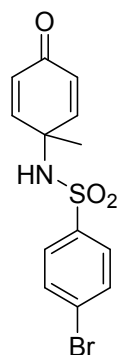

### Compound 1r:

8.0 mmol scale, a white solid, 39% yield (1.0710 g). M.p.: 189-191 °C. <sup>1</sup>H NMR (*d*<sup>6</sup>-DMSO, TMS, 400 MHz) δ 1.37 (s, 3H), 5.92 (d, *J* = 10.0 Hz, 2H), 6.70 (d, *J* = 10.0 Hz, 2H), 7.62 (d, *J* = 8.4 Hz, 2H), 7.77 (d, *J* = 8.4 Hz, 2H), 8.58 (s, 1H). <sup>13</sup>C NMR (*d*<sup>6</sup>-DMSO, TMS, 100 MHz) δ 27.5, 54.4, 127.0, 127.3, 129.5, 132.5, 140.9, 152.2, 184.7. IR (neat) ν 3228, 3140, 2945, 2882, 2851, 2764, 2715, 1661, 1616, 1574, 1468, 1427, 1404, 1387, 1365, 1339, 1289, 1249, 1187, 1170, 1157, 1141, 1099, 1088, 1069, 1043, 1008, 998, 987, 966, 941, 882, 864, 829, 813, 779, 738, 702, 667 cm<sup>-1</sup>. HRMS (ESI) Calcd. for C<sub>13</sub>H<sub>13</sub>BrNO<sub>3</sub>S<sup>+</sup>(M+H)<sup>+</sup> requires: 341.9794, Found: 341.9790.

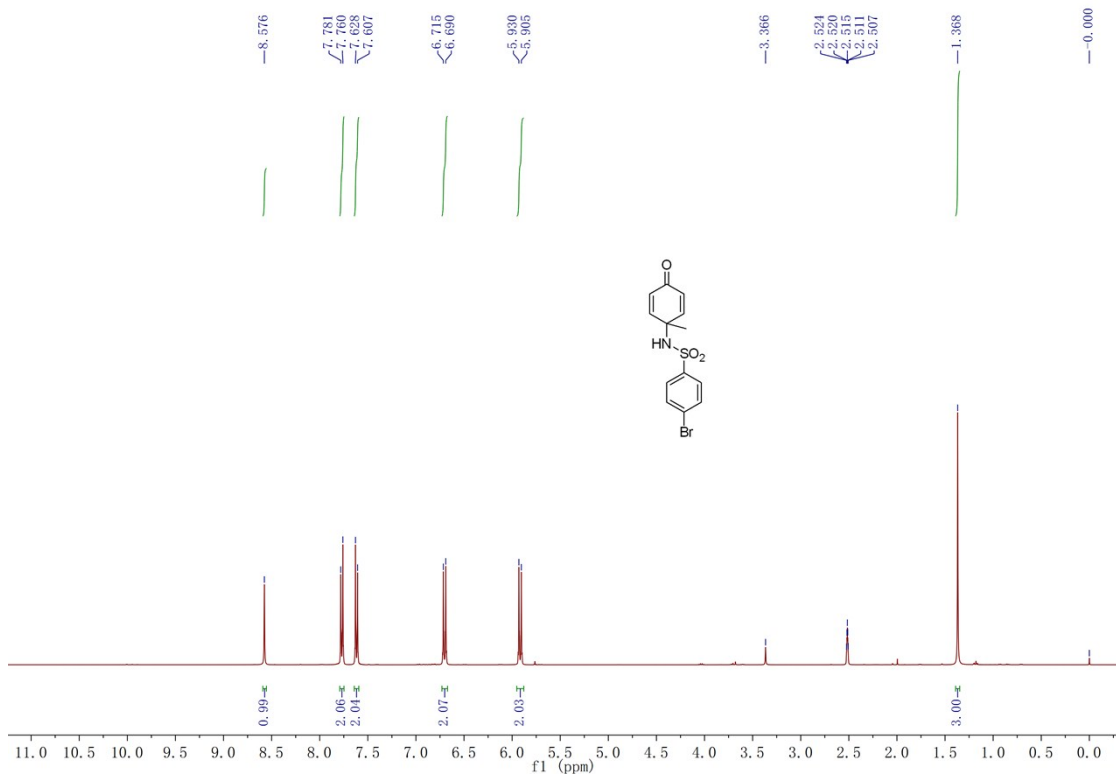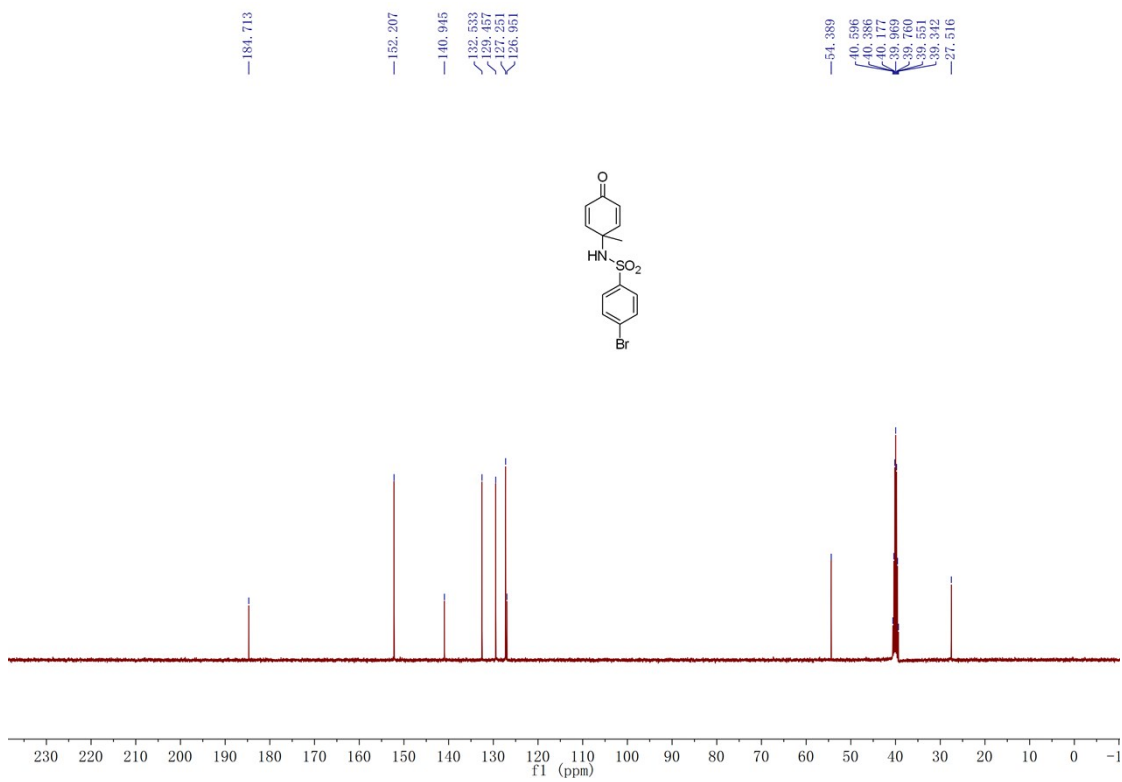

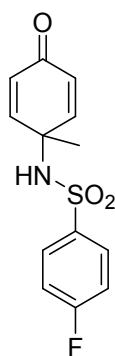

### Compound 1s:

8.0 mmol scale, a yellow solid, 66% yield (1.4845 g). M.p.: 175-178 °C.  $^1\text{H}$  NMR ( $d^6$ -DMSO, TMS, 400 MHz)  $\delta$  1.36 (s, 3H), 5.90 (d,  $J = 10.0$  Hz, 2H), 6.69 (d,  $J = 10.0$  Hz, 2H), 7.36-7.41 (m, 2H), 7.71-7.77 (m, 2H), 8.50 (s, 1H).  $^{13}\text{C}$  NMR ( $d^6$ -DMSO, TMS, 100 MHz)  $\delta$  27.6, 54.3, 116.6 (d,  $J = 22.6$  Hz), 127.2, 130.5 (d,  $J = 9.6$  Hz), 137.9 (d,  $J = 3.1$  Hz), 152.3, 164.6 (d,  $J = 249.6$  Hz), 184.7.  $^{19}\text{F}$  NMR ( $d^6$ -DMSO,  $\text{CFCl}_3$ , 376 MHz)  $\delta$  -106.46- -106.38 (m). IR (neat)  $\nu$  3222, 3109, 3084, 3065, 3008, 2976, 2932, 2873, 2832, 2817, 2775, 1715, 1665, 1621, 1601, 1589, 1492, 1455, 1441, 1399, 1382, 1337, 1295, 1247, 1223, 1187, 1166, 1154, 1143, 1101, 1091, 1048, 1014, 1002, 988, 940, 861, 842, 822, 747, 709, 674  $\text{cm}^{-1}$ . HRMS (ESI) Calcd. for  $\text{C}_{13}\text{H}_{13}\text{FNO}_3\text{S}^+(\text{M}+\text{H})^+$  requires: 282.0595, Found: 282.0597.

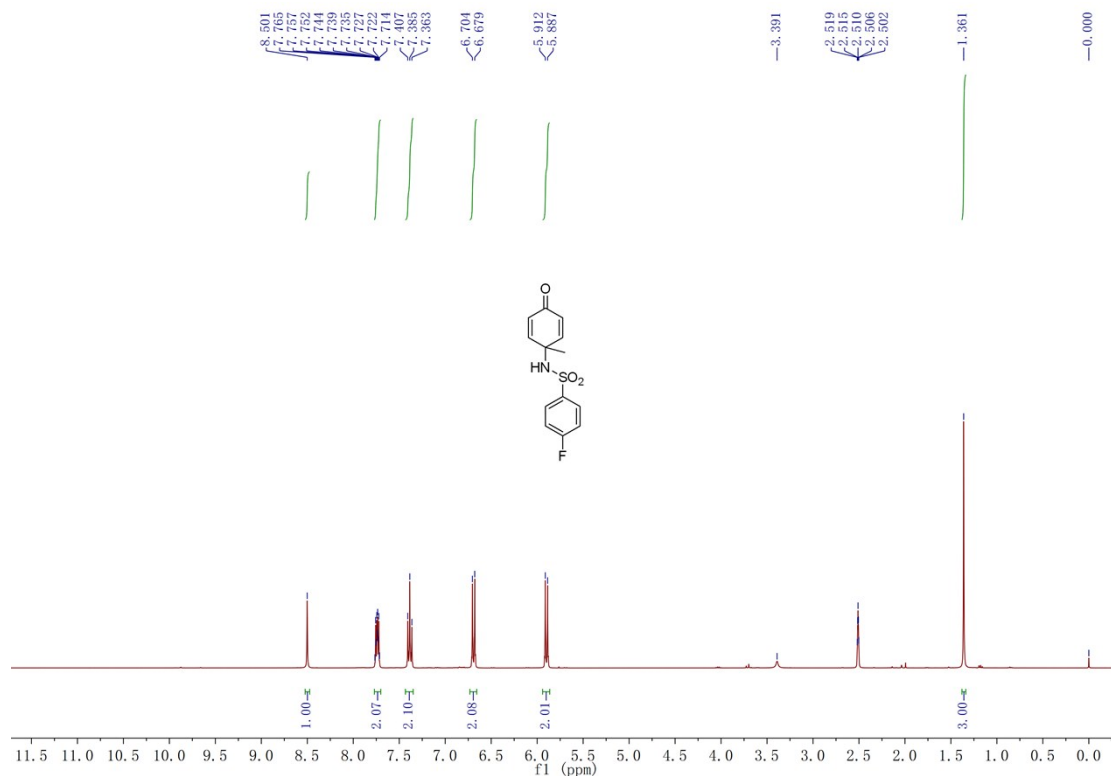



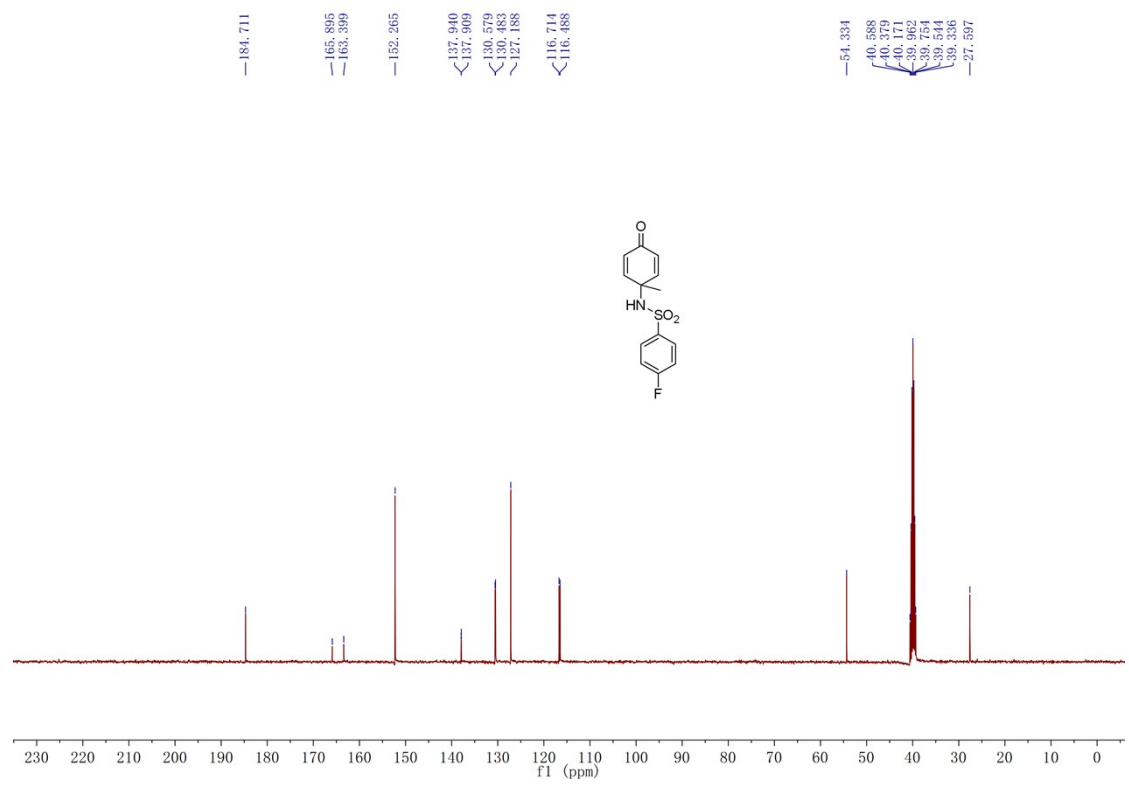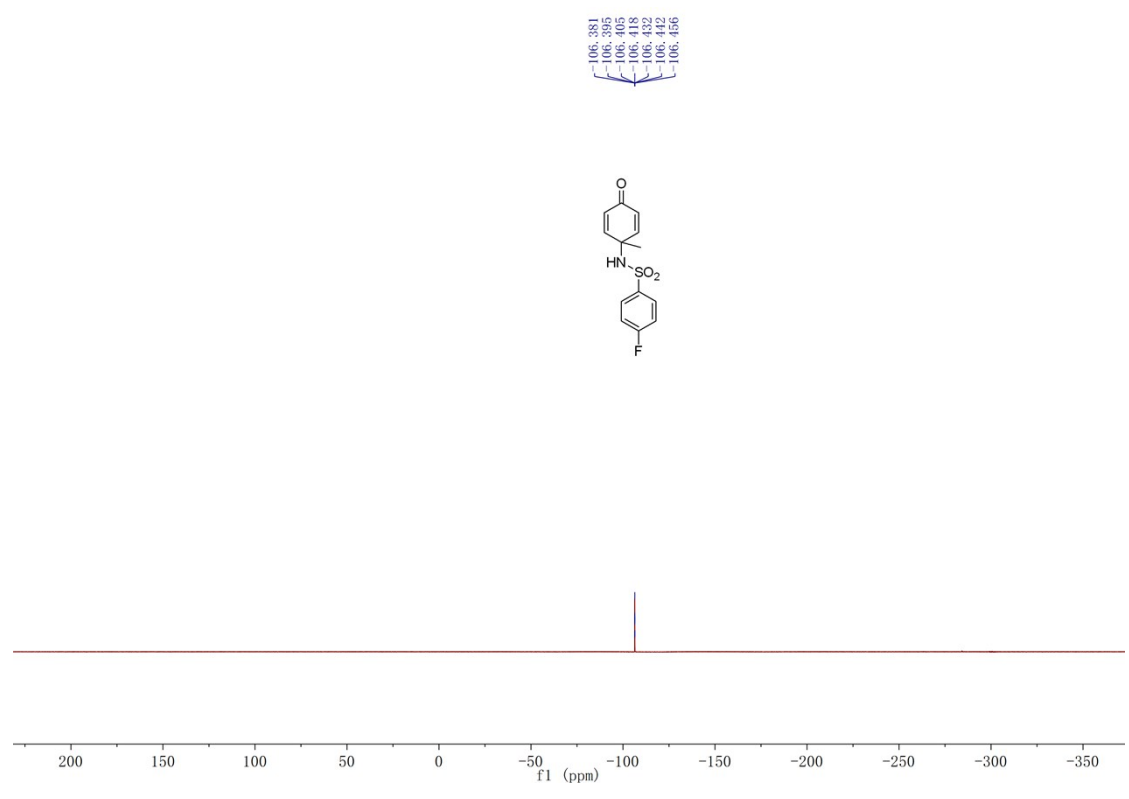

#### 4. General procedure for the Mitsunobu-initiated cascade polycyclization.

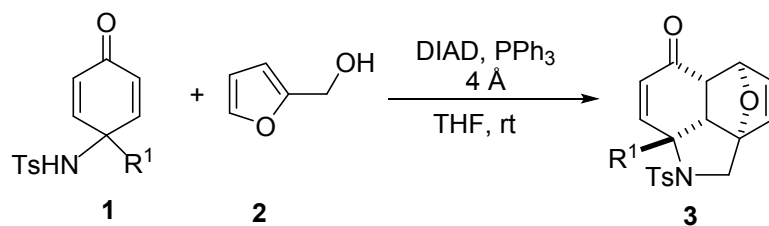

To a solution of **1** (0.3 mmol, 1.0 equiv.), 2-furanylmethanol **2** (39  $\mu$ L, 0.45 mmol, 1.5 equiv.), triphenylphosphane (94.3 mg, 0.36 mmol, 1.2 equiv.) and 4 Å molecular sieves (200 mg) in THF (3.0 mL), (65  $\mu$ L, 0.33 mmol, 1.1 equiv.), DIAD was added dropwise at 0 °C. The resulting mixture was allowed to warm to room temperature and was stirred for 12 hours. Then, the resulting solution was concentrated in vacuum and the residue was purified by a silica gel flash chromatography (eluent: petroleum ether / ethyl acetate = 8 / 1) to give the desired product **3** as a white solid.

## 5. Characterization and spectra charts for 3.

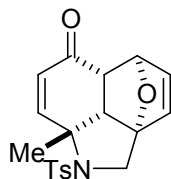

### Compound 3a:

0.30 mmol scale, a light yellow solid, 78% yield (83.5 mg). M.p.: 150-153 °C.  $^1\text{H}$  NMR ( $\text{CDCl}_3$ , TMS, 400 MHz)  $\delta$  1.77 (s, 3H), 2.39 (dd,  $J = 0.8$  Hz, 8.0 Hz, 1H), 2.42 (s, 3H), 2.49 (d,  $J = 8.0$  Hz, 1H), 3.90 (s, 2H), 4.99 (d,  $J = 2.0$  Hz, 1H), 6.01 (d,  $J = 10.4$  Hz, 1H), 6.41 (d,  $J = 5.6$  Hz, 1H), 6.51 (dd,  $J = 2.0$  Hz, 5.6 Hz, 1H), 7.31 (d,  $J = 8.0$  Hz, 2H), 7.37 (dd,  $J = 0.8$  Hz, 10.4 Hz, 1H), 7.75 (d,  $J = 8.0$  Hz, 2H).  $^{13}\text{C}$  NMR ( $\text{CDCl}_3$ , TMS, 100 MHz)  $\delta$  21.4, 30.5, 47.8, 49.3, 53.9, 63.2, 85.0, 93.7, 126.8, 127.0, 129.6, 135.1, 137.2, 137.4, 143.5, 150.9, 196.7. IR (neat)  $\nu$  3073, 3052, 3031, 3004, 2974, 2916, 2906, 2848, 1671, 1620, 1595, 1495, 1474, 1391, 1375, 1335, 1313, 1273, 1233, 1200, 1155, 1143, 1121, 1104, 1090, 1065, 1055, 1017, 987, 925, 910, 877, 858, 841, 818, 768, 725, 712, 689, 665  $\text{cm}^{-1}$ . HRMS (ESI) Calcd. for  $\text{C}_{19}\text{H}_{23}\text{N}_2\text{O}_4\text{S}^{+1}(\text{M}+\text{NH}_4)^+$  requires: 375.1373, found: 375.1373.

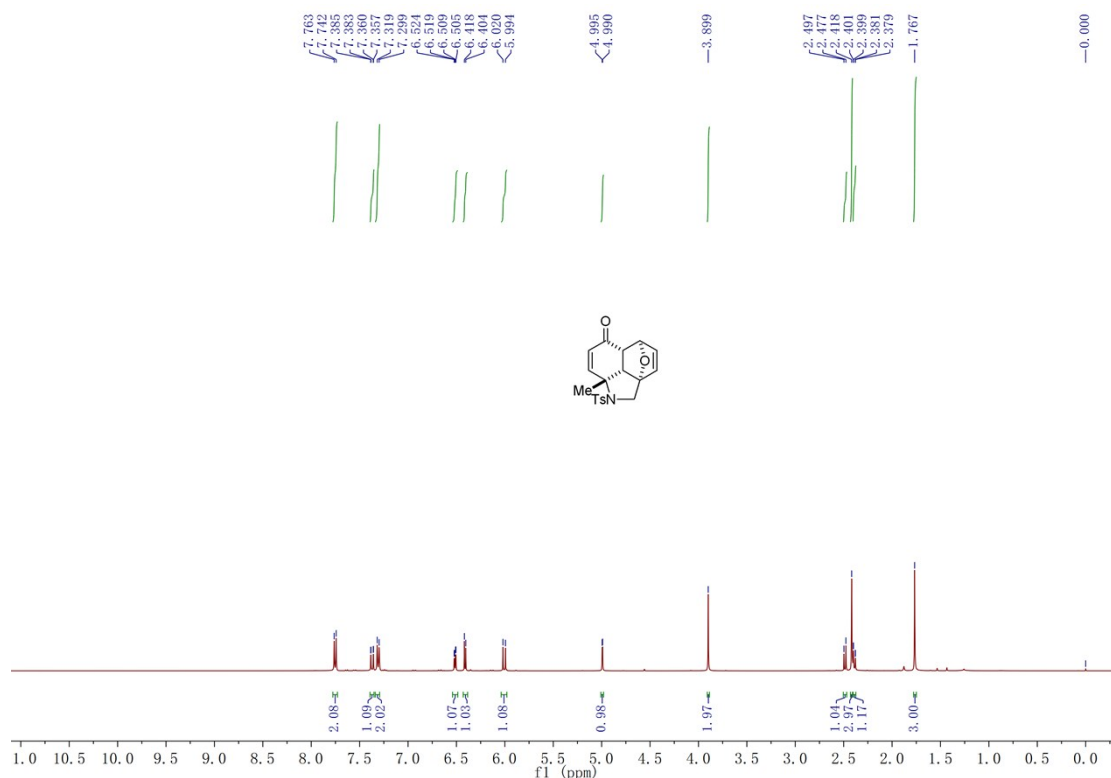

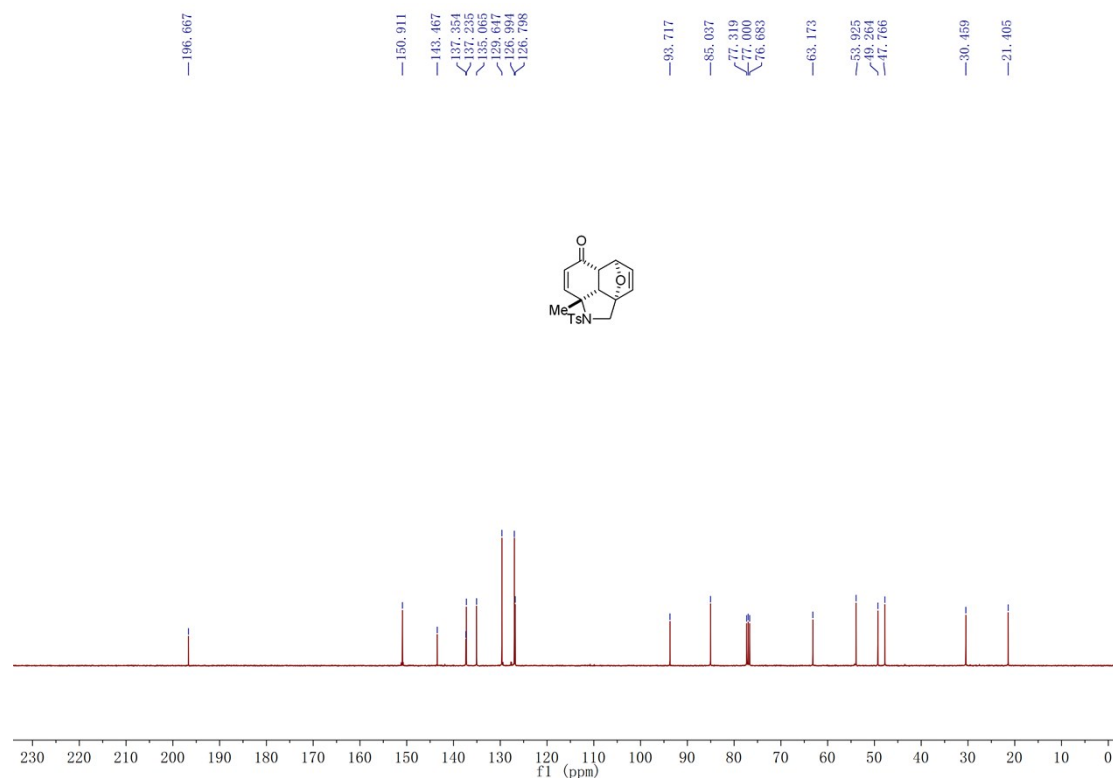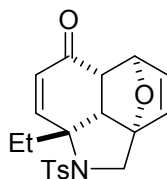

### Compound 3b:

0.30 mmol scale, a white solid, 77% yield (85.2 mg). M.p.: 128-130 °C. <sup>1</sup>H NMR (CDCl<sub>3</sub>, TMS, 400 MHz) δ 0.87 (t, *J* = 7.2 Hz, 3H), 1.96-2.06 (m, 1H), 2.32-2.41 (m, 5H), 2.45 (d, *J* = 8.0 Hz, 1H), 3.87 (d, *J* = 12.0 Hz, 1H), 3.90 (d, *J* = 12.0 Hz, 1H), 5.00 (d, *J* = 1.6 Hz, 1H), 6.13 (d, *J* = 10.4 Hz, 1H), 6.41 (d, *J* = 5.6 Hz, 1H), 6.53 (dd, *J* = 1.6 Hz, 5.6 Hz, 1H), 7.24-7.31 (m, 3H), 7.74 (d, *J* = 8.4 Hz, 2H). <sup>13</sup>C NMR (CDCl<sub>3</sub>, TMS, 100 MHz) δ 8.9, 21.5, 34.5, 48.4, 49.7, 51.0, 67.6, 85.1, 93.9, 127.0, 128.7, 129.7, 135.0, 137.4, 137.6, 143.4, 148.9, 197.0. IR (neat) ν 3057, 2971, 2937, 2927, 2877, 2848, 1667, 1597, 1494, 1460, 1391, 1321, 1262, 1155, 1100, 1063, 991, 951, 925, 888, 866, 841, 813, 777, 733, 722, 706, 671 cm<sup>-1</sup>. HRMS (ESI) Calcd. for C<sub>20</sub>H<sub>25</sub>N<sub>2</sub>O<sub>4</sub>S<sup>+1</sup>(M+NH<sub>4</sub>)<sup>+</sup> requires: 389.1530, found: 389.1528.

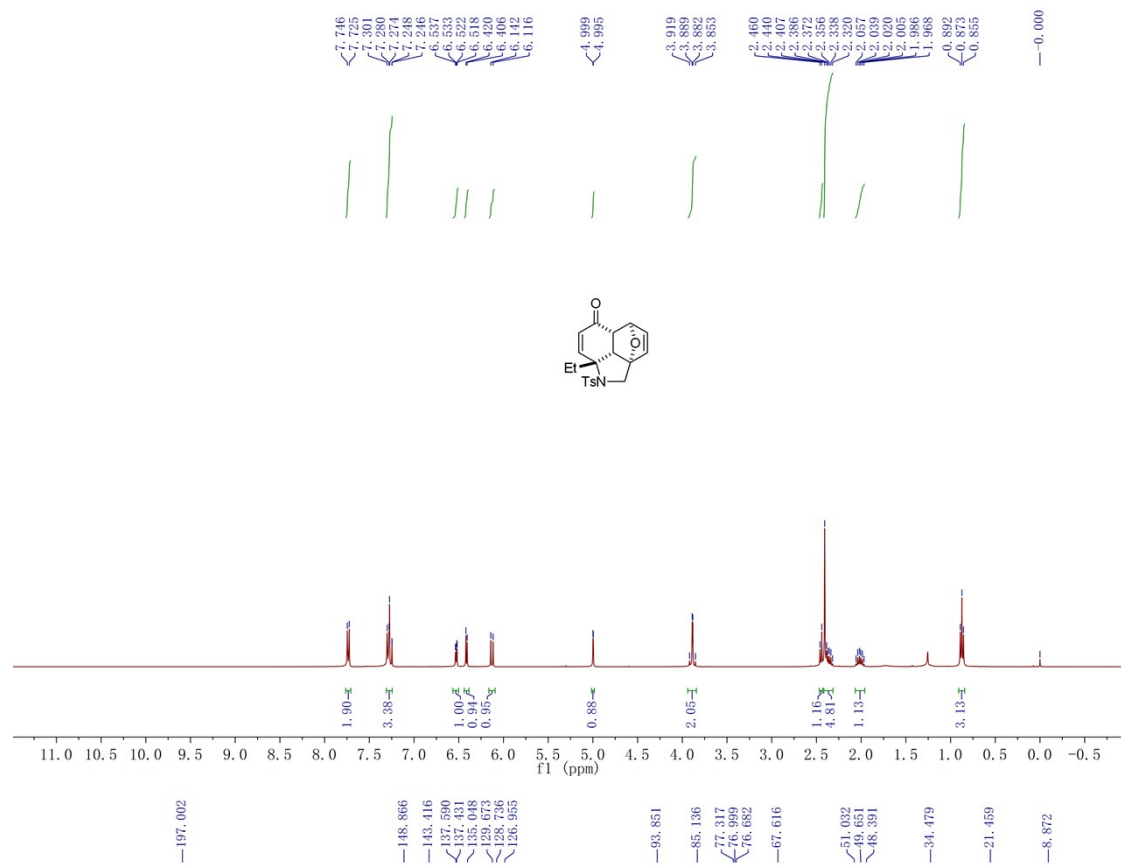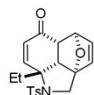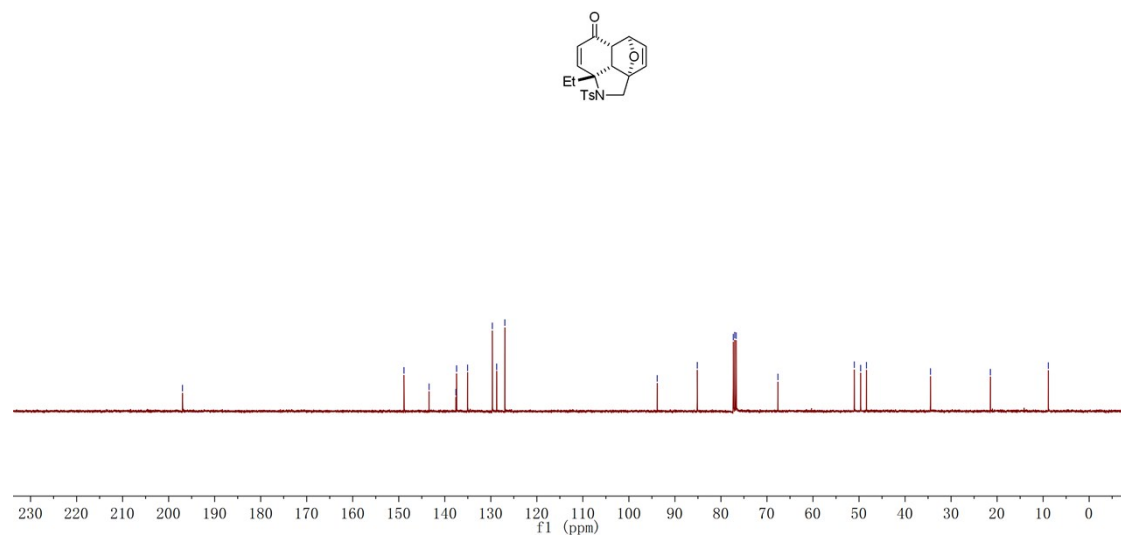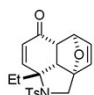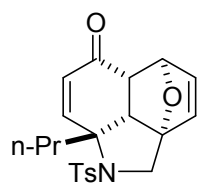

**Compound 3c:**

0.30 mmol scale, a white solid, 73% yield (84.4 mg). M.p.: 148-150 °C. <sup>1</sup>H NMR (CDCl<sub>3</sub>, TMS, 400 MHz) δ 0.94 (t, *J* = 7.2 Hz, 3H), 1.18-1.28 (m, 2H), 1.90-1.98 (m, 1H), 2.30-2.39 (m, 1H), 2.41 (s, 3H), 2.43-2.46 (m, 2H), 3.84 (d, *J* = 12.0 Hz, 1H), 3.89 (d, *J* = 12.0 Hz, 1H), 4.99 (d, *J* = 1.6 Hz, 1H), 6.10 (d, *J* = 10.4 Hz, 1H), 6.41 (d, *J* = 5.6 Hz, 1H), 6.52 (dd, *J* = 1.6 Hz, 5.6 Hz, 1H), 7.27-7.30 (m, 3H), 7.73 (d, *J* = 8.4 Hz, 2H). <sup>13</sup>C NMR (CDCl<sub>3</sub>, TMS, 100 MHz) δ 13.9, 18.0, 21.4, 43.9, 48.4, 49.5, 51.6, 67.0, 85.1, 93.9, 127.0, 128.5, 129.6, 135.0, 137.4, 137.5, 143.4, 149.1, 197.0. IR (neat) ν 3052, 2960, 2927, 2873, 1667, 1597, 1494, 1458, 1390, 1338, 1319, 1231, 1155, 1142, 1103, 1087, 1070, 992, 926, 874, 845, 814, 780, 734, 706, 673 cm<sup>-1</sup>. HRMS (ESI) Calcd. for C<sub>21</sub>H<sub>27</sub>N<sub>2</sub>O<sub>4</sub>S<sup>+</sup>(M+NH<sub>4</sub>)<sup>+</sup> requires: 403.1686, found: 403.1684.

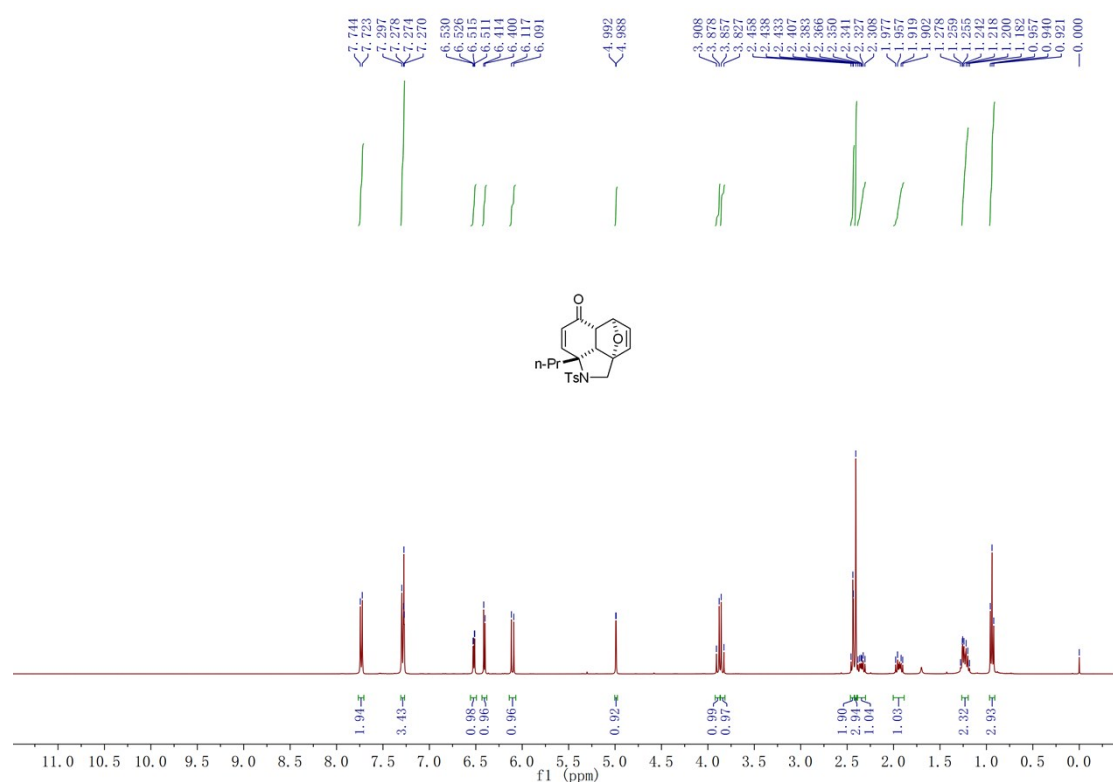

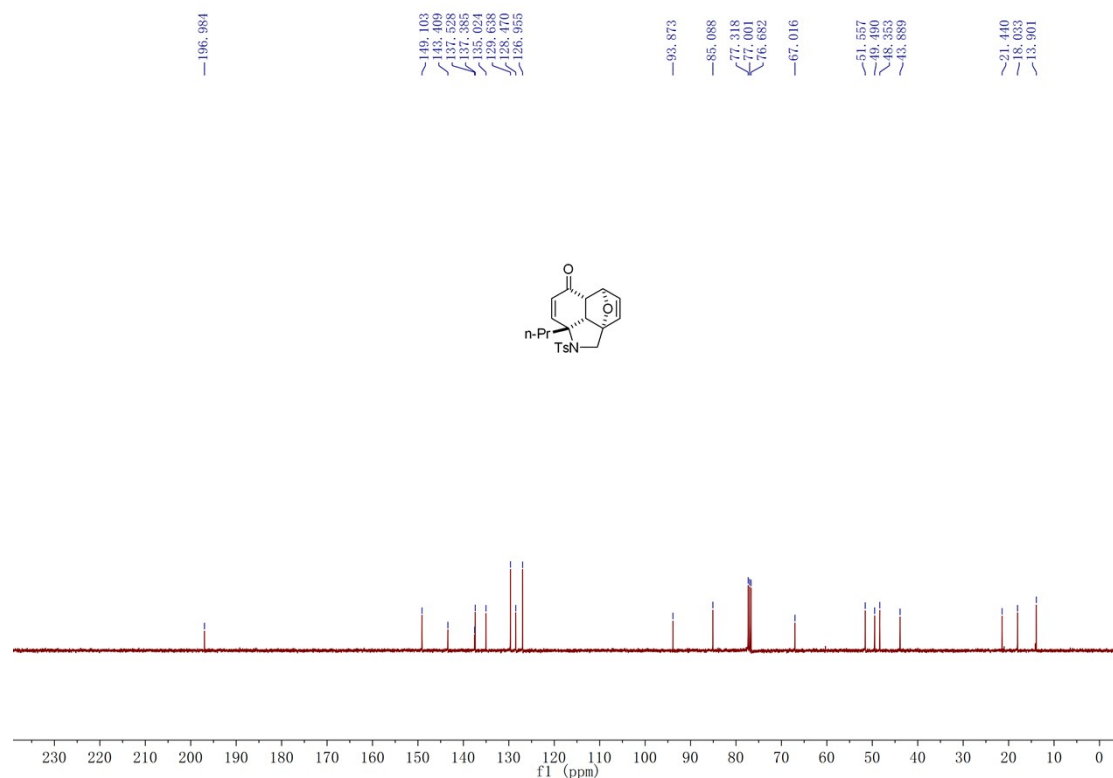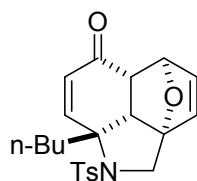

### Compound 3d:

0.30 mmol scale, a white solid, 84% yield (100.3 mg). M.p.: 102-103 °C.  $^1\text{H}$  NMR ( $\text{CDCl}_3$ , TMS, 400 MHz)  $\delta$  0.88 (t,  $J = 7.2$  Hz, 3H), 1.10-1.22 (m, 2H), 1.27-1.39 (m, 2H), 1.91-1.99 (m, 1H), 2.31-2.47 (m, 6H), 3.86 (d,  $J = 11.6$  Hz, 1H), 3.90 (d,  $J = 11.6$  Hz, 1H), 4.99 (d,  $J = 1.6$  Hz, 1H), 6.10 (d,  $J = 10.8$  Hz, 1H), 6.41 (d,  $J = 5.6$  Hz, 1H), 6.52 (dd,  $J = 1.6$  Hz, 5.6 Hz, 1H), 7.27-7.30 (m, 3H), 7.73 (d,  $J = 8.4$  Hz, 2H).  $^{13}\text{C}$  NMR ( $\text{CDCl}_3$ , TMS, 100 MHz)  $\delta$  13.9, 21.4, 22.6, 26.7, 41.5, 48.4, 49.5, 51.5, 57.0, 85.1, 93.9, 127.0, 128.5, 129.6, 135.0, 137.4, 137.6, 143.4, 149.2, 197.0. IR (neat)  $\nu$  3055, 2957, 2929, 2870, 1668, 1597, 1494, 1461, 1390, 1320, 1265, 1155, 1104, 1088, 1070, 993, 925, 866, 844, 814, 779, 733, 706, 673  $\text{cm}^{-1}$ . HRMS (ESI) Calcd. for  $\text{C}_{22}\text{H}_{29}\text{N}_2\text{O}_4\text{S}^{+1}(\text{M}+\text{NH}_4)^+$  requires: 417.1843, found: 417.1842.

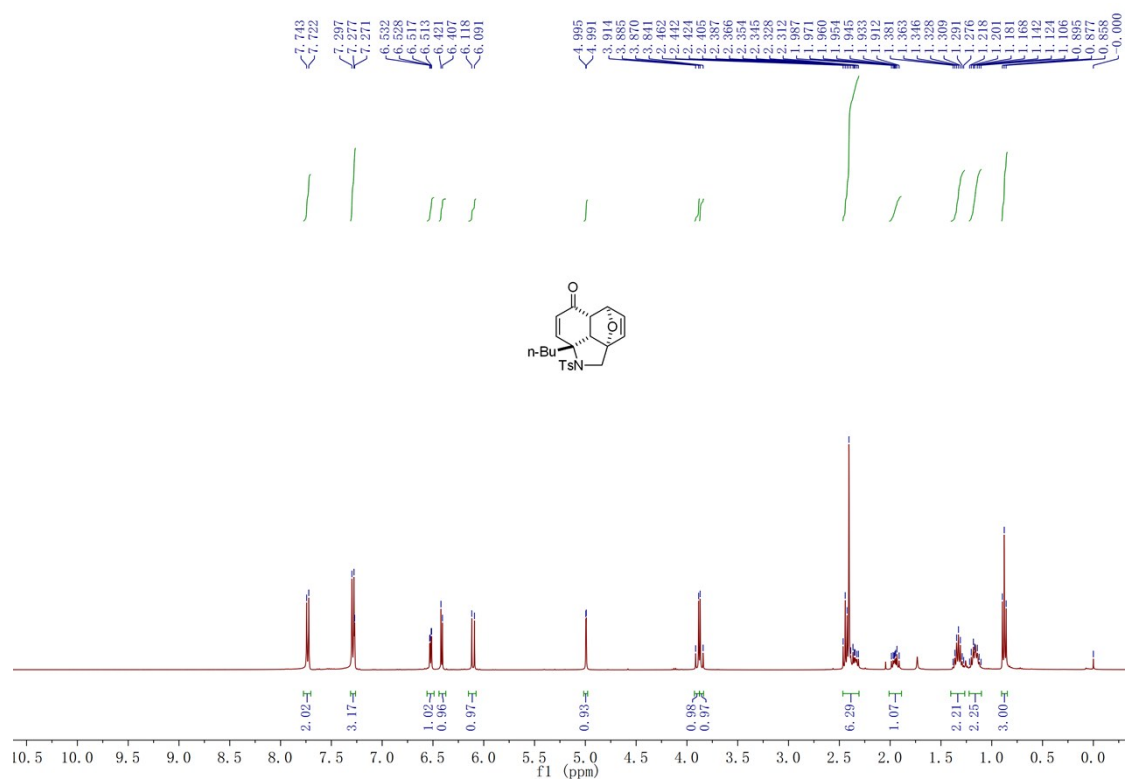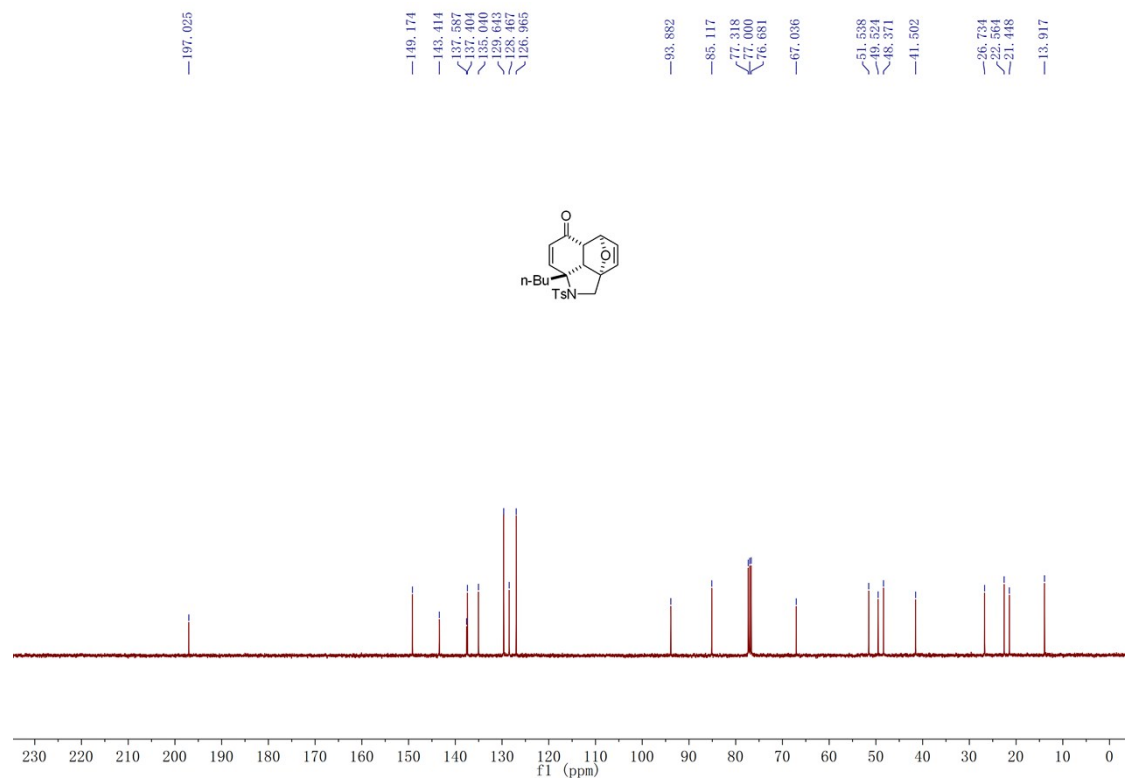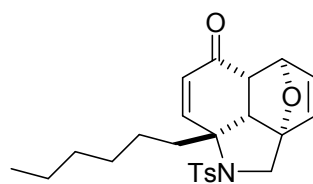

Compound 3e:



0.30 mmol scale, a white solid, 64% yield (81.8 mg). M.p.: 92-93 °C. <sup>1</sup>H NMR (CDCl<sub>3</sub>, TMS, 400 MHz) δ 0.87 (t, *J* = 6.8 Hz, 3H), 1.13-1.32 (m, 8H), 1.90-1.98 (m, 1H), 2.30-2.36 (m, 1H), 2.38-2.42 (m, 4H), 2.45 (d, *J* = 8.0 Hz, 1H), 3.85 (d, *J* = 12.0 Hz, 1H), 3.89 (d, *J* = 12.0 Hz, 1H), 4.99 (d, *J* = 1.2 Hz, 1H), 6.10 (d, *J* = 10.4 Hz, 1H), 6.41 (d, *J* = 5.6 Hz, 1H), 6.52 (dd, *J* = 1.6 Hz, 5.6 Hz, 1H), 7.26-7.30 (m, 3H), 7.73 (d, *J* = 8.4 Hz, 2H). <sup>13</sup>C NMR (CDCl<sub>3</sub>, TMS, 100 MHz) δ 14.0, 21.4, 22.5, 24.6, 29.1, 31.6, 41.7, 48.4, 49.5, 51.5, 67.1, 85.1, 93.9, 127.0, 128.5, 129.6, 135.0, 137.4, 137.6, 143.4, 149.2, 197.0. IR (neat) ν 3055, 2953, 2926, 2857, 1669, 1597, 1494, 1461, 1390, 1320, 1259, 1155, 1106, 1093, 1068, 988, 925, 870, 845, 814, 780, 724, 706, 673 cm<sup>-1</sup>. HRMS (ESI) Calcd. for C<sub>24</sub>H<sub>33</sub>N<sub>2</sub>O<sub>4</sub>S<sup>+</sup>(M+NH<sub>4</sub>)<sup>+</sup> requires: 445.2156, found: 445.2154.

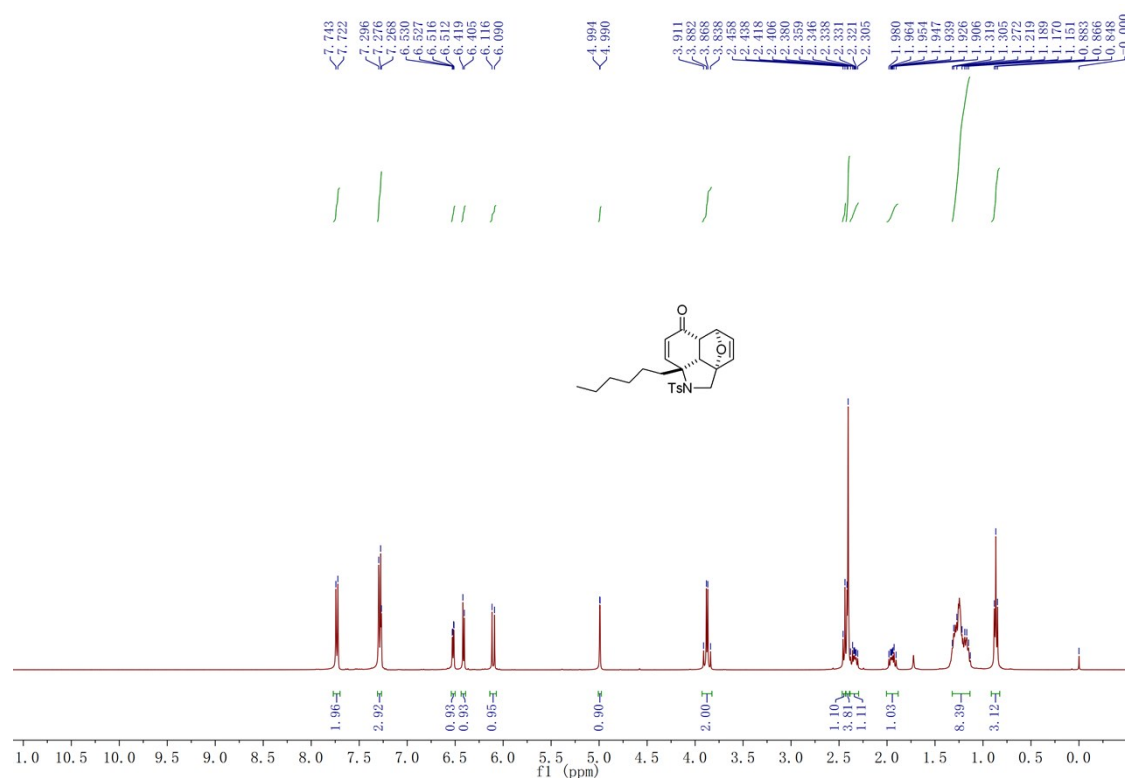

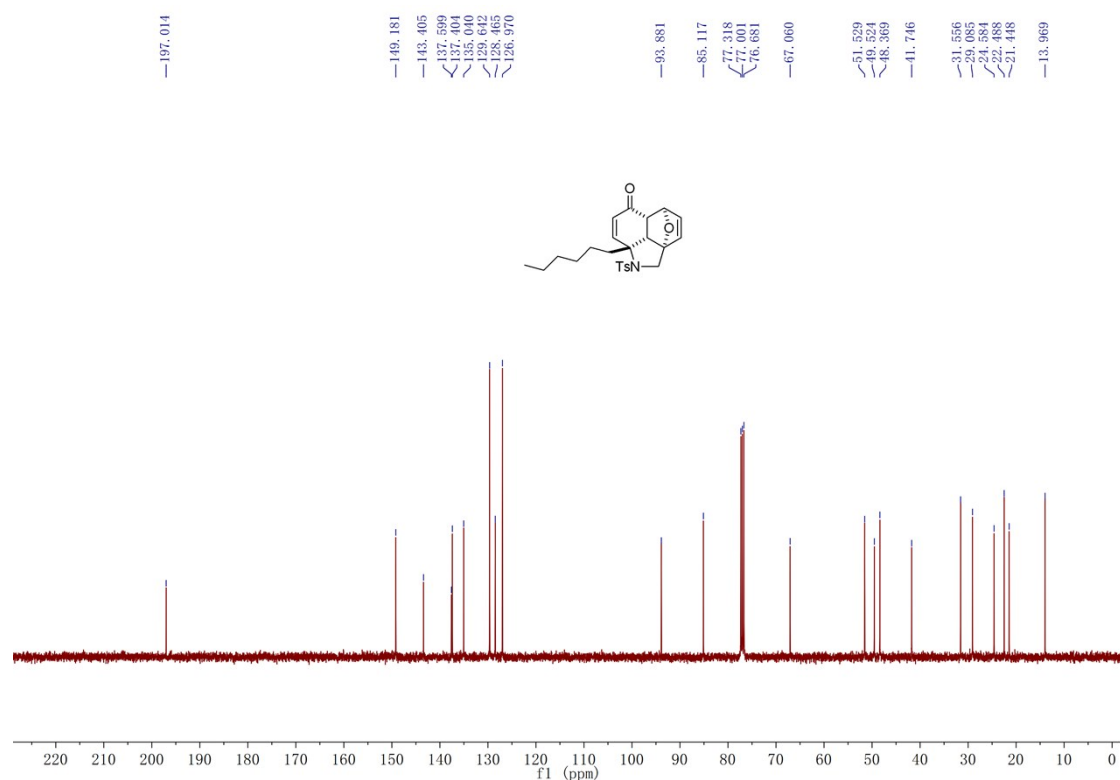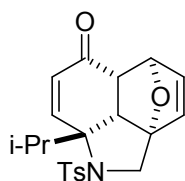

### Compound 3f:

0.30 mmol scale, a light yellow solid, 53% yield (61.6 mg). M.p.: 57-60 °C. <sup>1</sup>H NMR (CDCl<sub>3</sub>, TMS, 400 MHz) δ 0.76 (d, *J* = 6.8 Hz, 3H), 1.19 (d, *J* = 6.8 Hz, 3H), 2.39 (s, 3H), 2.40 (d, *J* = 8.4 Hz, 1H), 2.46 (d, *J* = 8.4 Hz, 1H), 2.77-2.89 (m, 1H), 3.81 (d, *J* = 12.0 Hz, 1H), 3.87 (d, *J* = 12.0 Hz, 1H), 5.01 (d, *J* = 1.2 Hz, 1H), 6.15 (d, *J* = 10.4 Hz, 1H), 6.44 (d, *J* = 5.6 Hz, 1H), 6.54 (dd, *J* = 1.2 Hz, 5.6 Hz, 1H), 7.25-7.30 (m, 3H), 7.70 (d, *J* = 8.4 Hz, 2H). <sup>13</sup>C NMR (CDCl<sub>3</sub>, TMS, 100 MHz) δ 16.1, 17.9, 21.5, 36.3, 45.7, 48.4, 50.4, 70.8, 85.2, 94.0, 126.8, 129.0, 129.7, 135.0, 137.6, 137.7, 143.3, 148.9, 197.2. IR (neat) ν 3060, 2963, 2924, 2877, 2851, 1667, 1597, 1494, 1460, 1391, 1331, 1315, 1265, 1155, 1105, 1086, 1062, 994, 962, 924, 900, 863, 839, 813, 734, 720, 707, 672 cm<sup>-1</sup>. HRMS (ESI) Calcd. for C<sub>21</sub>H<sub>27</sub>N<sub>2</sub>O<sub>4</sub>S<sup>+</sup>(M+NH<sub>4</sub>)<sup>+</sup> requires: 403.1686, found: 403.1680.

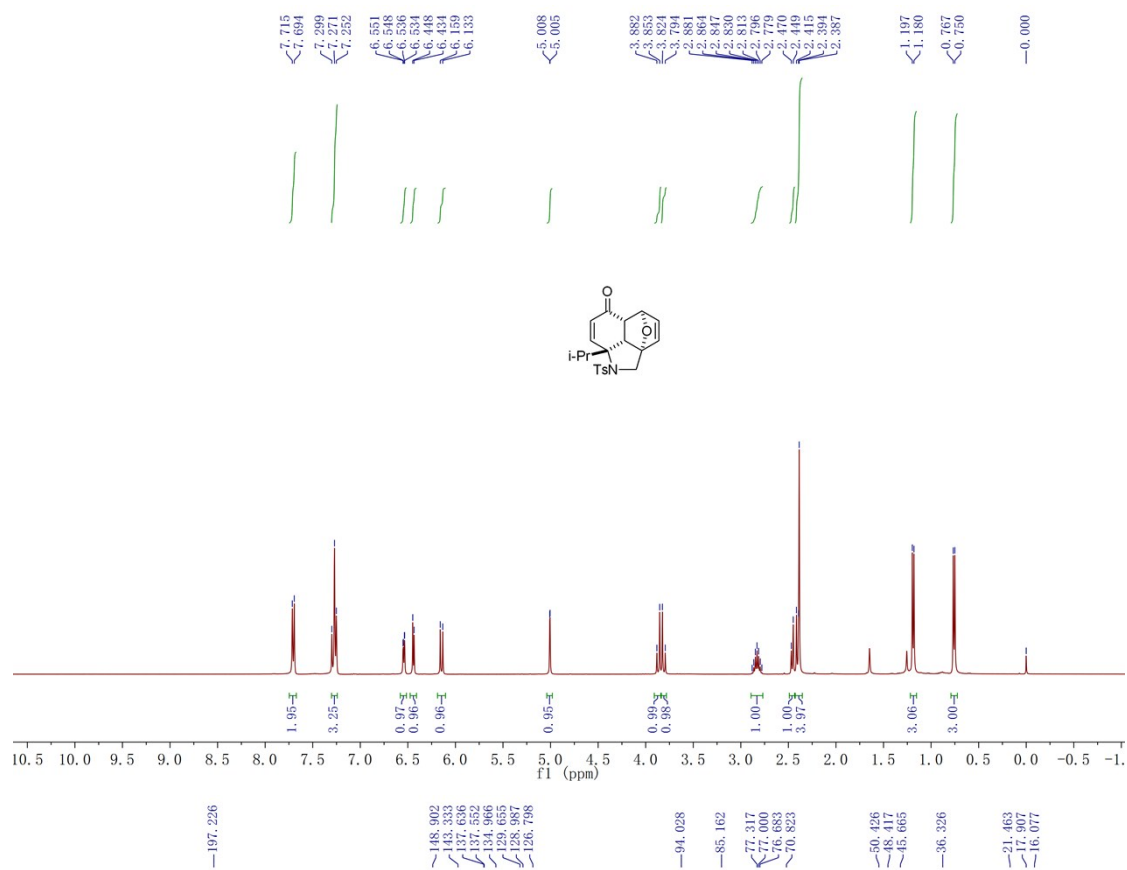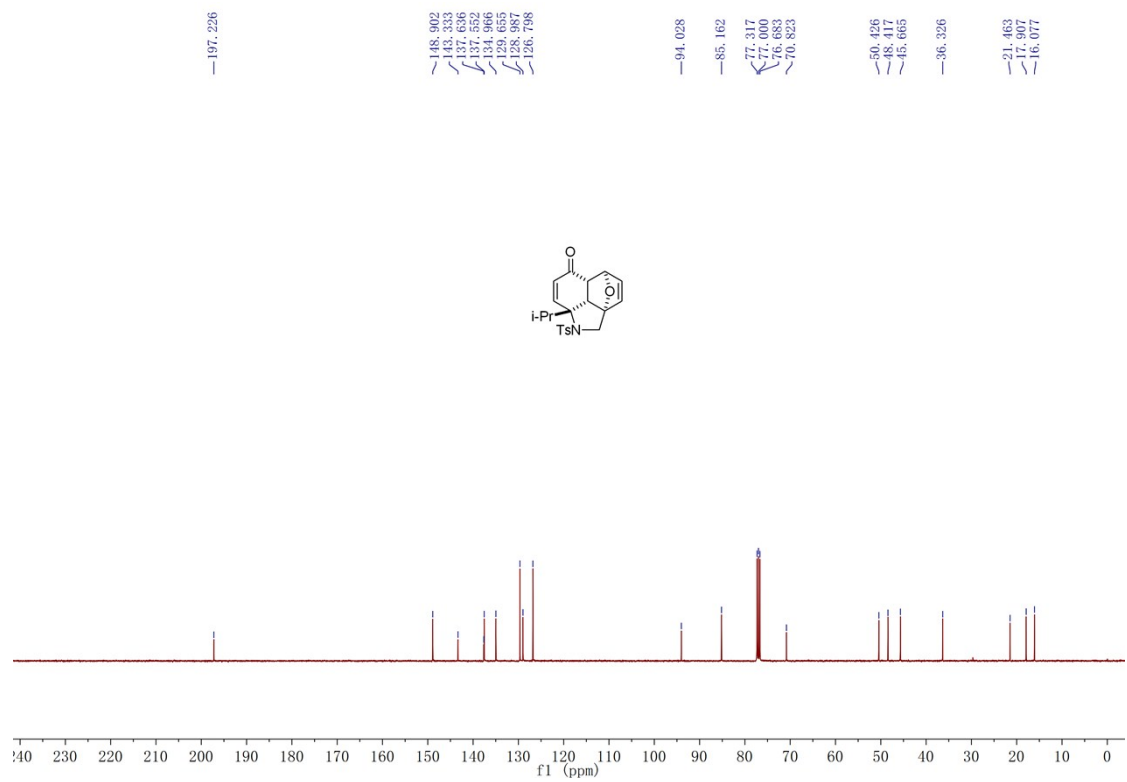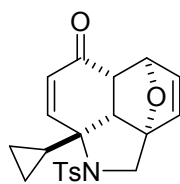

Compound 3g:

0.30 mmol scale, a white solid, 70% yield (80.2 mg). M.p.: 128-129 °C. <sup>1</sup>H NMR (CDCl<sub>3</sub>, TMS, 400 MHz) δ 0.07-0.15 (m, 1H), 0.39-0.55 (m, 2H), 0.60-0.68 (m, 1H), 1.47-1.54 (m, 1H), 2.21 (d, *J* = 8.0 Hz, 1H), 2.39 (d, *J* = 8.0 Hz, 1H), 2.42 (s, 3H), 3.93 (d, *J* = 11.2 Hz, 1H), 4.01 (d, *J* = 11.2 Hz, 1H), 4.96 (d, *J* = 1.2 Hz, 1H), 6.07 (d, *J* = 10.4 Hz, 1H), 6.40 (d, *J* = 6.0 Hz, 1H), 6.51 (dd, *J* = 1.2 Hz, 6.0 Hz, 1H), 7.24 (d, *J* = 10.4 Hz, 1H), 7.30 (d, *J* = 8.0 Hz, 2H), 7.80 (d, *J* = 8.0 Hz, 2H). <sup>13</sup>C NMR (CDCl<sub>3</sub>, TMS, 100 MHz) δ 1.8, 4.3, 21.1, 21.5, 48.2, 49.9, 50.9, 66.7, 85.1, 93.5, 127.1, 128.4, 129.6, 135.3, 137.4, 138.0, 143.4, 147.9, 197.1. IR (neat) ν 3084, 3060, 3006, 2953, 2924, 2869, 1667, 1597, 1494, 1461, 1390, 1335, 1265, 1154, 1133, 1095, 1065, 1019, 989, 924, 879, 864, 839, 814, 777, 733, 721, 707, 671 cm<sup>-1</sup>. HRMS (ESI) Calcd. for C<sub>21</sub>H<sub>22</sub>NO<sub>4</sub>S<sup>+1</sup>(M+H)<sup>+</sup> requires: 384.1264, found: 384.1272.

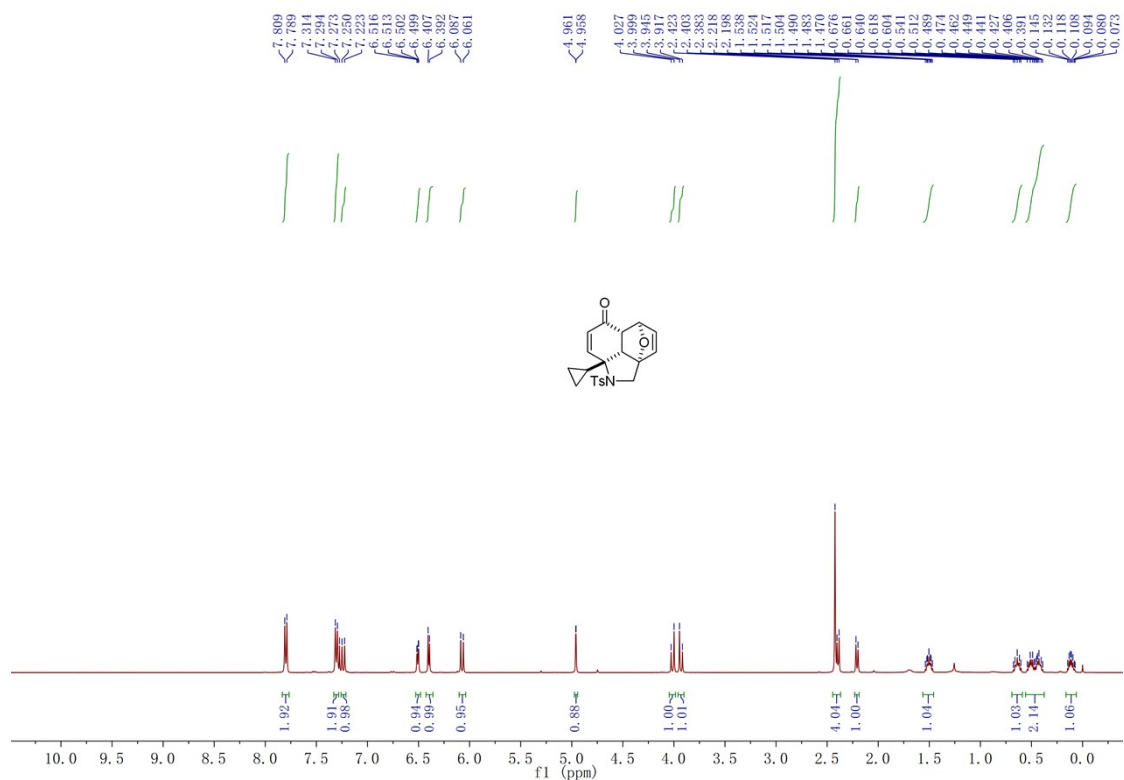

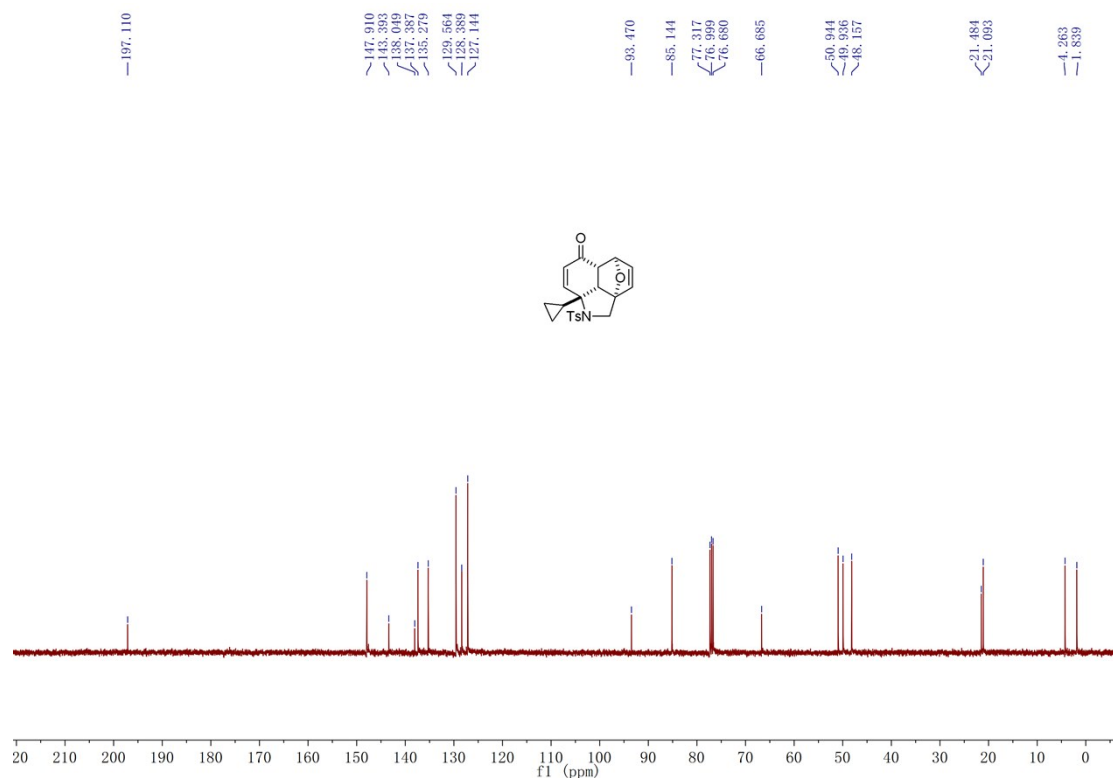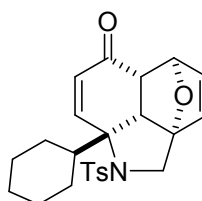

### Compound 3h:

0.30 mmol scale, a white solid, 79% yield (100.3 mg). M.p.: 80-83 °C.  $^1\text{H}$  NMR ( $\text{CDCl}_3$ , TMS, 400 MHz)  $\delta$  0.64-0.75 (m, 1H), 0.99-1.14 (m, 2H), 1.17-1.29 (m, 1H), 1.35-1.53 (m, 2H), 1.69-1.73 (m, 2H), 1.85-1.91 (m, 1H), 2.22-2.29 (m, 1H), 2.37-2.45 (m, 5H), 2.52 (d,  $J = 8.0$  Hz, 1H), 3.83 (s, 2H), 4.99 (d,  $J = 1.2$  Hz, 1H), 6.14 (d,  $J = 10.4$  Hz, 1H), 6.43 (d,  $J = 5.6$  Hz, 1H), 6.53 (dd,  $J = 1.2$  Hz, 5.6 Hz, 1H), 7.23-7.27 (m, 3H), 7.70 (d,  $J = 8.4$  Hz, 2H).  $^{13}\text{C}$  NMR ( $\text{CDCl}_3$ , TMS, 100 MHz)  $\delta$  21.5, 25.7, 25.8, 26.2, 28.1, 46.2, 46.9, 48.3, 50.4, 70.6, 85.1, 94.0, 126.7, 129.1, 129.6, 134.9, 137.5, 137.8, 143.3, 148.8, 197.3. IR (neat)  $\nu$  3057, 2927, 2853, 1666, 1597, 1494, 1450, 1392, 1329, 1317, 1305, 1267, 1232, 1185, 1154, 1114, 1097, 1070, 1047, 993, 962, 924, 906, 892, 869, 852, 841, 829, 814, 780, 734, 709, 666  $\text{cm}^{-1}$ . HRMS (ESI) Calcd. for  $\text{C}_{24}\text{H}_{31}\text{N}_2\text{O}_4\text{S}^+(\text{M}+\text{NH}_4)^+$  requires: 443.1999, found: 443.1993.

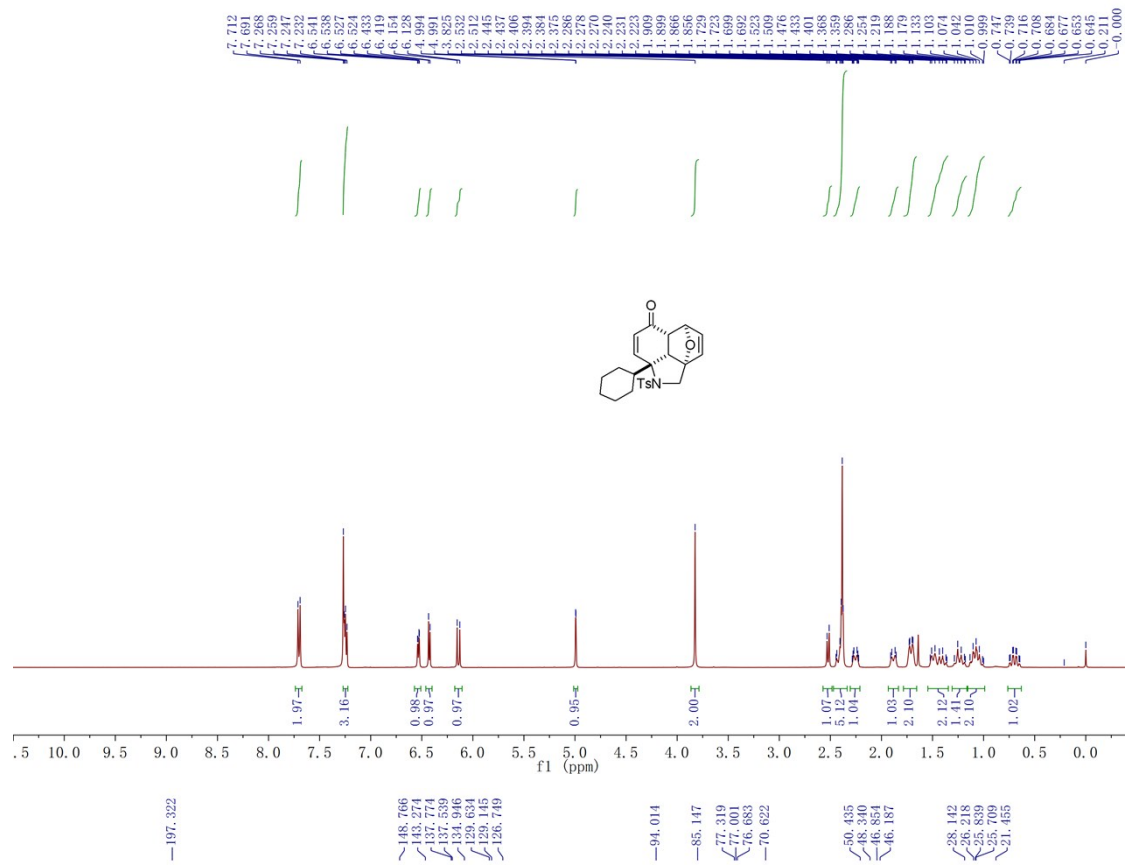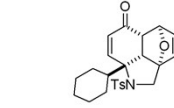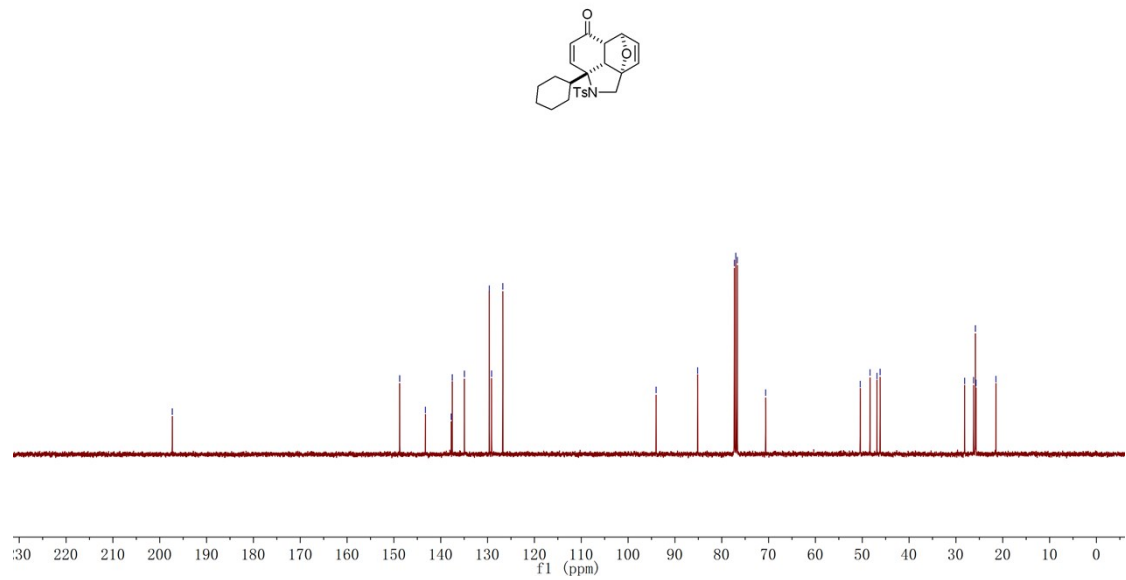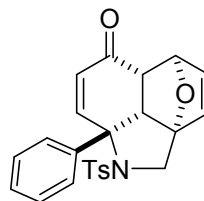

### Compound 3i:

0.30 mmol scale, a white solid, 65% yield (81.6 mg). M.p.: 187-189 °C. <sup>1</sup>H NMR (CDCl<sub>3</sub>, TMS, 400 MHz) δ 2.40 (s, 3H), 2.44 (d, *J* = 8.0 Hz, 1H), 2.80 (d, *J* = 8.0 Hz, 1H), 4.12 (d, *J* = 12.0 Hz, 1H), 4.22 (d, *J* = 12.0 Hz, 1H), 5.03 (d, *J* = 1.2 Hz, 1H), 6.38 (d, *J* = 10.4 Hz, 1H), 6.43 (d, *J* = 5.6 Hz, 1H), 6.49 (dd, *J* = 1.2 Hz, 5.6 Hz, 1H), 7.24 (d, *J* = 8.4 Hz, 2H), 7.27-7.30 (m, 1H), 7.32-7.37 (m, 4H), 7.58-7.63 (m, 3H). <sup>13</sup>C NMR (CDCl<sub>3</sub>, TMS, 100 MHz) δ 21.5, 47.5, 50.5, 57.8, 68.6, 85.2, 94.5, 125.1, 127.0, 127.6, 128.9, 129.3, 129.5, 134.9, 137.1, 137.5, 143.4, 145.3, 147.1, 197.0. IR (neat) ν 3058, 3029, 2958, 2919, 2872, 2843, 1668, 1597, 1492, 1447, 1388, 1334, 1292, 1263, 1185, 1155, 1137, 1097, 1065, 996, 963, 942, 922, 886, 842, 813, 781, 733, 721, 697, 672 cm<sup>-1</sup>. HRMS (ESI) Calcd. for C<sub>24</sub>H<sub>25</sub>N<sub>2</sub>O<sub>4</sub>S<sup>+</sup>(M+NH<sub>4</sub>)<sup>+</sup> requires: 437.1530, found: 437.1529.

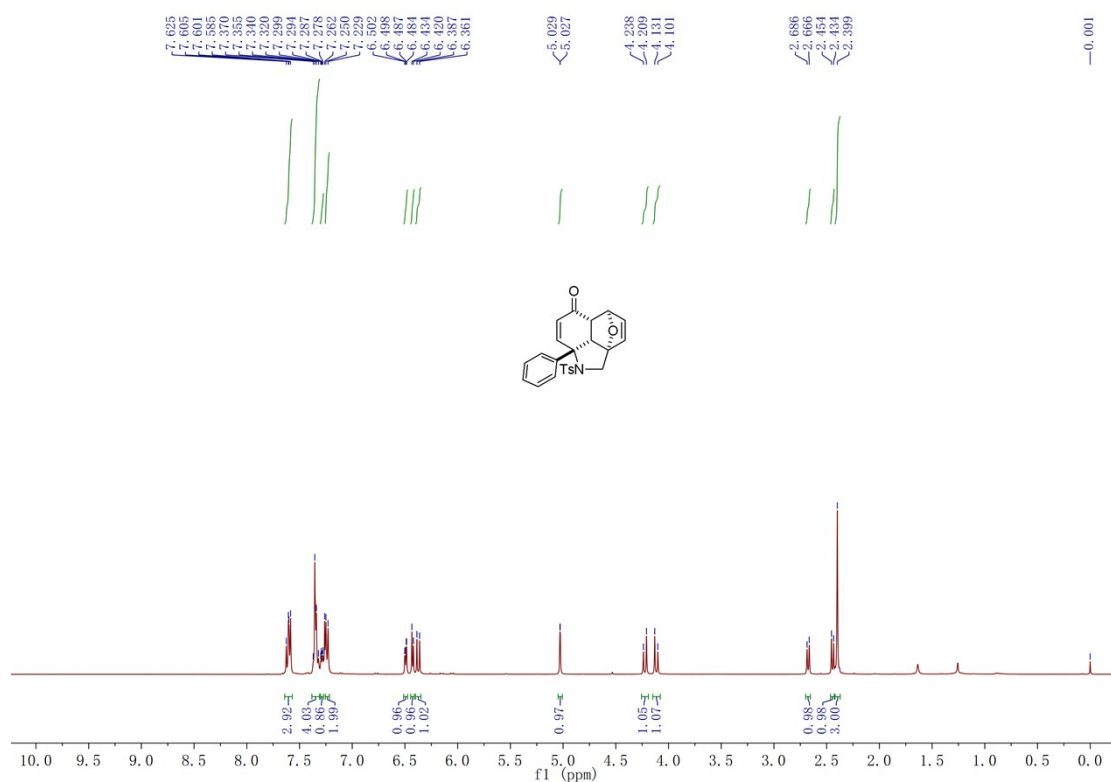

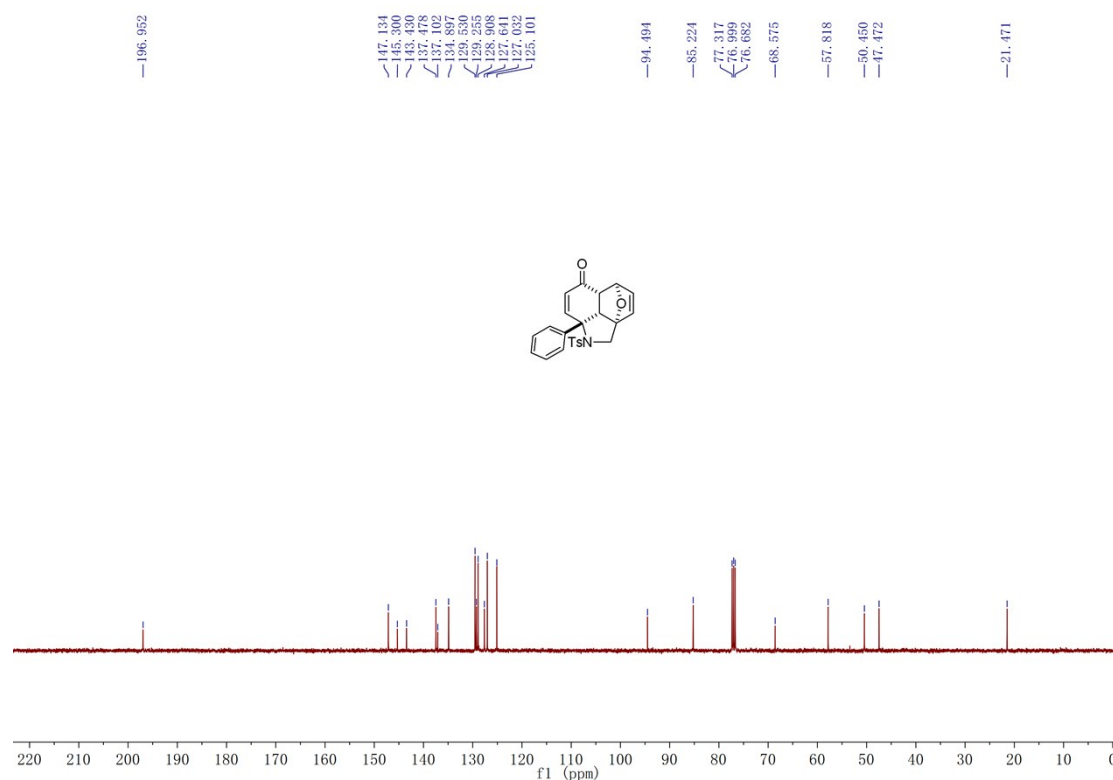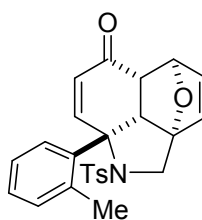

### Compound 3j:

0.30 mmol scale, a light yellow solid, 65% yield (84.3 mg). M.p.: 72-75 °C. <sup>1</sup>H NMR (CDCl<sub>3</sub>, TMS, 400 MHz) δ 2.15 (s, 3H), 2.31-2.55 (m, 4H), 2.75 (br, 1H), 4.10-4.20 (m, 2H), 5.04 (br, 1H), 6.17-6.34 (m, 1H), 6.46 (d, *J* = 4.0 Hz, 2H), 7.12 (d, *J* = 6.8 Hz, 1H), 7.19-7.26 (m, 4H), 7.57-8.09 (m, 4H). <sup>13</sup>C NMR (CDCl<sub>3</sub>, TMS, 100 MHz) δ 21.5, 47.9 (br), 50.2, 56.5 (br), 68.3, 84.6 (br), 94.7, 126.4 (br), 127.0, 128.2, 129.3, 133.2, 134.4 (br), 135.4 (br), 137.0, 137.4, 141.4 (br), 142.2, 143.4, 145.9 (br), 148.9 (br), 196.6 (br). IR (neat) ν 3055, 3013, 2963, 2923, 2872, 1668, 1597, 1476, 1387, 1336, 1290, 1262, 1155, 1135, 1094, 1065, 990, 964, 940, 920, 871, 841, 813, 780, 758, 733, 718, 703, 671 cm<sup>-1</sup>. HRMS (ESI) Calcd. for C<sub>25</sub>H<sub>27</sub>N<sub>2</sub>O<sub>4</sub>S<sup>+1</sup>(M+NH<sub>4</sub>)<sup>+</sup> requires: 451.1686, found: 451.1689.



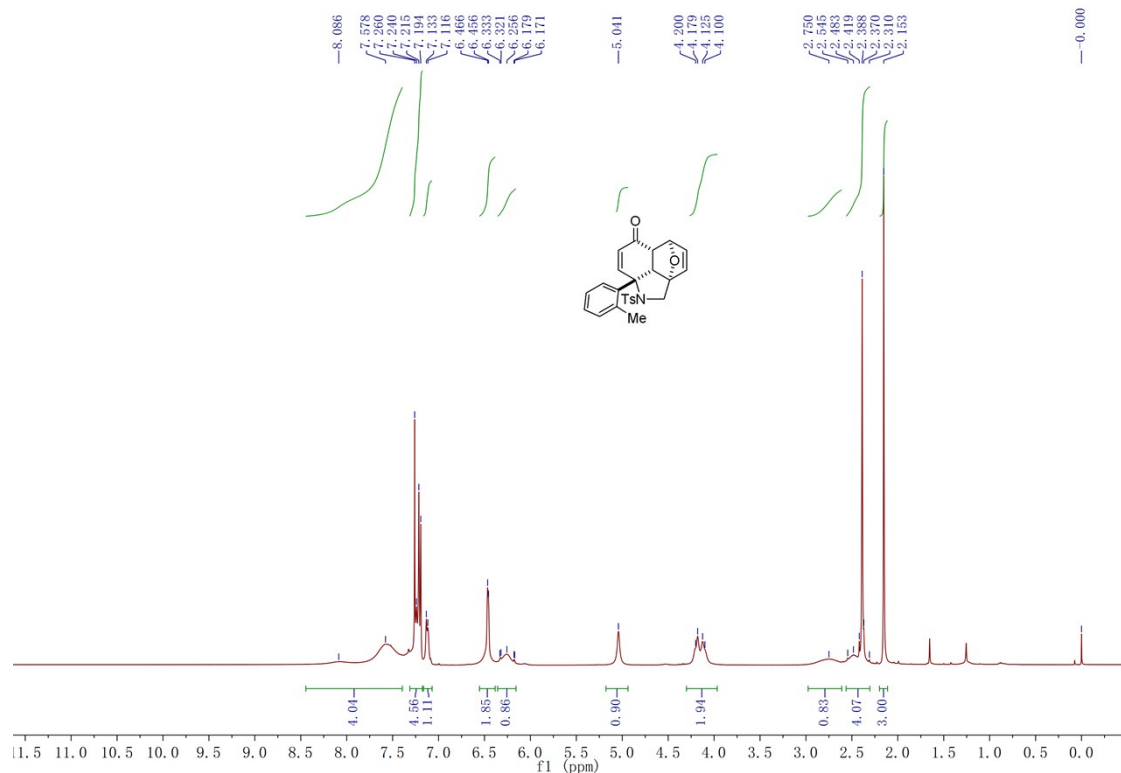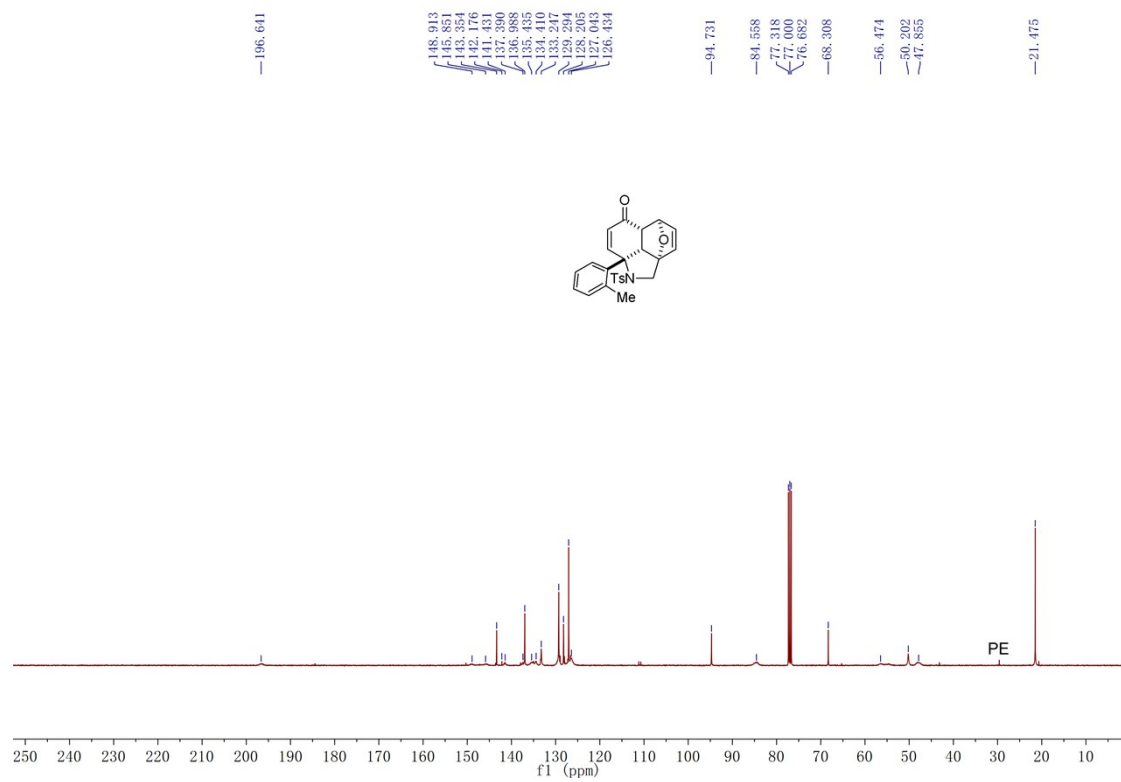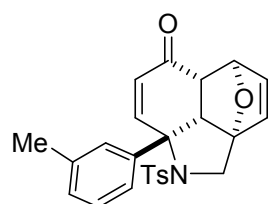

### Compound 3k:

0.30 mmol scale, a white solid, 65% yield (84.4 mg). M.p.: 171-173 °C. <sup>1</sup>H NMR (CDCl<sub>3</sub>, TMS, 400 MHz) δ 2.28 (s, 3H), 2.39 (s, 3H), 2.42 (d, *J* = 8.0 Hz, 1H), 2.67 (d, *J* = 8.0 Hz, 1H), 4.15 (d, *J* = 11.6 Hz, 1H), 4.21 (d, *J* = 11.6 Hz, 1H), 5.01 (d, *J* = 1.2 Hz, 1H), 6.37 (d, *J* = 10.8 Hz, 1H), 6.43 (d, *J* = 6.0 Hz, 1H), 6.48 (dd, *J* = 1.2 Hz, 6.0 Hz, 1H), 7.02 (s, 1H), 7.07 (d, *J* = 7.2 Hz, 1H), 7.15 (d, *J* = 8.0 Hz, 1H), 7.19-7.23 (m, 3H), 7.54 (d, *J* = 8.4 Hz, 2H), 7.63 (d, *J* = 10.4 Hz, 1H). <sup>13</sup>C NMR (CDCl<sub>3</sub>, TMS, 100 MHz) δ 21.4, 21.5, 47.4, 50.4, 57.8, 68.4, 85.2, 94.4, 122.3, 125.8, 127.0, 128.4, 128.7, 129.1, 129.4, 134.9, 137.1, 137.4, 138.4, 143.3, 144.9, 147.5, 197.0. IR (neat) ν 3052, 2979, 2955, 2923, 2874, 2858, 1668, 1598, 1489, 1461, 1387, 1336, 1292, 1264, 1156, 1135, 1097, 1066, 994, 961, 923, 894, 867, 837, 814, 787, 733, 718, 697, 672 cm<sup>-1</sup>. HRMS (ESI) Calcd. for C<sub>25</sub>H<sub>27</sub>N<sub>2</sub>O<sub>4</sub>S<sup>+</sup>(M+NH<sub>4</sub>)<sup>+</sup> requires: 451.1686, found: 451.1687.

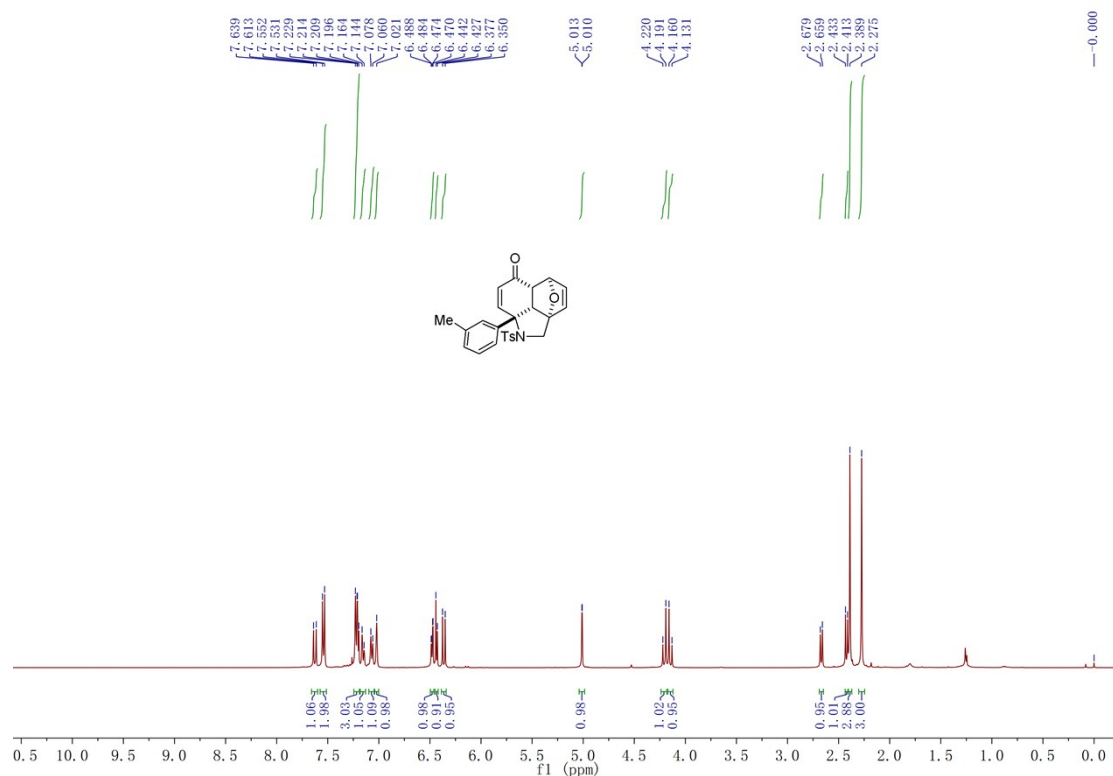

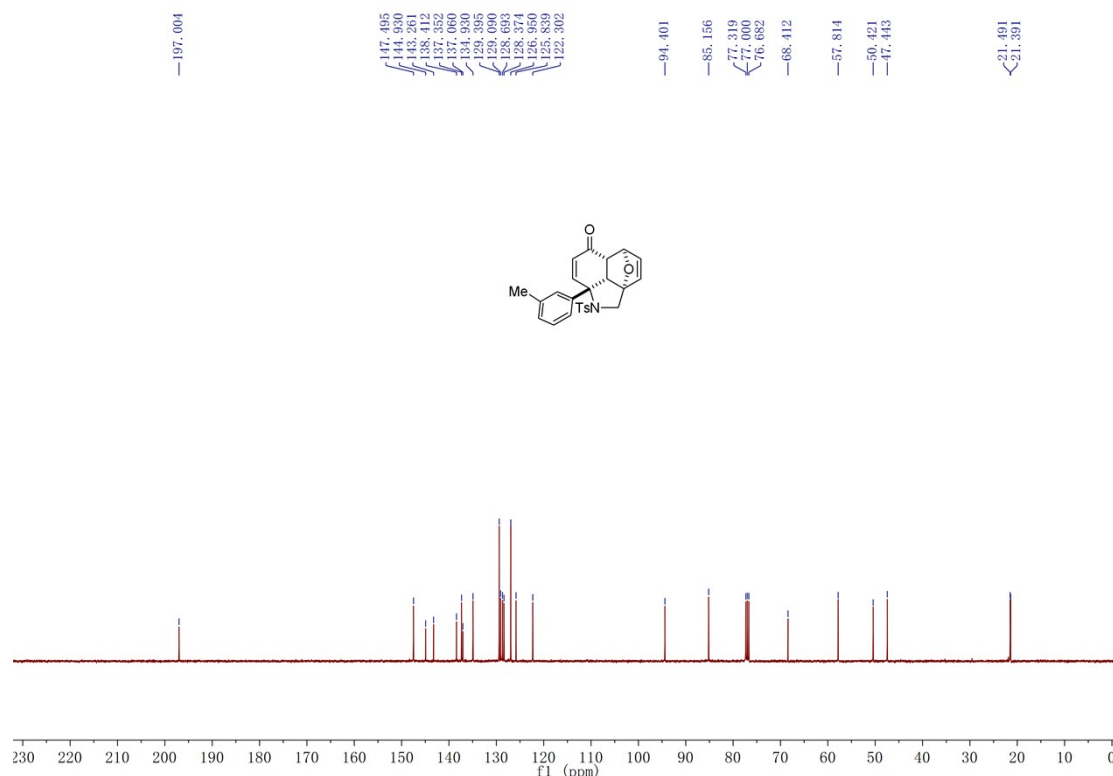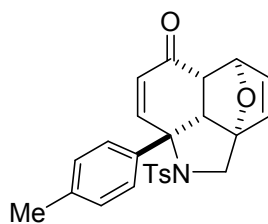

**Compound 3l:**

0.30 mmol scale, a light yellow solid, 86% yield (112.2 mg). M.p.: 165-166 °C. <sup>1</sup>H NMR (CDCl<sub>3</sub>, TMS, 400 MHz) δ 2.34 (s, 3H), 2.40 (s, 3H), 2.43 (d, *J* = 8.0 Hz, 1H), 2.67 (d, *J* = 8.0 Hz, 1H), 4.10 (d, *J* = 12.0 Hz, 1H), 4.22 (d, *J* = 12.0 Hz, 1H), 5.02 (d, *J* = 1.6 Hz, 1H), 6.36 (d, *J* = 10.4 Hz, 1H), 6.42 (d, *J* = 6.0 Hz, 1H), 6.49 (dd, *J* = 1.6 Hz, 6.0 Hz, 1H), 7.14 (d, *J* = 8.0 Hz, 2H), 7.22-7.27 (m, 4H), 7.60 (d, *J* = 8.4 Hz, 3H). <sup>13</sup>C NMR (CDCl<sub>3</sub>, TMS, 100 MHz) δ 21.0, 21.5, 47.5, 50.5, 57.9, 68.4, 85.2, 94.5, 125.0, 127.1, 129.1, 129.5, 129.6, 134.9, 137.2, 137.5, 142.5, 143.4, 147.4, 197.0. IR (neat) ν 3055, 3026, 2953, 2921, 2869, 1667, 1597, 1510, 1494, 1456, 1387, 1334, 1292, 1263, 1184, 1155, 1137, 1113, 1097, 1066, 996, 962, 942, 922, 901, 886, 866, 845, 812, 733, 718, 702, 670 cm<sup>-1</sup>. HRMS (ESI) Calcd. for C<sub>25</sub>H<sub>27</sub>N<sub>2</sub>O<sub>4</sub>S<sup>+1</sup>(M+NH<sub>4</sub>)<sup>+</sup> requires: 451.1686, found: 451.1684.

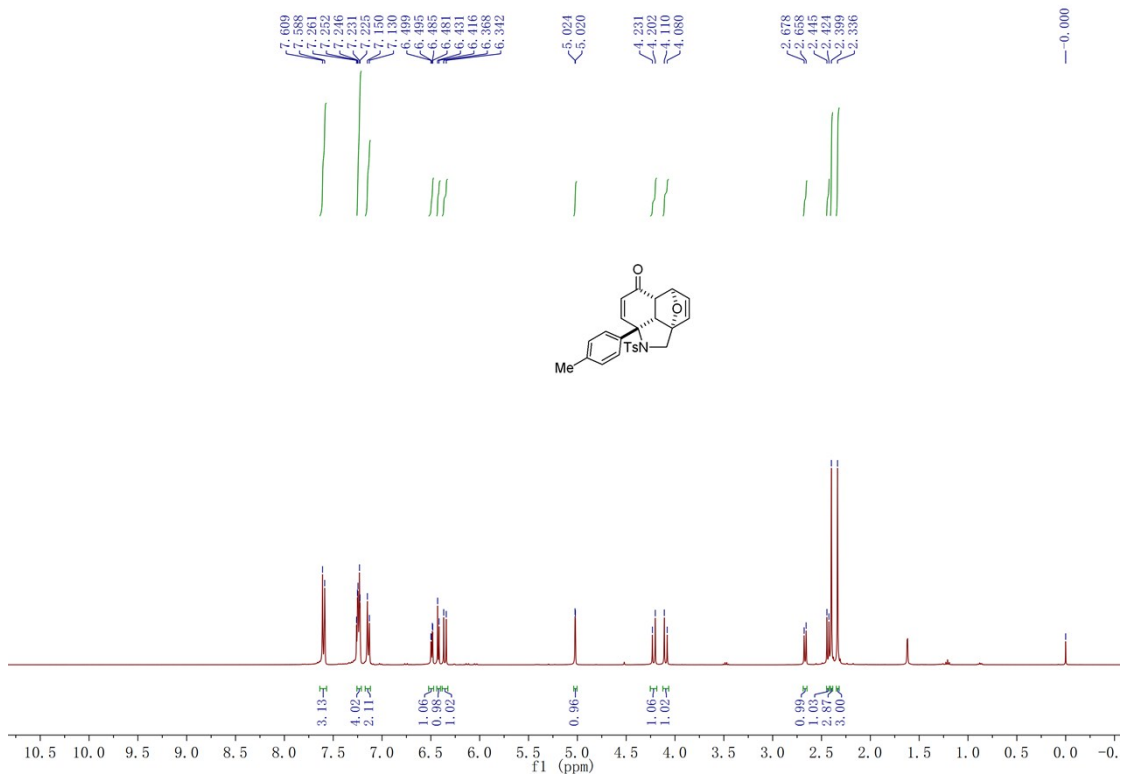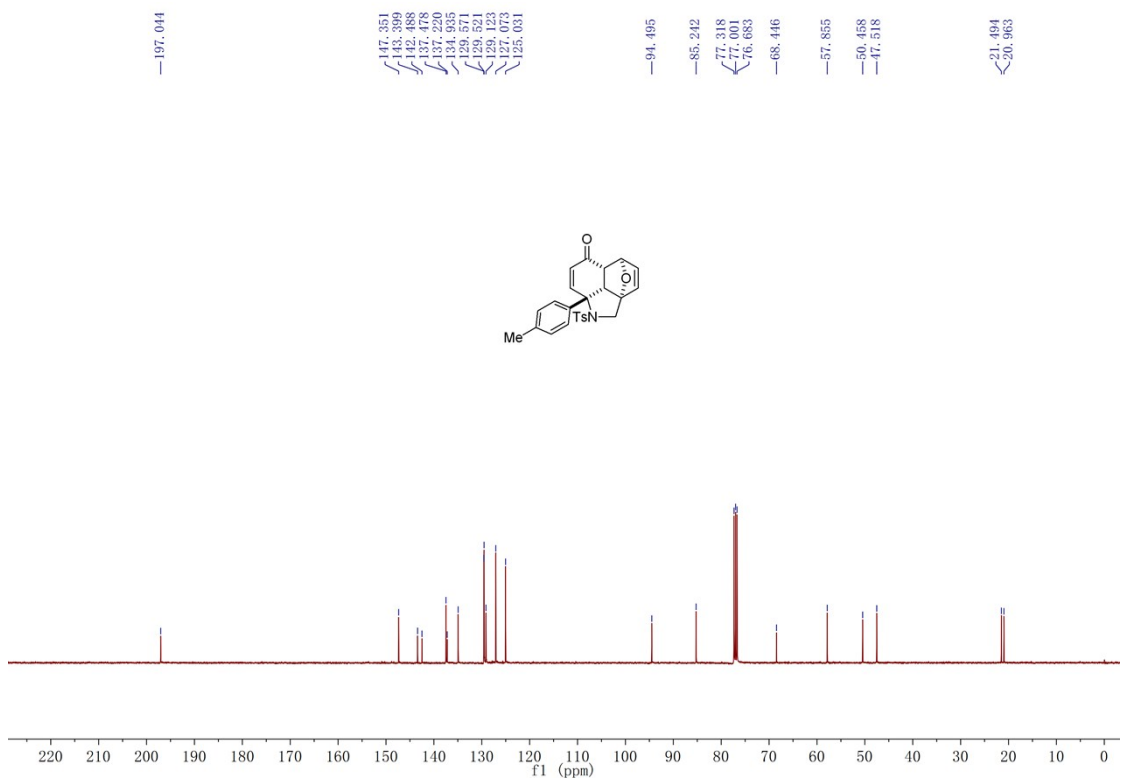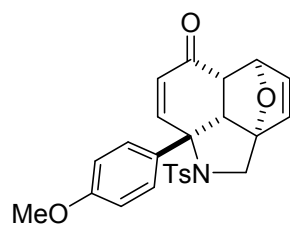

### Compound 3m:

0.30 mmol scale, a white solid, 75% yield (100.4 mg). M.p.: 170-172 °C.  $^1\text{H}$  NMR ( $\text{CDCl}_3$ , TMS, 400 MHz)  $\delta$  2.40 (s, 3H), 2.44 (d,  $J = 8.0$  Hz, 1H), 2.67 (d,  $J = 8.0$  Hz, 1H), 3.80 (s, 3H), 4.11 (d,  $J = 11.6$  Hz, 1H), 4.20 (d,  $J = 11.6$  Hz, 1H), 5.02 (d,  $J = 1.6$  Hz, 1H), 6.35 (d,  $J = 10.4$  Hz, 1H), 6.43 (d,  $J = 5.6$  Hz, 1H), 6.50 (dd,  $J = 1.6$  Hz, 5.6 Hz, 1H), 6.84 (d,  $J = 8.8$  Hz, 2H), 7.22-7.27 (m, 4H), 7.57-7.63 (m, 3H).  $^{13}\text{C}$  NMR ( $\text{CDCl}_3$ , TMS, 100 MHz)  $\delta$  21.5, 47.5, 50.4, 55.3, 57.8, 68.2, 85.2, 94.4, 114.1, 126.5, 127.1, 129.0, 129.5, 134.9, 137.1, 137.3, 137.5, 143.4, 147.5, 158.9, 197.1. IR (neat)  $\nu$  3057, 3008, 2961, 2932, 2877, 2835, 1667, 1607, 1509, 1462, 1388, 1335, 1251, 1179, 1155, 1136, 1113, 1096, 1066, 1034, 994, 963, 942, 922, 900, 866, 845, 813, 731, 718, 703, 671  $\text{cm}^{-1}$ . HRMS (ESI) Calcd. for  $\text{C}_{25}\text{H}_{24}\text{NO}_5\text{S}^+ (\text{M}+\text{H})^+$  requires: 450.1370, found: 450.1371.

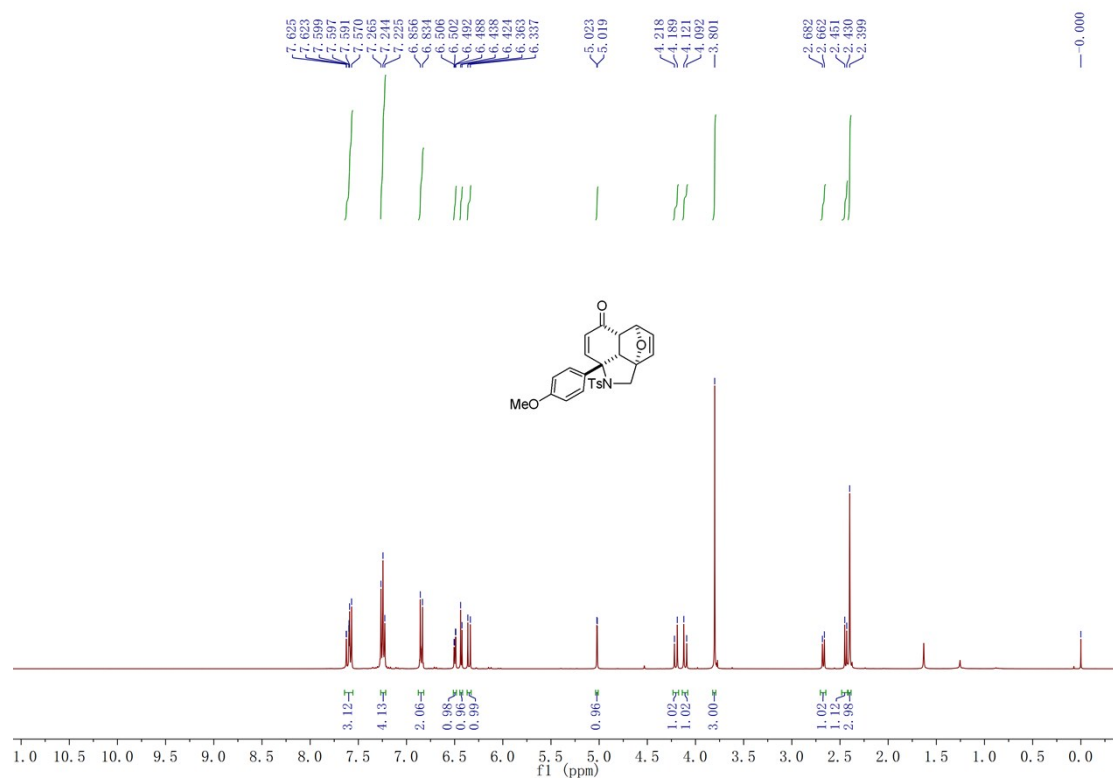

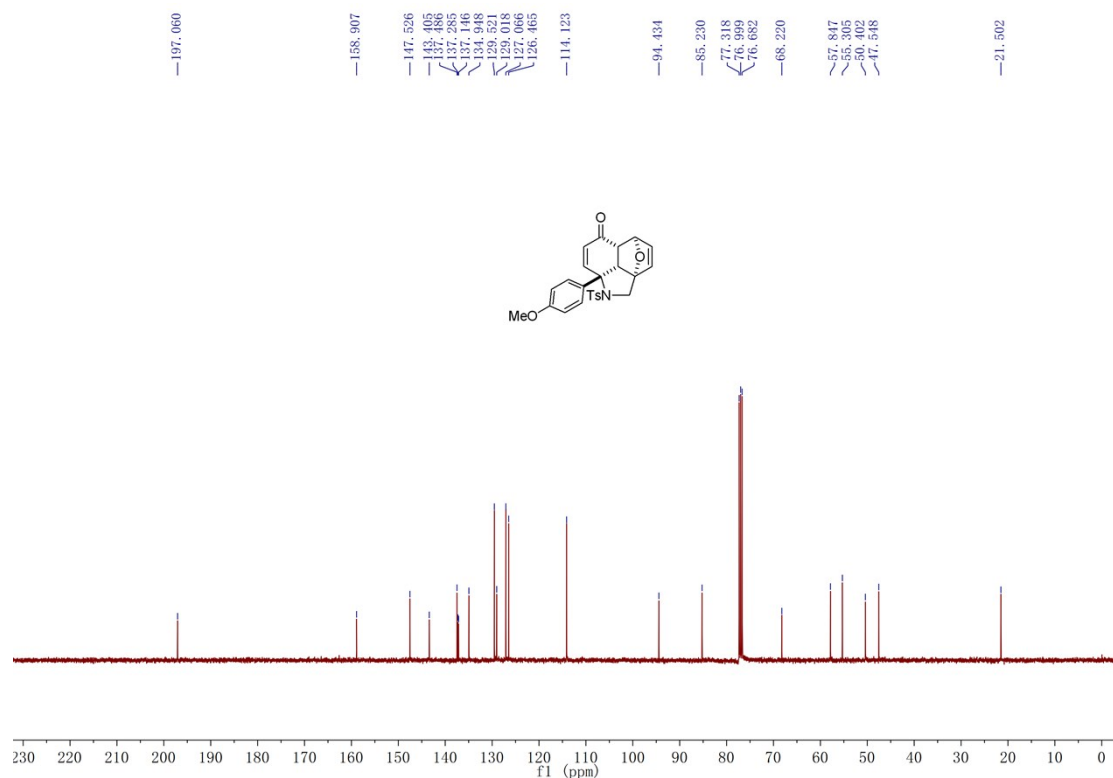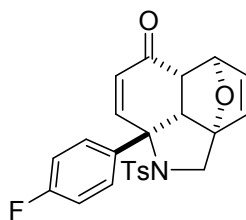

### Compound 3n:

0.30 mmol scale, a white solid, 66% yield (86.0 mg). M.p.: 91-93 °C.  $^1\text{H}$  NMR ( $\text{CDCl}_3$ , TMS, 400 MHz)  $\delta$  2.40 (s, 3H), 2.44 (d,  $J = 8.0$  Hz, 1H), 2.64 (d,  $J = 8.0$  Hz, 1H), 4.10 (d,  $J = 12.0$  Hz, 1H), 4.22 (d,  $J = 12.0$  Hz, 1H), 5.01 (d,  $J = 1.2$  Hz, 1H), 6.37 (d,  $J = 10.4$  Hz, 1H), 6.43 (d,  $J = 5.6$  Hz, 1H), 6.50 (dd,  $J = 1.2$  Hz, 5.6 Hz, 1H), 7.00 (dd,  $J = 8.4$  Hz, 8.4 Hz, 2H), 7.25 (d,  $J = 8.0$  Hz, 2H), 7.30-7.35 (m, 2H), 7.56-7.60 (m, 3H).  $^{13}\text{C}$  NMR ( $\text{CDCl}_3$ , TMS, 100 MHz)  $\delta$  21.4, 47.4, 50.3, 57.8, 68.1, 85.2, 94.4, 115.7 (d,  $J = 21.6$  Hz), 126.9, 127.0 (d,  $J = 8.1$  Hz), 129.3, 129.5, 134.9, 136.9, 137.5, 141.1 (d,  $J = 3.3$  Hz), 143.6, 146.8, 161.9 (d,  $J = 245.8$  Hz), 196.7.  $^{19}\text{F}$  NMR ( $\text{CDCl}_3$ ,  $\text{CFCl}_3$ , 376 MHz)  $\delta$  -114.67- -114.60 (m). IR (neat)  $\nu$  3063, 3005, 2981, 2953, 2925, 2874, 2845, 1669, 1599, 1506, 1462, 1386, 1335, 1264, 1229, 1186, 1155, 1136, 1096, 1066, 996, 963, 943, 922, 901, 867, 847, 814, 733, 718, 702, 671  $\text{cm}^{-1}$ . HRMS (ESI) Calcd. for  $\text{C}_{24}\text{H}_{24}\text{N}_2\text{O}_4\text{SF}^+(\text{M}+\text{NH}_4)^+$  requires: 455.1435, found: 455.1435.

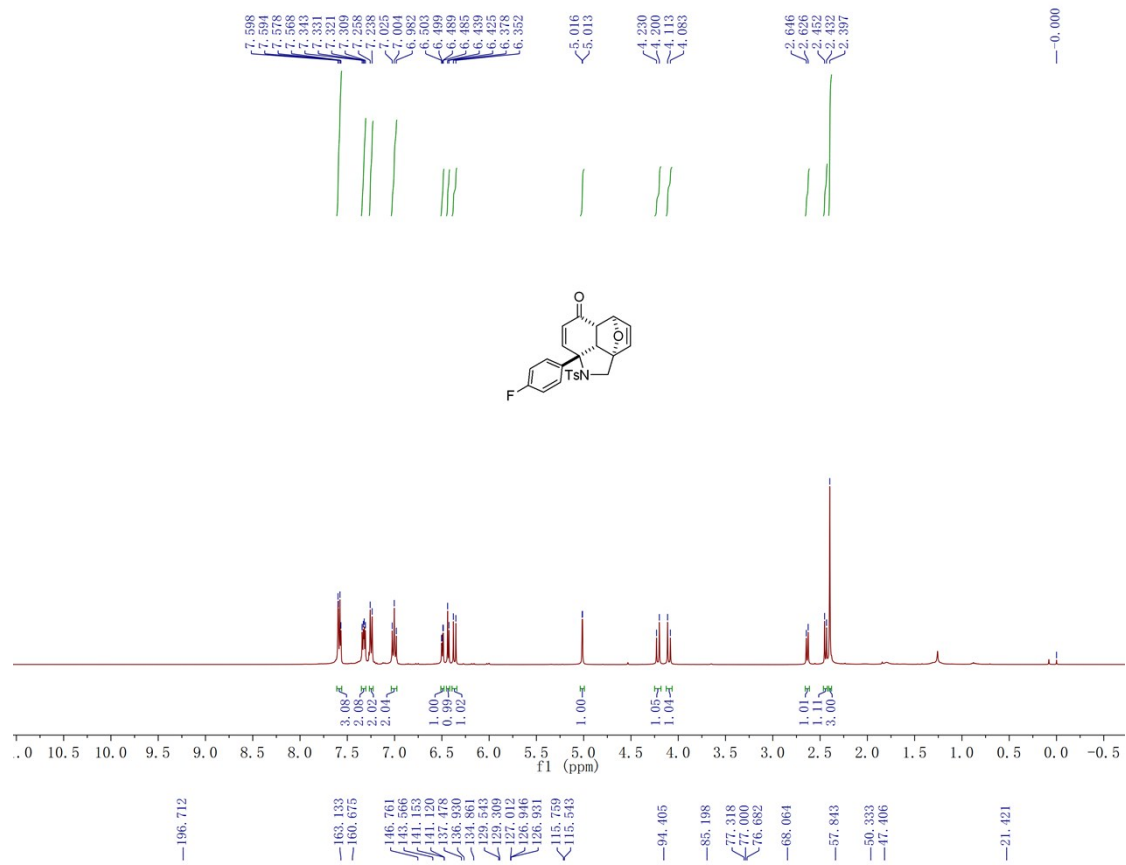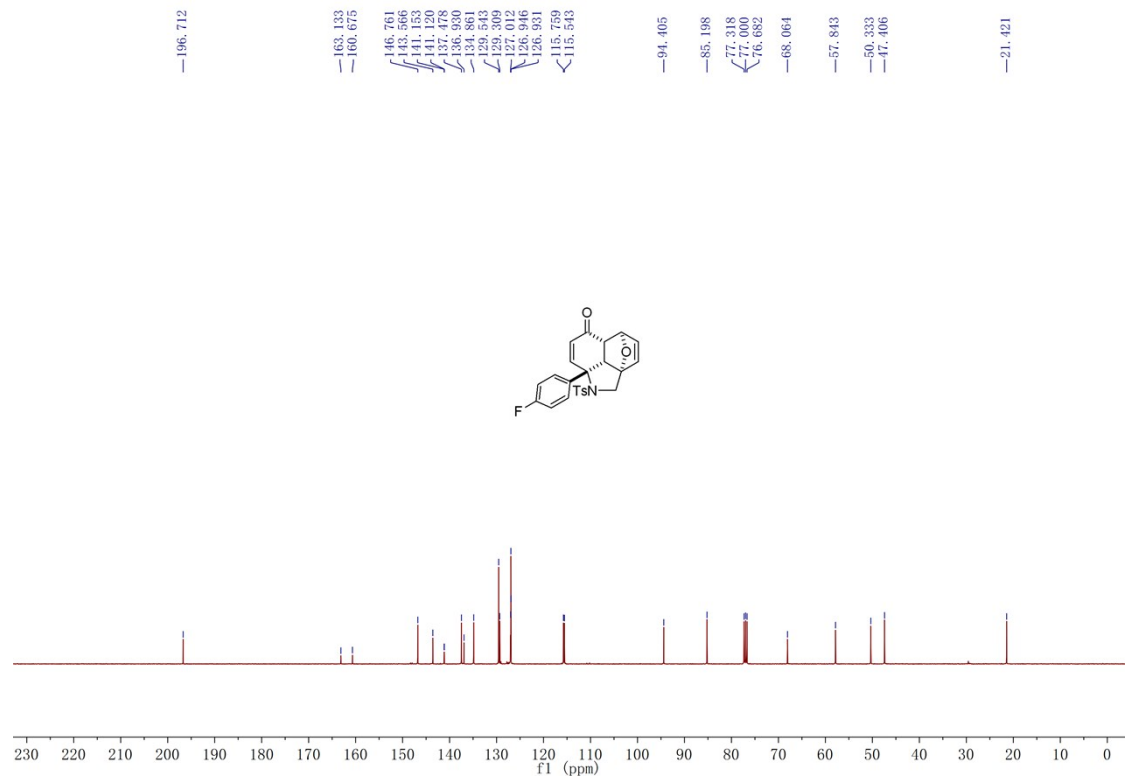

-114.598  
-114.611  
-114.620  
-114.625  
-114.633  
-114.647  
-114.656  
-114.669

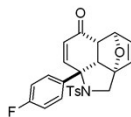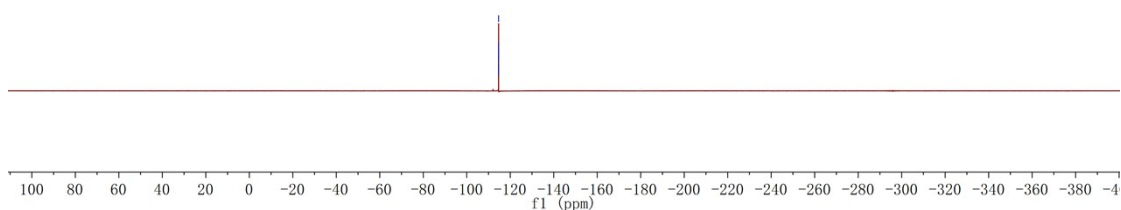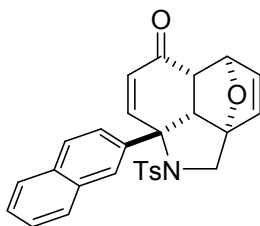

### Compound 3o:

0.30 mmol scale, a white solid, 62% yield (87.5 mg). M.p.: 107-109 °C.  $^1\text{H}$  NMR ( $\text{CDCl}_3$ , TMS, 400 MHz)  $\delta$  2.38 (s, 3H), 2.43 (d,  $J = 8.0$  Hz, 1H), 2.74 (dd,  $J = 0.8$  Hz, 8.0 Hz, 1H), 4.29 (d,  $J = 12.0$  Hz, 1H), 4.30 (d,  $J = 12.0$  Hz, 1H), 5.04 (d,  $J = 1.2$  Hz, 1H), 6.43-6.49 (m, 3H), 7.17 (d,  $J = 8.4$  Hz, 2H), 7.43 (dd,  $J = 6.0$  Hz, 8.8 Hz, 1H), 7.45-7.51 (m, 2H), 7.56 (d,  $J = 8.4$  Hz, 2H), 7.70-7.73 (m, 2H), 7.75-7.81 (m, 3H).  $^{13}\text{C}$  NMR ( $\text{CDCl}_3$ , TMS, 100 MHz)  $\delta$  21.5, 47.5, 50.6, 57.7, 68.6, 85.3, 94.5, 123.0, 124.1, 126.4, 126.6, 127.0, 127.5, 128.3, 129.1, 129.5, 132.5, 132.9, 135.0, 137.1, 137.5, 142.3, 143.4, 147.2, 197.0. IR (neat)  $\nu$  3055, 3010, 2981, 2958, 2924, 2874, 1668, 1597, 1506, 1461, 1389, 1334, 1292, 1264, 1155, 1136, 1121, 1096, 1066, 995, 962, 932, 922, 908, 869, 857, 838, 814, 732, 717, 705, 671  $\text{cm}^{-1}$ . HRMS (ESI) Calcd. for  $\text{C}_{28}\text{H}_{27}\text{N}_2\text{O}_4\text{S}^{+1}(\text{M}+\text{NH}_4)^+$  requires: 487.1686, found: 487.1679.



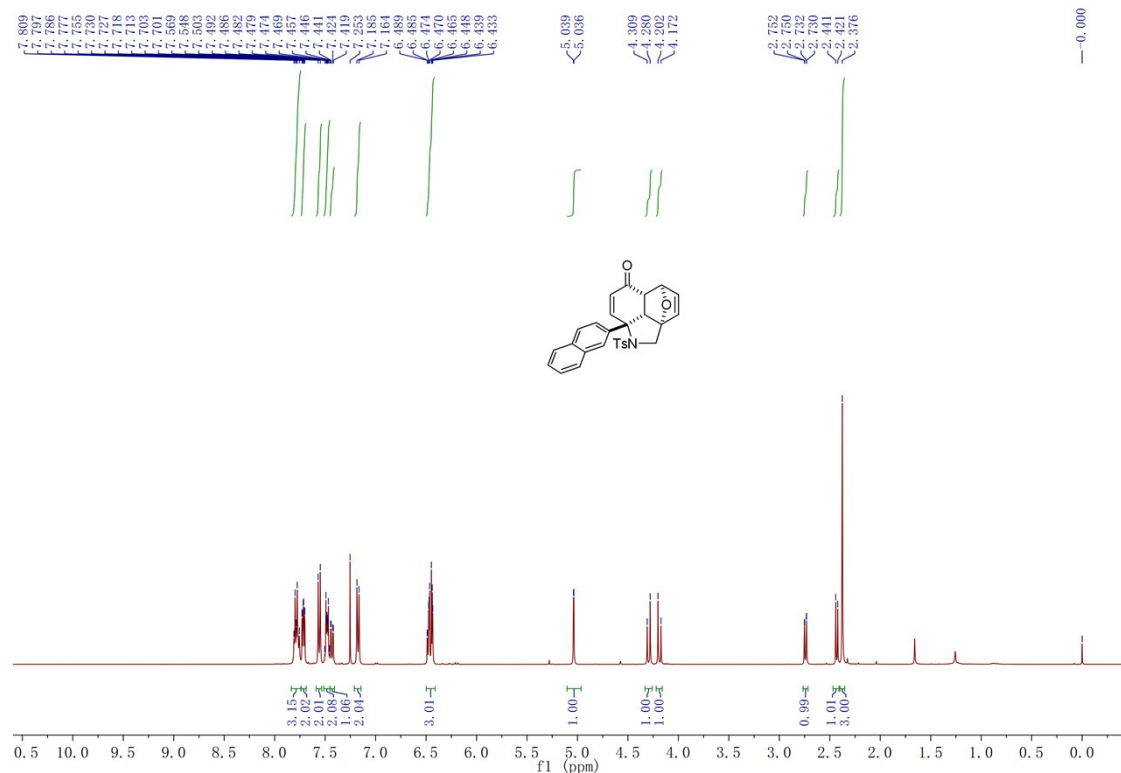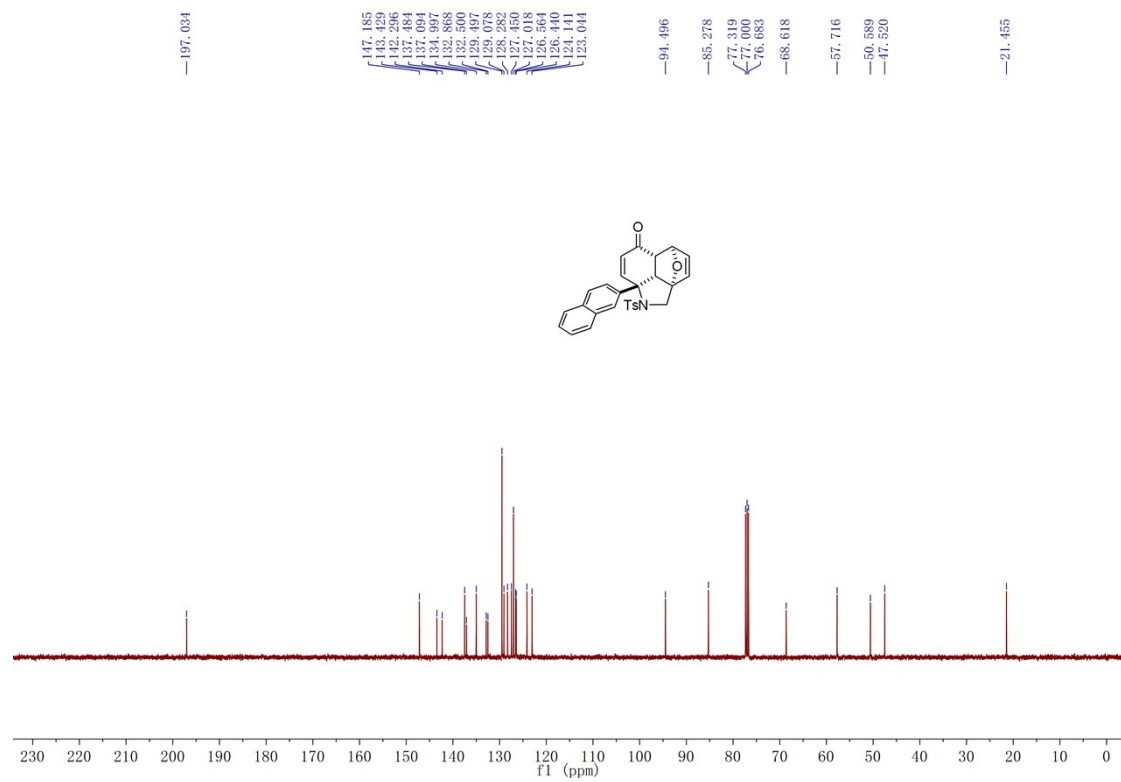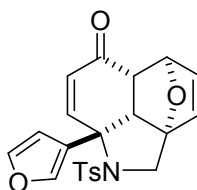

Compound 3p:

0.30 mmol scale, a white solid, 50% yield (61.6 mg). M.p.: 74-76 °C. <sup>1</sup>H NMR (CDCl<sub>3</sub>, TMS, 400 MHz) δ 2.40 (s, 3H), 2.47 (d, *J* = 8.0 Hz, 1H), 2.71 (dd, *J* = 0.4 Hz, 8.0 Hz, 1H), 4.06 (d, *J* = 11.6 Hz, 1H), 4.09 (d, *J* = 11.6 Hz, 1H), 5.01 (d, *J* = 1.6 Hz, 1H), 6.19 (dd, *J* = 0.8 Hz, 2.0 Hz, 1H), 6.23 (d, *J* = 10.4 Hz, 1H), 6.45 (d, *J* = 5.6 Hz, 1H), 6.53 (dd, *J* = 1.6 Hz, 5.6 Hz, 1H), 7.24 (d, *J* = 8.0 Hz, 2H), 7.28-7.30 (m, 1H), 7.32 (dd, *J* = 1.2 Hz, 2.0 Hz, 1H), 7.57 (d, *J* = 8.0 Hz, 2H), 7.64 (dd, *J* = 1.2 Hz, 10.4 Hz, 1H). <sup>13</sup>C NMR (CDCl<sub>3</sub>, TMS, 100 MHz) δ 21.5, 47.6, 49.8, 56.0, 62.3, 85.1, 94.0, 108.4, 127.1, 128.3, 129.5, 130.4, 134.9, 136.9, 137.7, 139.3, 143.5, 143.8, 147.1, 196.6. IR (neat) ν 3144, 3128, 3060, 2987, 2955, 2924, 2866, 1668, 1597, 1495, 1462, 1390, 1336, 1292, 1266, 1156, 1134, 1116, 1096, 1066, 1036, 993, 924, 905, 883, 872, 840, 814, 793, 732, 716, 705, 670 cm<sup>-1</sup>. HRMS (ESI) Calcd. for C<sub>22</sub>H<sub>23</sub>N<sub>2</sub>O<sub>5</sub>S<sup>+</sup>(M+NH<sub>4</sub>)<sup>+</sup> requires: 427.1322, found: 427.1320.

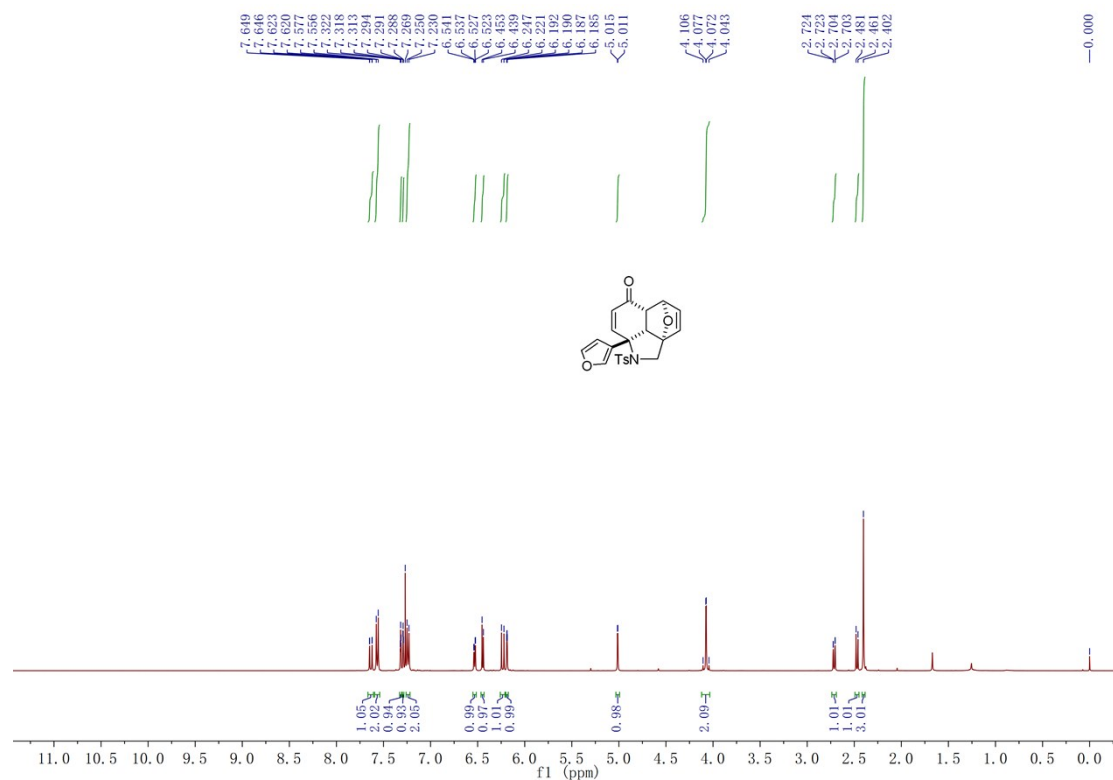

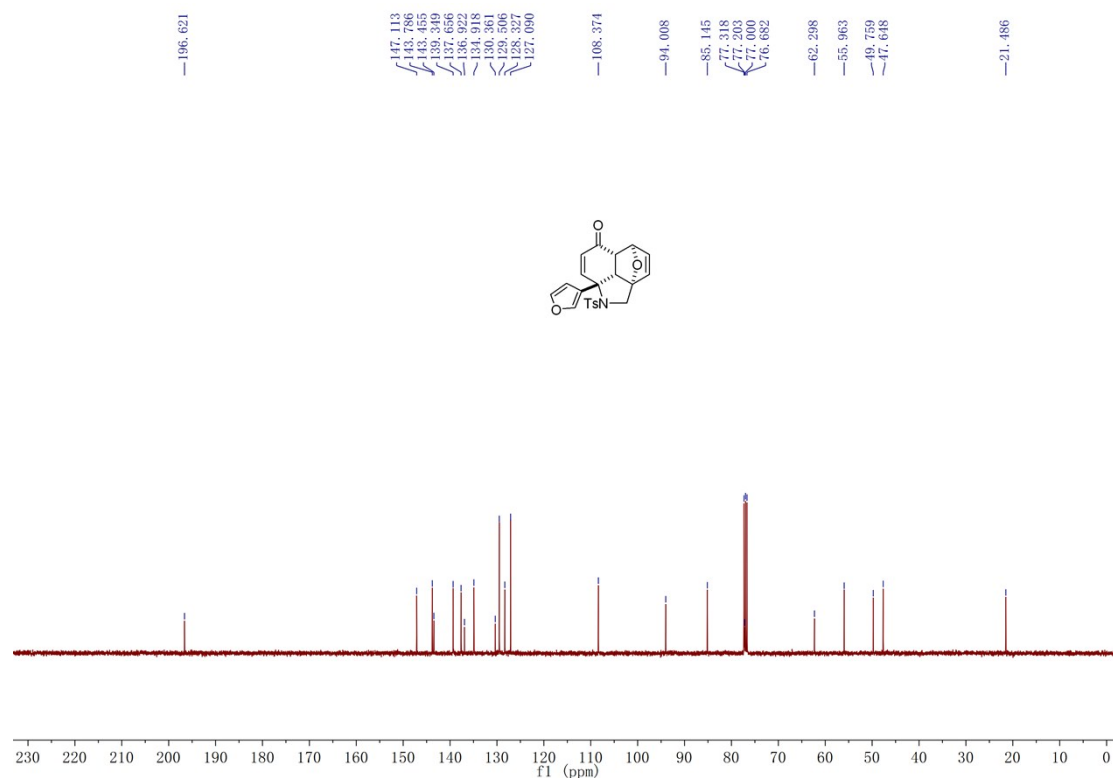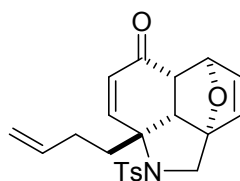

### Compound 3q:

0.30 mmol scale, a white solid, 72% yield (85.3 mg). M.p.: 92-94 °C. <sup>1</sup>H NMR (CDCl<sub>3</sub>, TMS, 400 MHz) δ 1.93-2.10 (m, 3H), 2.41 (s, 3H), 2.42-2.52 (m, 3H), 3.87 (d, *J* = 11.6 Hz, 1H), 3.91 (d, *J* = 11.6 Hz, 1H), 4.96-5.03 (m, 3H), 5.71-5.82 (m, 1H), 6.12 (d, *J* = 10.4 Hz, 2H), 6.41 (d, *J* = 6.0 Hz, 1H), 6.53 (dd, *J* = 1.2 Hz, 6.0 Hz, 1H), 7.28-7.31 (m, 3H), 7.73 (d, *J* = 8.0 Hz, 2H). <sup>13</sup>C NMR (CDCl<sub>3</sub>, TMS, 100 MHz) δ 21.4, 28.9, 40.7, 48.4, 49.5, 51.6, 66.8, 85.1, 93.9, 115.5, 127.0, 128.7, 129.7, 135.0, 136.5, 137.46, 137.52, 143.5, 148.7, 196.8. IR (neat) ν 3063, 3005, 2979, 2958, 2925, 2872, 2845, 1668, 1597, 1494, 1459, 1390, 1338, 1319, 1264, 1155, 1098, 1067, 988, 923, 888, 868, 844, 814, 779, 734, 706, 669 cm<sup>-1</sup>. HRMS (ESI) Calcd. for C<sub>22</sub>H<sub>27</sub>N<sub>2</sub>O<sub>4</sub>S<sup>+</sup>(M+NH<sub>4</sub>)<sup>+</sup> requires: 415.1686, found: 415.1685.

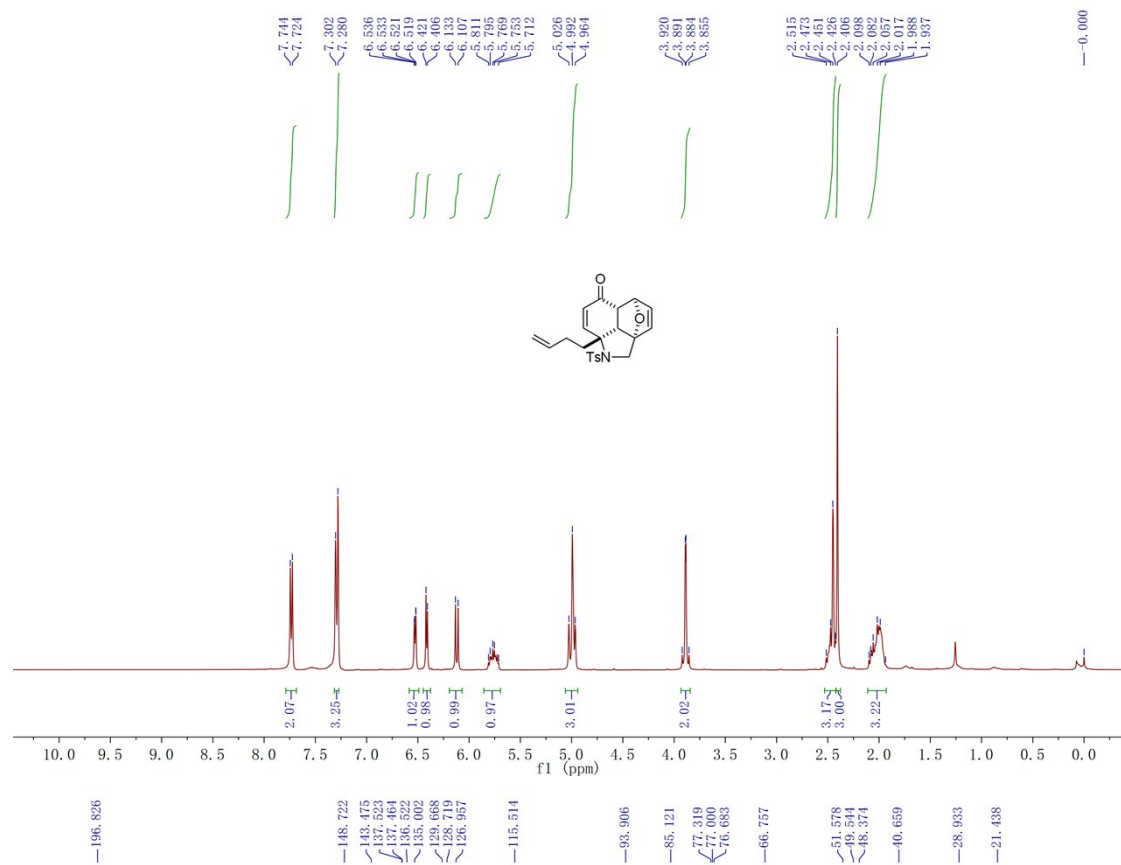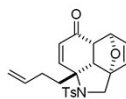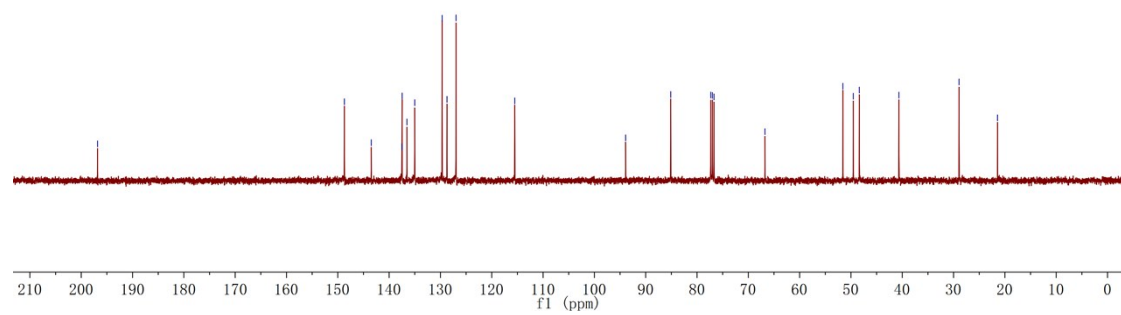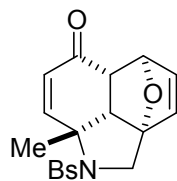

Compound 3r:

0.30 mmol scale, a white solid, 75% yield (95.2 mg). M.p.: 148-150 °C. <sup>1</sup>H NMR (CDCl<sub>3</sub>, TMS, 400 MHz) δ 1.78 (s, 3H), 2.41 (d, *J* = 8.0 Hz, 1H), 2.50 (d, *J* = 8.0 Hz, 1H), 3.92 (s, 2H), 5.01 (d, *J* = 1.6 Hz, 1H), 6.02 (d, *J* = 10.4 Hz, 1H), 6.42 (d, *J* = 5.6 Hz, 1H), 6.54 (dd, *J* = 1.6 Hz, 5.6 Hz, 1H), 7.33 (d, *J* = 10.4 Hz, 1H), 7.65 (d, *J* = 8.4 Hz, 2H), 7.73 (d, *J* = 8.4 Hz, 2H). <sup>13</sup>C NMR (CDCl<sub>3</sub>, TMS, 100 MHz) δ 30.7, 47.8, 49.4, 54.0, 63.5, 85.1, 93.7, 127.2, 127.7, 128.5, 132.4, 134.8, 137.5, 139.4, 150.2, 196.4. IR (neat) ν 3088, 3057, 2997, 2974, 2927, 2872, 2848, 1670, 1573, 1464, 1388, 1341, 1295, 1265, 1218, 1202, 1157, 1128, 1100, 1083, 1067, 1009, 995, 973, 924, 893, 880, 858, 820, 773, 737, 703, 665 cm<sup>-1</sup>. HRMS (ESI) Calcd. for C<sub>18</sub>H<sub>17</sub>NO<sub>4</sub>SBr<sup>+</sup>(M+H)<sup>+</sup> requires: 422.0056, found: 422.0053.

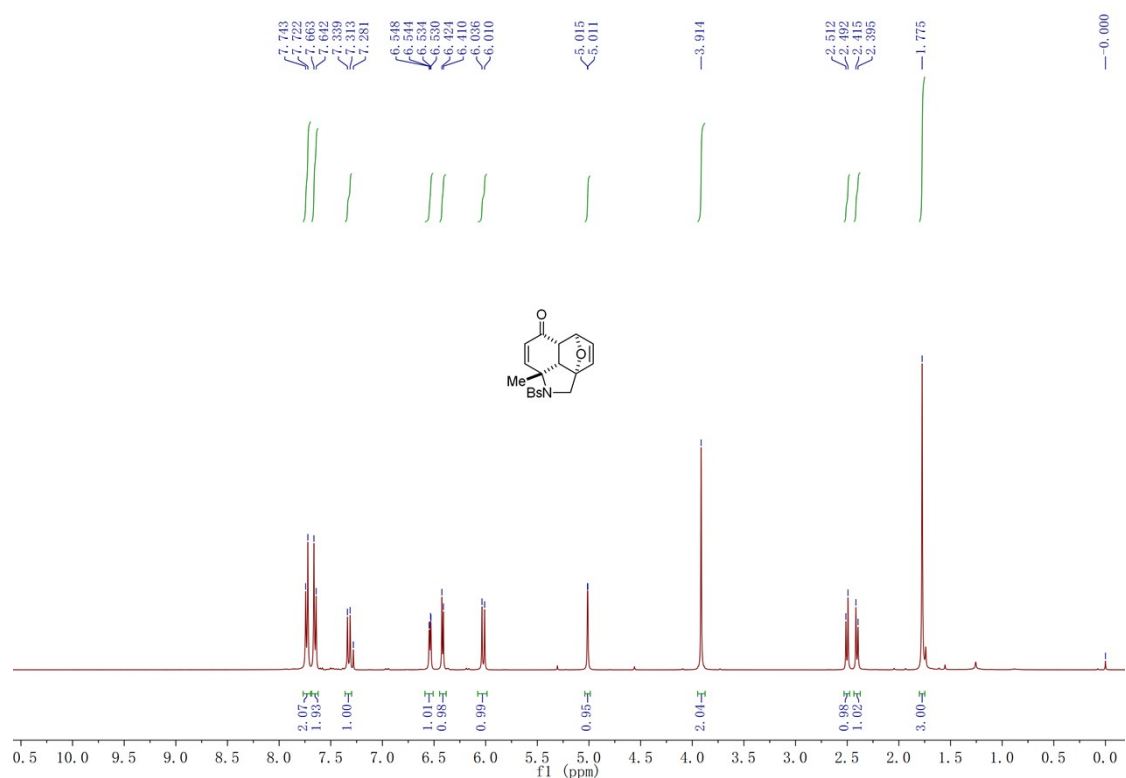

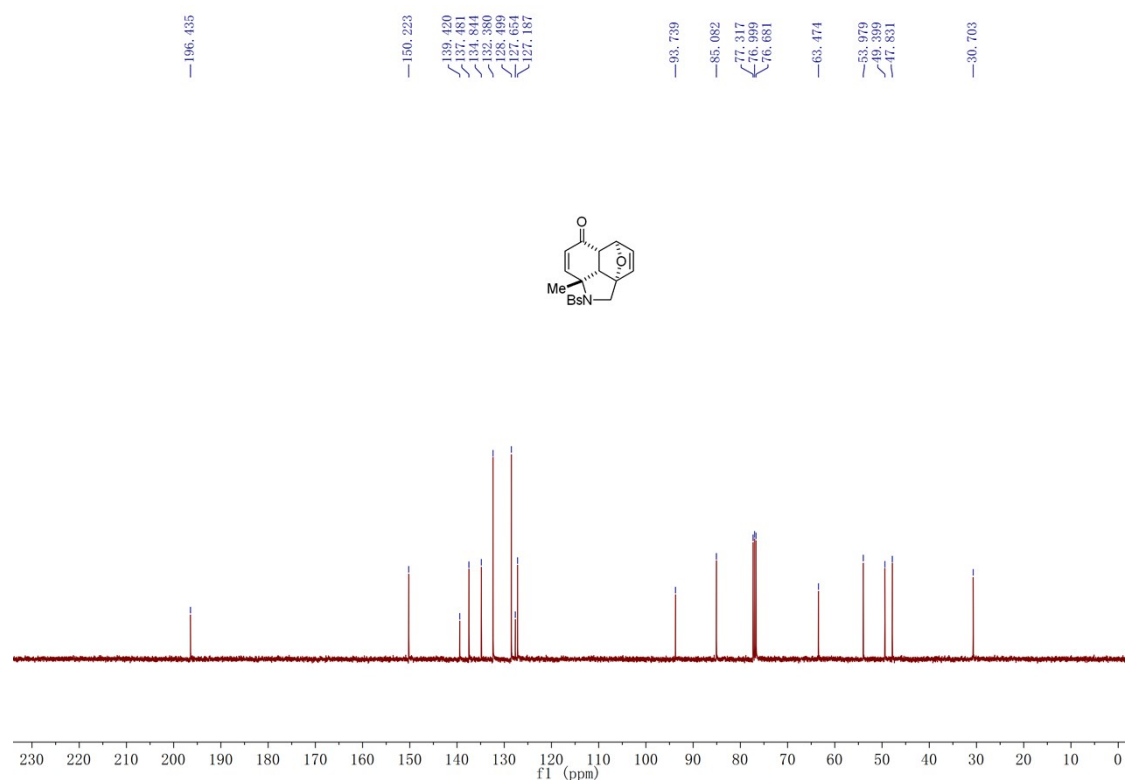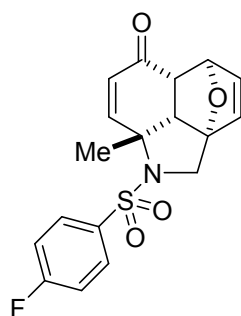

### Compound 3s:

0.30 mmol scale, a light yellow solid, 73% yield (79.1 mg). M.p.: 158-189 °C. <sup>1</sup>H NMR (CDCl<sub>3</sub>, TMS, 400 MHz) δ 1.79 (s, 3H), 2.41 (d, *J* = 8.0 Hz, 1H), 2.51 (d, *J* = 8.0 Hz, 1H), 3.89 (d, *J* = 11.6 Hz, 1H), 3.92 (d, *J* = 11.6 Hz, 1H), 5.01 (d, *J* = 1.2 Hz, 1H), 6.03 (d, *J* = 10.4 Hz, 1H), 6.42 (d, *J* = 5.6 Hz, 1H), 6.54 (dd, *J* = 1.2 Hz, 5.6 Hz, 1H), 7.17-7.22 (m, 2H), 7.35 (d, *J* = 10.4 Hz, 1H), 7.86-7.91 (m, 2H). <sup>13</sup>C NMR (CDCl<sub>3</sub>, TMS, 100 MHz) δ 30.7, 47.8, 49.4, 54.0, 63.4, 85.1, 93.8, 116.3 (d, *J* = 22.5 Hz), 127.2, 129.7 (d, *J* = 9.2 Hz), 134.9, 136.5 (d, *J* = 3.3 Hz), 137.5, 150.3, 164.9 (d, *J* = 253.5 Hz), 196.5. <sup>19</sup>F NMR (CDCl<sub>3</sub>, CFCl<sub>3</sub>, 376 MHz) δ -104.98- -104.90 (m). IR (neat) ν 3104, 3070, 3044, 3002, 2955, 2928, 2866, 1669, 1590, 1493, 1461, 1393, 1371, 1339, 1292, 1274, 1231, 1164, 1153, 1097, 1068, 980, 925, 877, 855, 838, 818, 775, 762, 735, 723, 711, 676 cm<sup>-1</sup>. HRMS (ESI) Calcd. for C<sub>18</sub>H<sub>20</sub>N<sub>2</sub>O<sub>4</sub>SF<sup>+1</sup>(M+NH<sub>4</sub>)<sup>+</sup> requires: 379.1122, found: 379.1123.

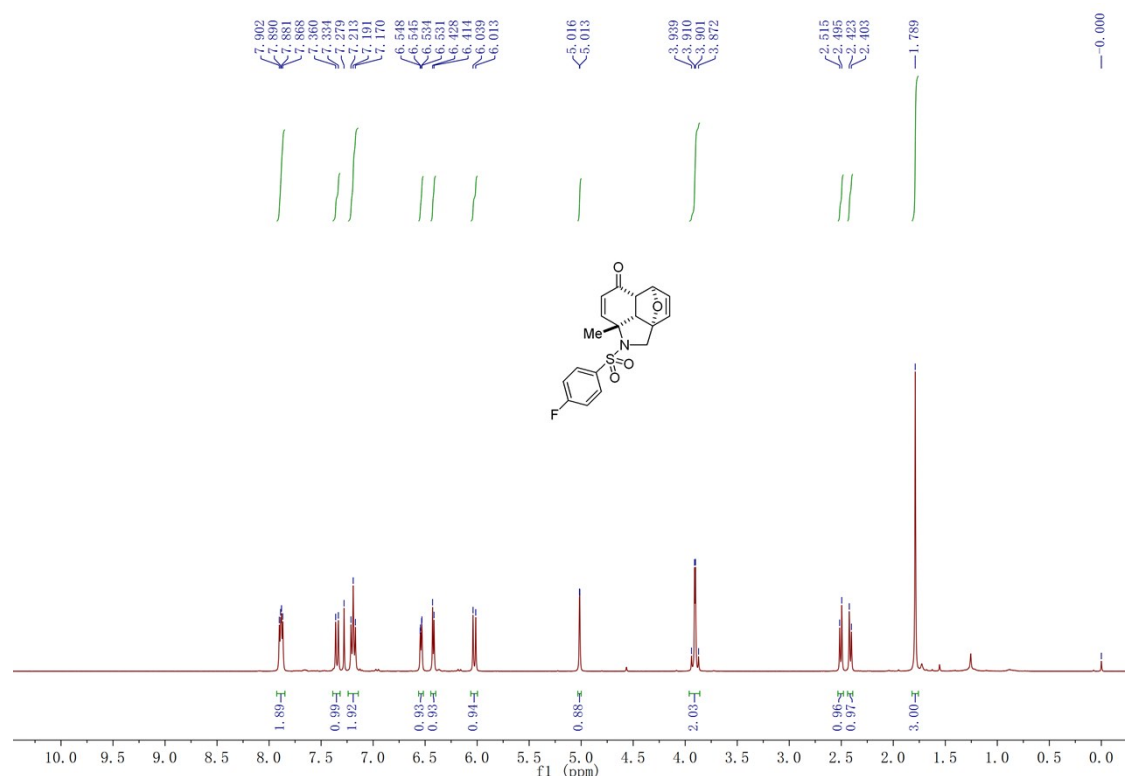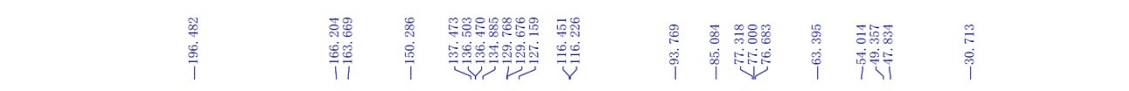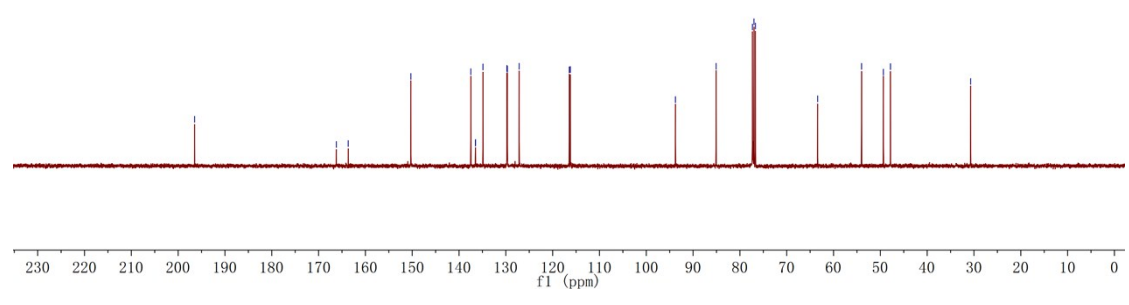





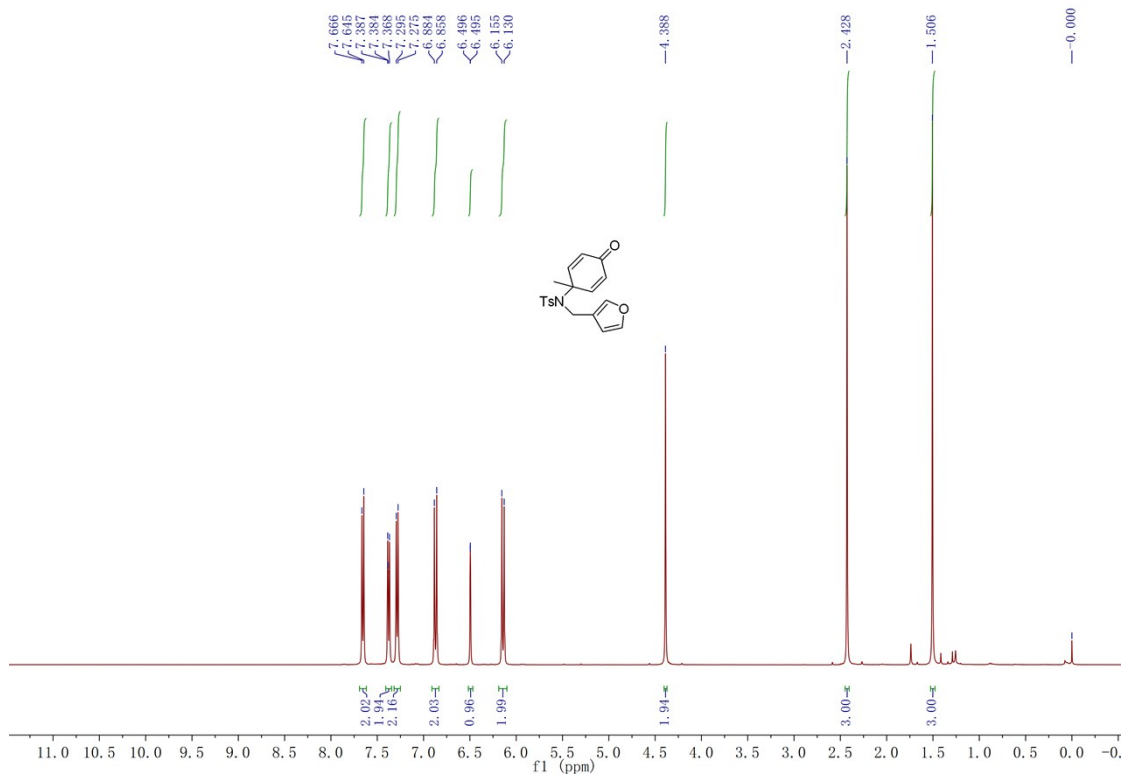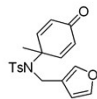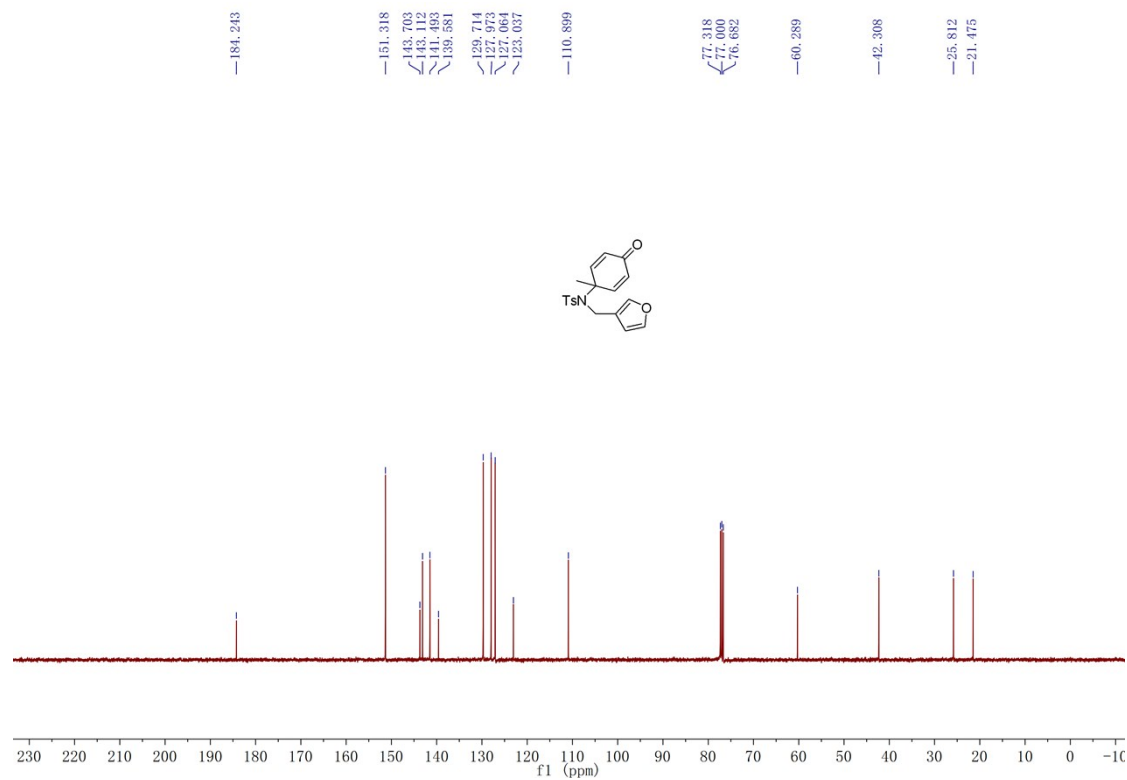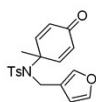

**Compound 1af':**

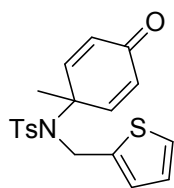

0.3 mmol scale, a light yellow solid, 87% yield (97.5 mg). M.p.: 185-188 °C.  $^1\text{H}$  NMR ( $\text{CDCl}_3$ , TMS, 400 MHz)  $\delta$  1.52 (s, 3H), 2.42 (s, 3H), 4.72 (s, 2H), 6.14 (d,  $J = 9.6$  Hz, 2H), 6.90-6.95 (m, 3H), 7.00 (d,  $J = 2.8$  Hz, 1H), 7.25-7.28 (m, 3H), 7.63 (d,  $J = 8.0$  Hz, 2H).  $^{13}\text{C}$  NMR ( $\text{CDCl}_3$ , TMS, 100 MHz) 21.5, 25.7, 46.0, 60.5, 125.9, 126.7, 127.1, 127.7, 128.1, 129.7, 139.5, 141.4, 143.7, 151.1, 184.3. IR (neat) 3105, 3063, 3047, 2985, 2924, 2846, 1704, 1666, 1628, 1597, 1494, 1453, 1436, 1390, 1343, 1325, 1305, 1266, 1246, 1228, 1182, 1153, 1087, 1063, 1041, 955, 885, 861, 811, 766, 733, 703, 662  $\text{cm}^{-1}$ . HRMS (ESI) Calcd. for  $\text{C}_{19}\text{H}_{23}\text{N}_2\text{O}_3\text{S}_2^{+1}(\text{M}+\text{NH}_4)^+$  requires: 391.1145, Found: 391.1154.

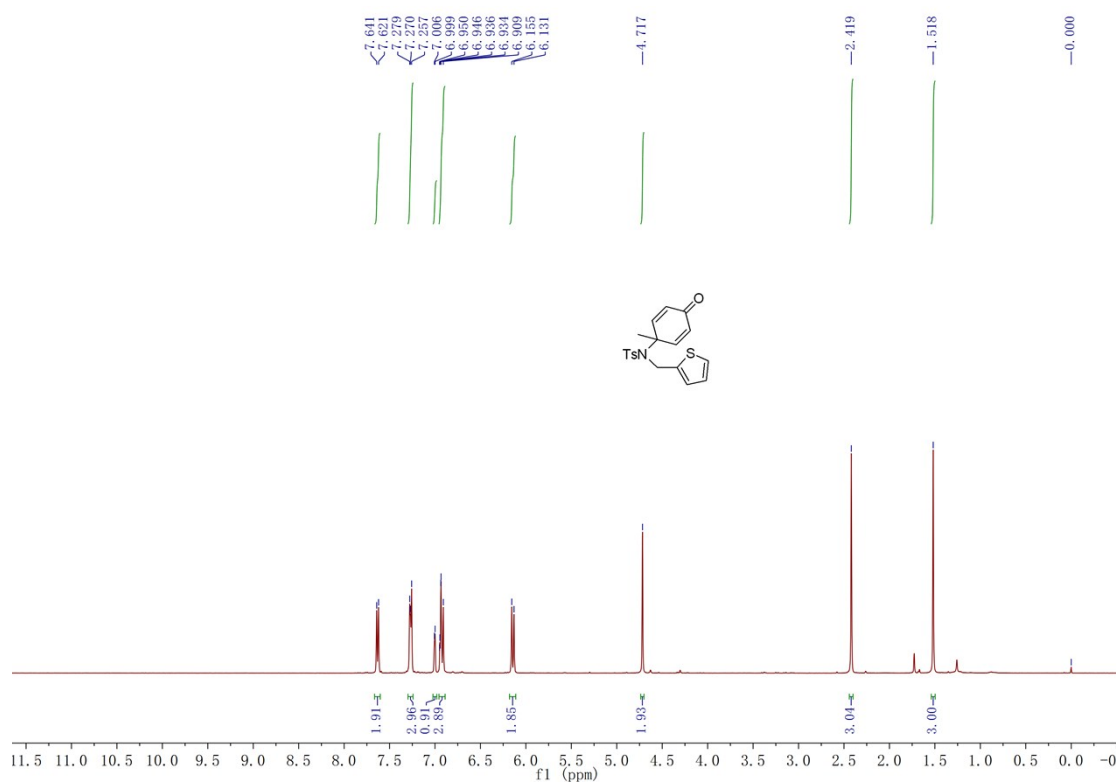

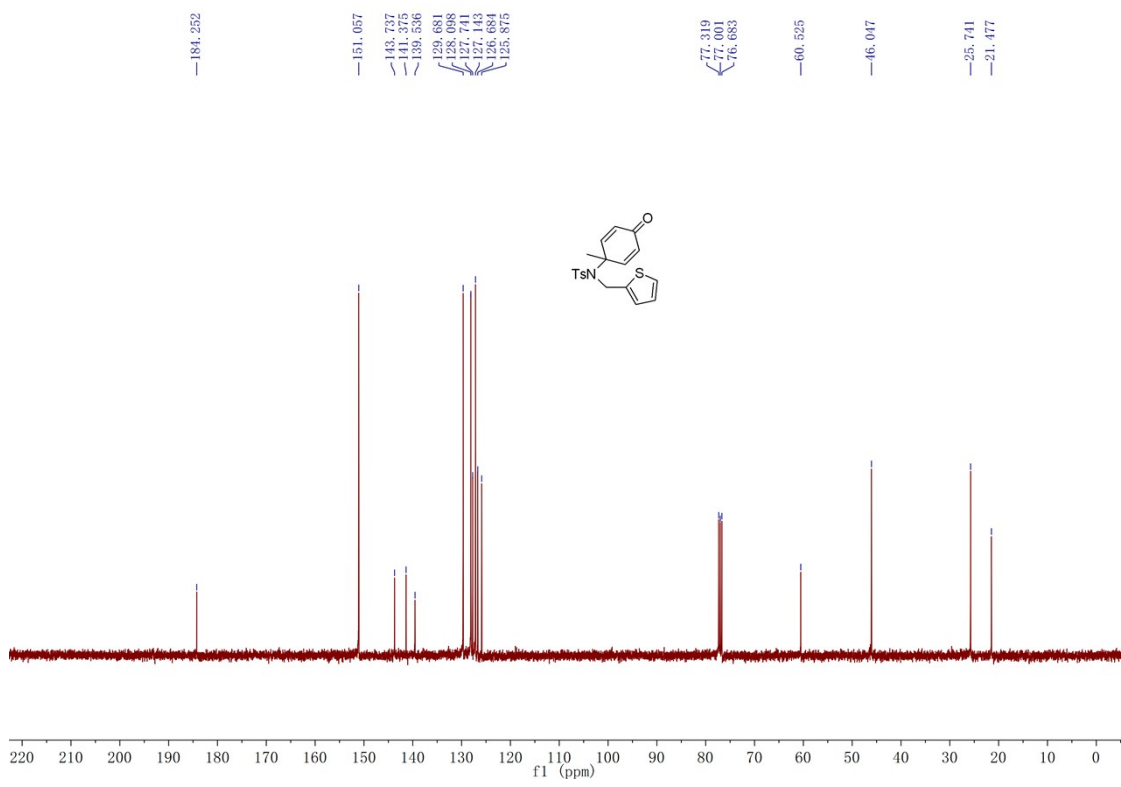

## 6. General procedure for the synthesis of **4**, **5** and their characterization and spectra charts.

To a solution of **1a** (0.3 mmol, 1.0 equiv.) and  $\text{CeCl}_3 \cdot 7\text{H}_2\text{O}$  (0.36 mmol, 1.2 equiv.) in MeOH (30.0 mL),  $\text{NaBH}_4$  (0.33 mmol, 1.1 equiv.) was carefully added in portion at 0 °C. Then, the resulting mixture was allowed to warm to room temperature and was stirred for 5 hours. Next, the reaction was quenched by water (0.2 mL). After the solvent was removed under vacuum and the residue was purified by a silica gel column chromatography (PE/EA = 2/1) to give the desired product **4** as a white solid.

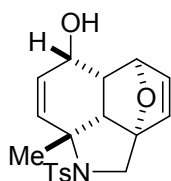

### Compound **4**:

0.30 mmol scale, a white solid, 83% yield (89.5 mg). M.p.: 170-172 °C.  $^1\text{H}$  NMR ( $\text{CDCl}_3$ , TMS, 400 MHz)  $\delta$  1.57 (s, 3H), 2.18-2.24 (m, 2H), 2.41 (s, 3H), 2.74 (d,  $J = 4.4$  Hz, 1H), 3.83 (d,  $J = 11.2$  Hz, 1H), 3.88 (d,  $J = 11.2$  Hz, 1H), 4.59-4.63 (m, 1H), 5.26 (d,  $J = 1.2$  Hz, 1H), 5.55 (dd,  $J = 0.8$  Hz, 10.4 Hz, 1H), 6.22 (dd,  $J = 2.8$  Hz, 10.4 Hz, 1H), 6.32 (d,  $J = 5.6$  Hz, 1H), 6.49 (dd,  $J = 1.6$  Hz, 5.6 Hz, 1H), 7.29 (d,  $J = 8.0$  Hz, 2H), 7.76 (d,  $J = 8.0$  Hz, 2H).  $^{13}\text{C}$  NMR ( $\text{CDCl}_3$ , TMS, 100 MHz)  $\delta$  21.4, 28.4, 43.3, 50.0, 53.7, 64.9, 65.6, 79.9, 92.9, 126.9, 128.0, 129.6, 133.8, 134.6, 138.1, 139.4, 143.0. IR (neat)  $\nu$  3382, 3332, 3078, 3050, 3029, 3005, 2966, 2928, 2887, 2866, 2851, 2819, 1597, 1495, 1461, 1388, 1367, 1317, 1301, 1278, 1262, 1215, 1180, 1149, 1122, 1101, 1073, 1060, 1018, 990, 960, 900, 880, 862, 845, 809, 758, 735, 717, 707, 688, 664  $\text{cm}^{-1}$ . HRMS (ESI) Calcd. for  $\text{C}_{19}\text{H}_{25}\text{N}_2\text{O}_4\text{S}^+(\text{M}+\text{NH}_4)^+$  requires: 377.1530, found: 377.1526.

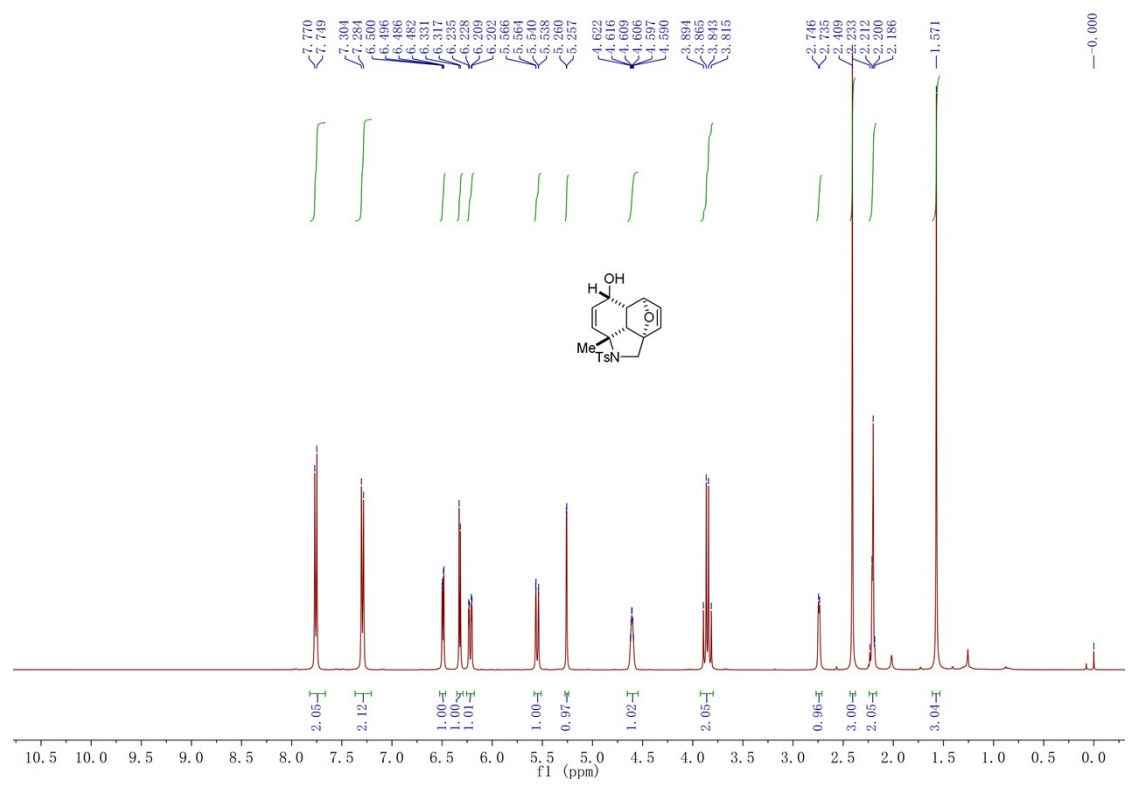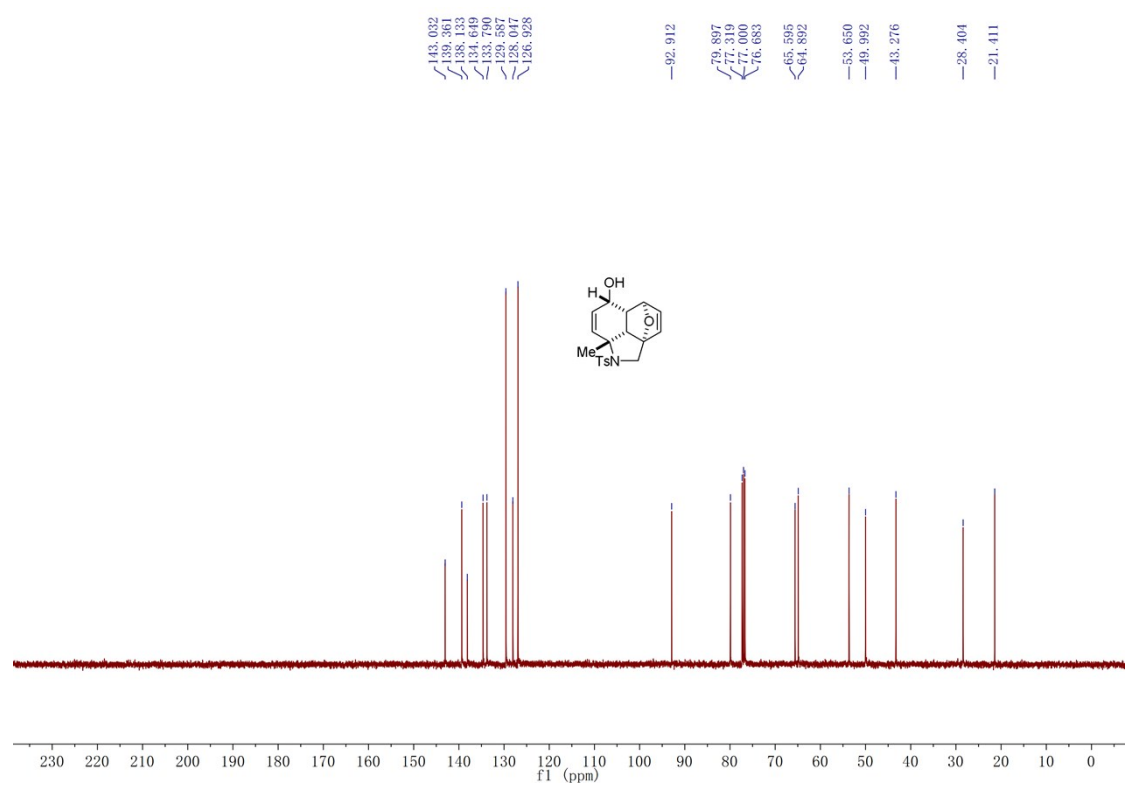

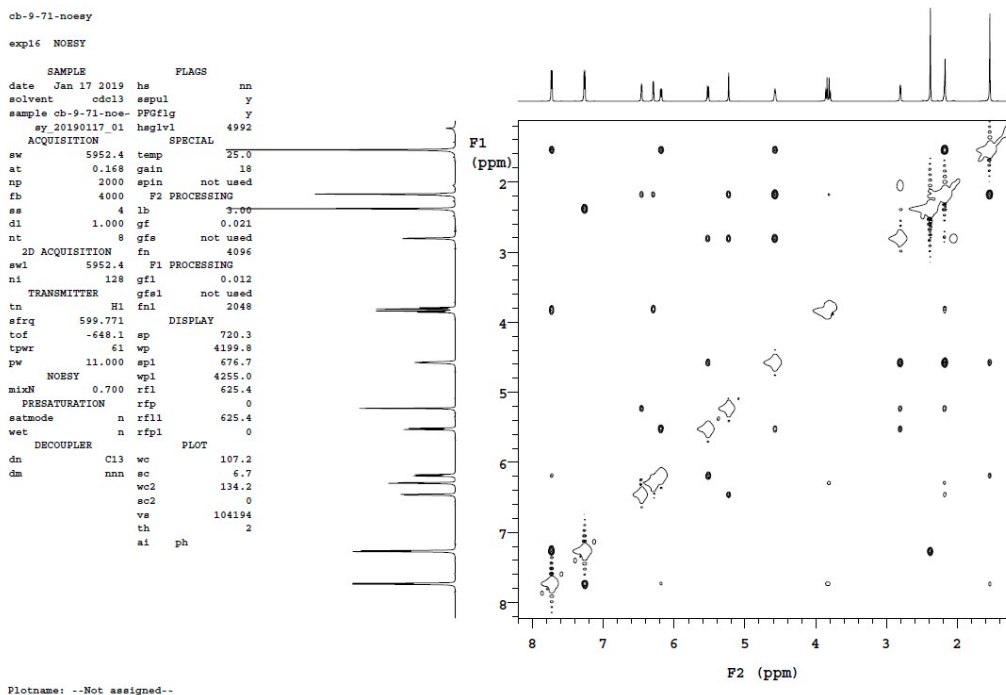

To a Schlenk tube was added **1a** (0.3 mmol) and Pd/C (0.03 mmol) and MeOH (3.0 mL), then, the resulting solution was evacuated and backfilled with H<sub>2</sub> for 3 times and stirred at 25 °C for 24 h under H<sub>2</sub>. The solvent was removed under vacuum and the residue was purified by a silica gel column chromatography (PE/EA = 3/1) to give the desired product **5** as a white solid.

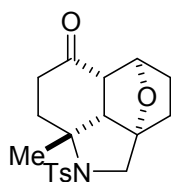

### Compound 5:

0.30 mmol scale, a white solid, 60% yield (64.9 mg). M.p.: 158-159 °C. <sup>1</sup>H NMR (CDCl<sub>3</sub>, TMS, 400 MHz) δ 1.57-1.63 (m, 1H), 1.64-1.77 (m, 5H), 1.87-1.95 (m, 1H), 2.01-2.17 (m, 2H), 2.29-2.37 (m, 1H), 2.41-2.44 (m, 4H), 2.49-2.57 (m, 1H), 2.63 (d, *J* = 8.8 Hz, 1H), 3.66 (d, *J* = 11.6 Hz, 1H), 3.82 (d, *J* = 11.6 Hz, 1H), 4.65 (d, *J* = 5.6 Hz, 1H), 7.30 (d, *J* = 8.0 Hz, 2H), 7.76 (d, *J* = 8.0 Hz, 2H). <sup>13</sup>C NMR (CDCl<sub>3</sub>, TMS, 100 MHz) δ 21.5, 27.8, 29.6, 30.0, 31.7, 36.3, 50.4, 57.6, 60.0, 65.1, 82.5, 91.2, 127.2, 129.6, 137.8, 143.3, 210.6. IR (neat) ν 3060, 3029, 2951, 2874, 1705, 1598, 1494, 1463, 1381, 1333, 1303, 1197, 1152, 1121, 1086, 1042, 1013, 975, 880, 831, 815, 733, 708, 680 cm<sup>-1</sup>. HRMS (ESI) Calcd. for C<sub>19</sub>H<sub>24</sub>NO<sub>4</sub>S<sup>+</sup>(M+H)<sup>+</sup> requires: 362.1421, found: 362.1421.

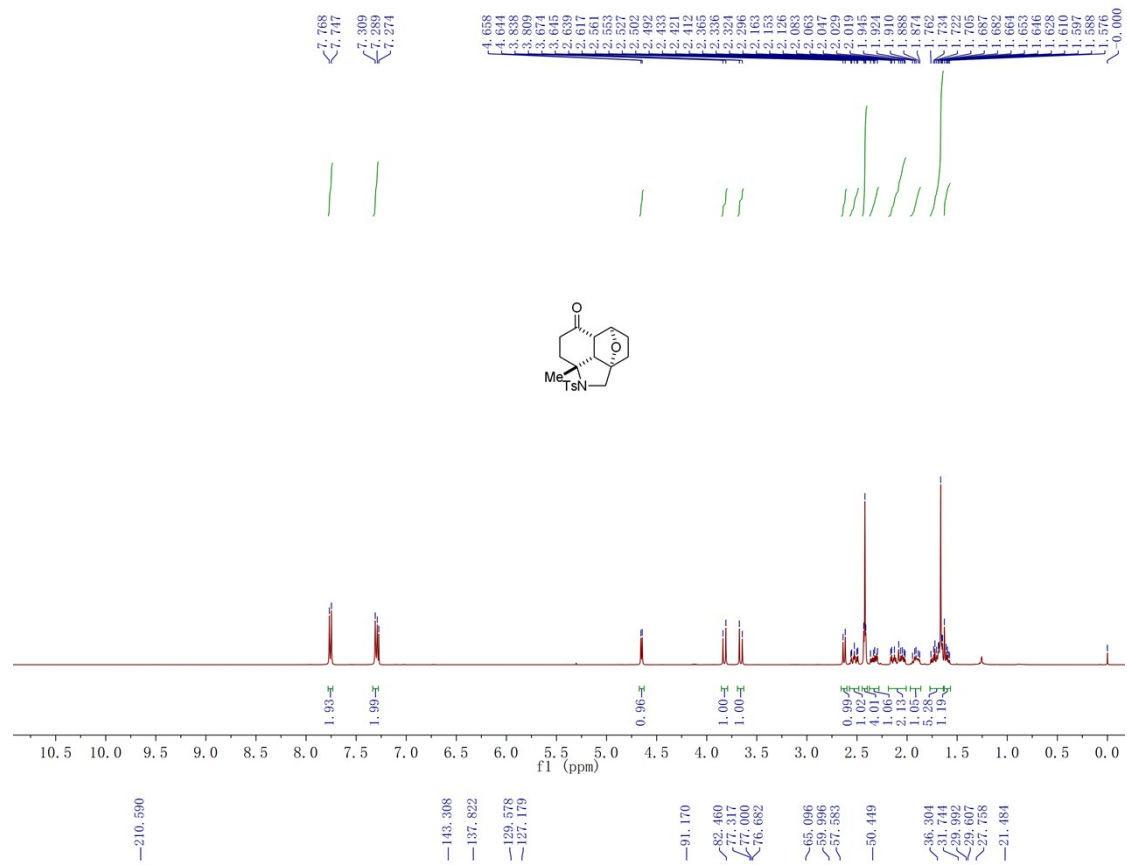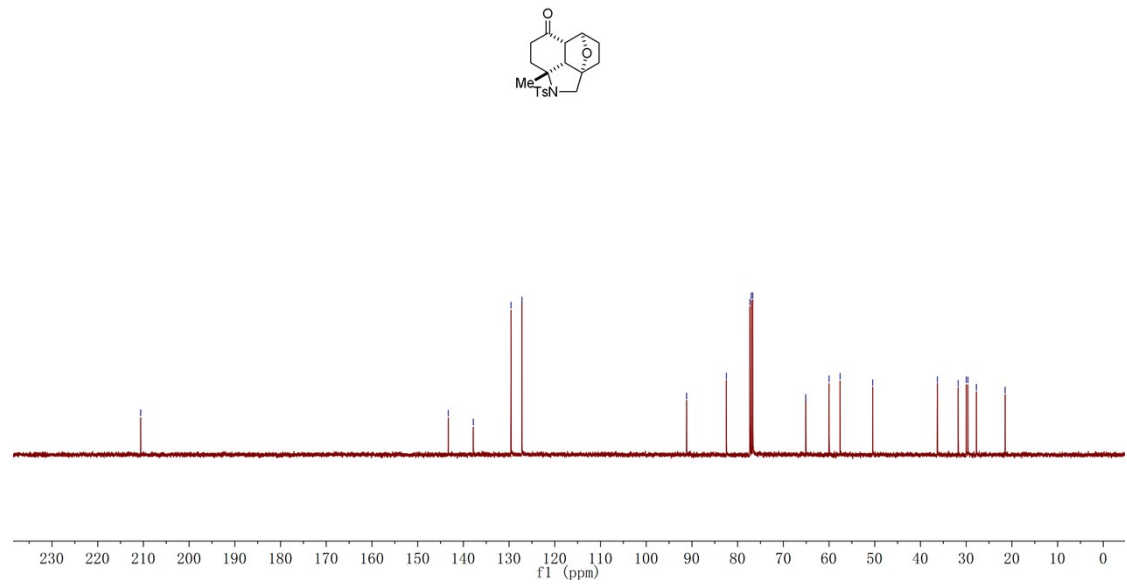

## 7. X-ray crystallographic information of product 3a.

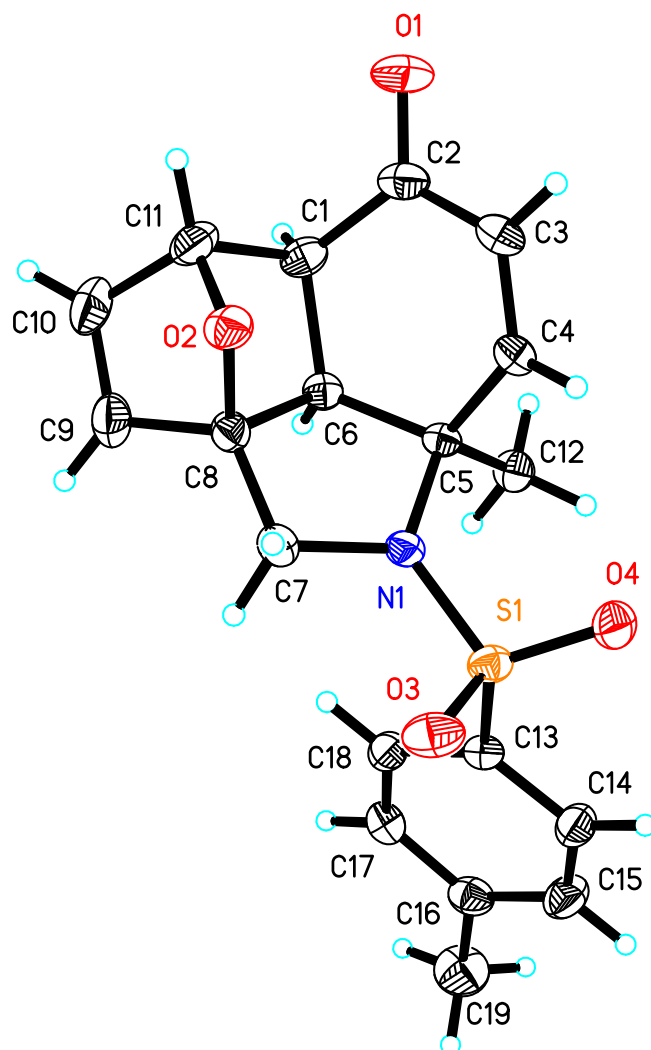

The crystal data of **3a** have been deposited in CCDC with number 1873972. Empirical Formula:  $C_{19}H_{19}NO_4S$ ; Formula Weight: 357.41; Crystal Color, Habit: colorless, Crystal Dimensions: 0.200 x 0.160 x 0.110 mm<sup>3</sup>; Crystal System: Monoclinic; Lattice Parameters:  $a = 16.3542(10)\text{\AA}$ ,  $b = 6.0255(4)\text{\AA}$ ,  $c = 17.1246(12)\text{\AA}$ ,  $\alpha = 90^\circ$ ,  $\beta = 98.854(2)^\circ$ ,  $\gamma = 90^\circ$ ,  $V = 1667.39(19)\text{\AA}^3$ ; Space group: P 21/n;  $Z = 4$ ;  $D_{calc} = 1.424\text{ g/cm}^3$ ;  $F_{000} = 752$ ; Final R indices [ $I > 2\sigma(I)$ ]  $R1 = 0.0433$ ,  $wR2 = 0.1060$ .



## 8. References.

- [1] (a) S. C. Banfield, M. A. Kerr, *Can. J. Chem.* **2004**, *82*, 131; (b) P. Jia, Q. Zhang, Jin, H. Y. Huang, *Org. Lett.* **2017**, *19*, 412; (c) B. Cao, Y. Wei, M. Shi, *Chem. Commun.*, **2018**, *54*, 14085.
